# Supplementary material for: Mortality and Other Important Diabetes-Related Outcomes With Insulin vs Other Antihyperglycemic Therapies in Type 2 Diabetes
Source: PubMed Central journal article supplement — J Clin Endocrinol Metab. 2013 Jan 31;98(2):668–77. doi: 10.1210/jc.2012-3042 (PMC3612791; doi:10.1210/jc.2012-3042), 2013-01-31
Supplement: supp_jc.2012-3042_12-3042_Appendix_1.pdf [file supp_jc.2012-3042_12-3042_Appendix_1.pdf]

## Appendix 1

### Read codes used to identify MACE

| Read code | Description                                                  | MI | Stroke |
|-----------|--------------------------------------------------------------|----|--------|
| G30..00   | Acute myocardial infarction                                  | 1  | 0      |
| G30..11   | Attack - heart                                               | 1  | 0      |
| G30..12   | Coronary thrombosis                                          | 1  | 0      |
| G30..13   | Cardiac rupture following myocardial infarction (MI)         | 1  | 0      |
| G30..14   | Heart attack                                                 | 1  | 0      |
| G30..15   | MI - acute myocardial infarction                             | 1  | 0      |
| G30..16   | Thrombosis - coronary                                        | 1  | 0      |
| G30..17   | Silent myocardial infarction                                 | 1  | 0      |
| G300.00   | Acute anterolateral infarction                               | 1  | 0      |
| G301.00   | Other specified anterior myocardial infarction               | 1  | 0      |
| G301000   | Acute anteroapical infarction                                | 1  | 0      |
| G301100   | Acute anteroseptal infarction                                | 1  | 0      |
| G301z00   | Anterior myocardial infarction NOS                           | 1  | 0      |
| G302.00   | Acute inferolateral infarction                               | 1  | 0      |
| G303.00   | Acute inferoposterior infarction                             | 1  | 0      |
| G304.00   | Posterior myocardial infarction NOS                          | 1  | 0      |
| G305.00   | Lateral myocardial infarction NOS                            | 1  | 0      |
| G306.00   | True posterior myocardial infarction                         | 1  | 0      |
| G307.00   | Acute subendocardial infarction                              | 1  | 0      |
| G307000   | Acute non-Q wave infarction                                  | 1  | 0      |
| G307100   | Acute non-ST segment elevation myocardial infarction         | 1  | 0      |
| G308.00   | Inferior myocardial infarction NOS                           | 1  | 0      |
| G309.00   | Acute Q-wave infarct                                         | 1  | 0      |
| G30A.00   | Mural thrombosis                                             | 1  | 0      |
| G30B.00   | Acute posterolateral myocardial infarction                   | 1  | 0      |
| G30X.00   | Acute transmural myocardial infarction of unspecif site      | 1  | 0      |
| G30X000   | Acute ST segment elevation myocardial infarction             | 1  | 0      |
| G30y.00   | Other acute myocardial infarction                            | 1  | 0      |
| G30y000   | Acute atrial infarction                                      | 1  | 0      |
| G30y100   | Acute papillary muscle infarction                            | 1  | 0      |
| G30y200   | Acute septal infarction                                      | 1  | 0      |
| G30yz00   | Other acute myocardial infarction NOS                        | 1  | 0      |
| G30z.00   | Acute myocardial infarction NOS                              | 1  | 0      |
| G312.00   | Coronary thrombosis not resulting in myocardial infarction   | 1  | 0      |
| G38..00   | Postoperative myocardial infarction                          | 1  | 0      |
| G380.00   | Postoperative transmural myocardial infarction anterior wall | 1  | 0      |
| G381.00   | Postoperative transmural myocardial infarction inferior wall | 1  | 0      |
| G384.00   | Postoperative subendocardial myocardial infarction           | 1  | 0      |
| G38z.00   | Postoperative myocardial infarction, unspecified             | 1  | 0      |
| G501.00   | Post infarction pericarditis                                 | 1  | 0      |
| G6...00   | Cerebrovascular disease                                      | 0  | 1      |
| G60..00   | Subarachnoid haemorrhage                                     | 0  | 1      |
| G600.00   | Ruptured berry aneurysm                                      | 0  | 1      |
| G601.00   | Subarachnoid haemorrhage from carotid siphon and bifurcation | 0  | 1      |
| G602.00   | Subarachnoid haemorrhage from middle cerebral artery         | 0  | 1      |
| G603.00   | Subarachnoid haemorrhage from anterior communicating artery  | 0  | 1      |
| G604.00   | Subarachnoid haemorrhage from posterior communicating artery | 0  | 1      |
| G605.00   | Subarachnoid haemorrhage from basilar artery                 | 0  | 1      |
| G606.00   | Subarachnoid haemorrhage from vertebral artery               | 0  | 1      |
| G60X.00   | Subarachnoid haemorrh from intracranial artery, unspecif     | 0  | 1      |
| G60z.00   | Subarachnoid haemorrhage NOS                                 | 0  | 1      |
| G61..00   | Intracerebral haemorrhage                                    | 0  | 1      |
| G61..11   | CVA - cerebrovascular accid due to intracerebral haemorrhage | 0  | 1      |

| Read code | Description                                                 | MI | Stroke |
|-----------|-------------------------------------------------------------|----|--------|
| G61..12   | Stroke due to intracerebral haemorrhage                     | 0  | 1      |
| G610.00   | Cortical haemorrhage                                        | 0  | 1      |
| G611.00   | Internal capsule haemorrhage                                | 0  | 1      |
| G612.00   | Basal nucleus haemorrhage                                   | 0  | 1      |
| G613.00   | Cerebellar haemorrhage                                      | 0  | 1      |
| G614.00   | Pontine haemorrhage                                         | 0  | 1      |
| G615.00   | Bulbar haemorrhage                                          | 0  | 1      |
| G616.00   | External capsule haemorrhage                                | 0  | 1      |
| G617.00   | Intracerebral haemorrhage, intraventricular                 | 0  | 1      |
| G618.00   | Intracerebral haemorrhage, multiple localized               | 0  | 1      |
| G61X.00   | Intracerebral haemorrhage in hemisphere, unspecified        | 0  | 1      |
| G61X000   | Left sided intracerebral haemorrhage, unspecified           | 0  | 1      |
| G61X100   | Right sided intracerebral haemorrhage, unspecified          | 0  | 1      |
| G61z.00   | Intracerebral haemorrhage NOS                               | 0  | 1      |
| G62..00   | Other and unspecified intracranial haemorrhage              | 0  | 1      |
| G620.00   | Extradural haemorrhage - nontraumatic                       | 0  | 1      |
| G621.00   | Subdural haemorrhage - nontraumatic                         | 0  | 1      |
| G622.00   | Subdural haematoma - nontraumatic                           | 0  | 1      |
| G623.00   | Subdural haemorrhage NOS                                    | 0  | 1      |
| G62z.00   | Intracranial haemorrhage NOS                                | 0  | 1      |
| G63..00   | Precerebral arterial occlusion                              | 0  | 1      |
| G63..11   | Infarction - precerebral                                    | 0  | 1      |
| G63..12   | Stenosis of precerebral arteries                            | 0  | 1      |
| G630.00   | Basilar artery occlusion                                    | 0  | 1      |
| G631.00   | Carotid artery occlusion                                    | 0  | 1      |
| G631.11   | Stenosis, carotid artery                                    | 0  | 1      |
| G631.12   | Thrombosis, carotid artery                                  | 0  | 1      |
| G632.00   | Vertebral artery occlusion                                  | 0  | 1      |
| G633.00   | Multiple and bilateral precerebral arterial occlusion       | 0  | 1      |
| G634.00   | Carotid artery stenosis                                     | 0  | 1      |
| G63y.00   | Other precerebral artery occlusion                          | 0  | 1      |
| G63y000   | Cerebral infarct due to thrombosis of precerebral arteries  | 0  | 1      |
| G63y100   | Cerebral infarction due to embolism of precerebral arteries | 0  | 1      |
| G63z.00   | Precerebral artery occlusion NOS                            | 0  | 1      |
| G64..00   | Cerebral arterial occlusion                                 | 0  | 1      |
| G64..11   | CVA - cerebral artery occlusion                             | 0  | 1      |
| G64..12   | Infarction - cerebral                                       | 0  | 1      |
| G64..13   | Stroke due to cerebral arterial occlusion                   | 0  | 1      |
| G640.00   | Cerebral thrombosis                                         | 0  | 1      |
| G640000   | Cerebral infarction due to thrombosis of cerebral arteries  | 0  | 1      |
| G641.00   | Cerebral embolism                                           | 0  | 1      |
| G641.11   | Cerebral embolus                                            | 0  | 1      |
| G641000   | Cerebral infarction due to embolism of cerebral arteries    | 0  | 1      |
| G64z.00   | Cerebral infarction NOS                                     | 0  | 1      |
| G64z.11   | Brainstem infarction NOS                                    | 0  | 1      |
| G64z.12   | Cerebellar infarction                                       | 0  | 1      |
| G64z000   | Brainstem infarction                                        | 0  | 1      |
| G64z100   | Wallenberg syndrome                                         | 0  | 1      |
| G64z111   | Lateral medullary syndrome                                  | 0  | 1      |
| G64z200   | Left sided cerebral infarction                              | 0  | 1      |
| G64z300   | Right sided cerebral infarction                             | 0  | 1      |
| G64z400   | Infarction of basal ganglia                                 | 0  | 1      |
| G66..00   | Stroke and cerebrovascular accident unspecified             | 0  | 1      |
| G66..11   | CVA unspecified                                             | 0  | 1      |
| G66..12   | Stroke unspecified                                          | 0  | 1      |
| G66..13   | CVA - Cerebrovascular accident unspecified                  | 0  | 1      |
| G660.00   | Middle cerebral artery syndrome                             | 0  | 1      |
| G661.00   | Anterior cerebral artery syndrome                           | 0  | 1      |
| G662.00   | Posterior cerebral artery syndrome                          | 0  | 1      |
| G663.00   | Brain stem stroke syndrome                                  | 0  | 1      |
| G664.00   | Cerebellar stroke syndrome                                  | 0  | 1      |

| Read code | Description                                                 | MI | Stroke |
|-----------|-------------------------------------------------------------|----|--------|
| G665.00   | Pure motor lacunar syndrome                                 | 0  | 1      |
| G666.00   | Pure sensory lacunar syndrome                               | 0  | 1      |
| G667.00   | Left sided CVA                                              | 0  | 1      |
| G668.00   | Right sided CVA                                             | 0  | 1      |
| G669.00   | Cerebral palsy, not congenital or infantile, acute          | 0  | 1      |
| G6W..00   | Cereb infarct due unsp occlus/stenos precerebr arteries     | 0  | 1      |
| G6X..00   | Cerebrl infarctn due/unspcf occlusn or sten/cerebrl artr    | 0  | 1      |
| Gyu3400   | [X]Acute transmural myocardial infarction of unspecif site  | 1  | 0      |
| Gyu6100   | [X]Other subarachnoid haemorrhage                           | 0  | 1      |
| Gyu6200   | [X]Other intracerebral haemorrhage                          | 0  | 1      |
| Gyu6300   | [X]Cerebrl infarctn due/unspcf occlusn or sten/cerebrl artr | 0  | 1      |
| Gyu6400   | [X]Other cerebral infarction                                | 0  | 1      |
| Gyu6500   | [X]Occlusion and stenosis of other precerebral arteries     | 0  | 1      |
| Gyu6600   | [X]Occlusion and stenosis of other cerebral arteries        | 0  | 1      |
| Gyu6F00   | [X]Intracerebral haemorrhage in hemisphere, unspecified     | 0  | 1      |
| Gyu6G00   | [X]Cereb infarct due unsp occlus/stenos precerebr arteries  | 0  | 1      |

## Cancers

| Read code | Description                                           |
|-----------|-------------------------------------------------------|
| B...00    | Neoplasms                                             |
| B...11    | Cancers                                               |
| B0...00   | Malignant neoplasm of lip, oral cavity and pharynx    |
| B0...11   | Carcinoma of lip, oral cavity and pharynx             |
| B00..00   | Malignant neoplasm of lip                             |
| B00..11   | Carcinoma of lip                                      |
| B000.00   | Malignant neoplasm of upper lip, vermilion border     |
| B000000   | Malignant neoplasm of upper lip, external             |
| B000100   | Malignant neoplasm of upper lip, lipstick area        |
| B000z00   | Malignant neoplasm of upper lip, vermilion border NOS |
| B001.00   | Malignant neoplasm of lower lip, vermilion border     |
| B001000   | Malignant neoplasm of lower lip, external             |
| B001100   | Malignant neoplasm of lower lip, lipstick area        |
| B002.00   | Malignant neoplasm of upper lip, inner aspect         |
| B002100   | Malignant neoplasm of upper lip, frenulum             |
| B002200   | Malignant neoplasm of upper lip, mucosa               |
| B002300   | Malignant neoplasm of upper lip, oral aspect          |
| B002z00   | Malignant neoplasm of upper lip, inner aspect NOS     |
| B003.00   | Malignant neoplasm of lower lip, inner aspect         |
| B003000   | Malignant neoplasm of lower lip, buccal aspect        |
| B003100   | Malignant neoplasm of lower lip, frenulum             |
| B003200   | Malignant neoplasm of lower lip, mucosa               |
| B003300   | Malignant neoplasm of lower lip, oral aspect          |
| B003z00   | Malignant neoplasm of lower lip, inner aspect NOS     |
| B004.00   | Malignant neoplasm of lip unspecified, inner aspect   |
| B004000   | Malignant neoplasm of lip unspecified, buccal aspect  |
| B004200   | Malignant neoplasm of lip unspecified, mucosa         |
| B004300   | Malignant neoplasm of lip, oral aspect                |
| B005.00   | Malignant neoplasm of commissure of lip               |
| B006.00   | Malignant neoplasm of overlapping lesion of lip       |
| B007.00   | Malignant neoplasm of lip, unspecified                |
| B00z000   | Malignant neoplasm of lip, unspecified, external      |
| B00z100   | Malignant neoplasm of lip, unspecified, lipstick area |
| B00zz00   | Malignant neoplasm of lip, vermilion border NOS       |
| B01..00   | Malignant neoplasm of tongue                          |
| B010.00   | Malignant neoplasm of base of tongue                  |
| B010.11   | Malignant neoplasm of posterior third of tongue       |
| B010000   | Malignant neoplasm of base of tongue dorsal surface   |
| B010z00   | Malignant neoplasm of fixed part of tongue NOS        |
| B011.00   | Malignant neoplasm of dorsal surface of tongue        |

|         |                                                            |
|---------|------------------------------------------------------------|
| B011z00 | Malignant neoplasm of dorsum of tongue NOS                 |
| B012.00 | Malignant neoplasm of tongue, tip and lateral border       |
| B013.00 | Malignant neoplasm of ventral surface of tongue            |
| B013100 | Malignant neoplasm of frenulum linguae                     |
| B013z00 | Malignant neoplasm of ventral tongue surface NOS           |
| B014.00 | Malignant neoplasm of anterior 2/3 of tongue unspecified   |
| B015.00 | Malignant neoplasm of tongue, junctional zone              |
| B016.00 | Malignant neoplasm of lingual tonsil                       |
| B017.00 | Malignant overlapping lesion of tongue                     |
| B01y.00 | Malignant neoplasm of other sites of tongue                |
| B01z.00 | Malignant neoplasm of tongue NOS                           |
| B02..00 | Malignant neoplasm of major salivary glands                |
| B020.00 | Malignant neoplasm of parotid gland                        |
| B021.00 | Malignant neoplasm of submandibular gland                  |
| B022.00 | Malignant neoplasm of sublingual gland                     |
| B02y.00 | Malignant neoplasm of other major salivary glands          |
| B02z.00 | Malignant neoplasm of major salivary gland NOS             |
| B03..00 | Malignant neoplasm of gum                                  |
| B030.00 | Malignant neoplasm of upper gum                            |
| B031.00 | Malignant neoplasm of lower gum                            |
| B03z.00 | Malignant neoplasm of gum NOS                              |
| B04..00 | Malignant neoplasm of floor of mouth                       |
| B040.00 | Malignant neoplasm of anterior portion of floor of mouth   |
| B041.00 | Malignant neoplasm of lateral portion of floor of mouth    |
| B042.00 | Malignant neoplasm, overlapping lesion of floor of mouth   |
| B04y.00 | Malignant neoplasm of other sites of floor of mouth        |
| B04z.00 | Malignant neoplasm of floor of mouth NOS                   |
| B05..00 | Malignant neoplasm of other and unspecified parts of mouth |
| B050.00 | Malignant neoplasm of cheek mucosa                         |
| B050.11 | Malignant neoplasm of buccal mucosa                        |
| B051000 | Malignant neoplasm of upper buccal sulcus                  |
| B051100 | Malignant neoplasm of lower buccal sulcus                  |
| B052.00 | Malignant neoplasm of hard palate                          |
| B053.00 | Malignant neoplasm of soft palate                          |
| B054.00 | Malignant neoplasm of uvula                                |
| B055.00 | Malignant neoplasm of palate unspecified                   |
| B055000 | Malignant neoplasm of junction of hard and soft palate     |
| B055100 | Malignant neoplasm of roof of mouth                        |
| B055z00 | Malignant neoplasm of palate NOS                           |
| B056.00 | Malignant neoplasm of retromolar area                      |
| B057.00 | Overlapping lesion of other and unspecified parts of mouth |
| B05y.00 | Malignant neoplasm of other specified mouth parts          |
| B05z.00 | Malignant neoplasm of mouth NOS                            |
| B05z000 | Kaposi's sarcoma of palate                                 |
| B06..00 | Malignant neoplasm of oropharynx                           |
| B060.00 | Malignant neoplasm of tonsil                               |
| B060000 | Malignant neoplasm of faucial tonsil                       |
| B060z00 | Malignant neoplasm tonsil NOS                              |
| B061.00 | Malignant neoplasm of tonsillar fossa                      |
| B062.00 | Malignant neoplasm of tonsillar pillar                     |
| B062000 | Malignant neoplasm of faucial pillar                       |
| B062100 | Malignant neoplasm of glossopalatine fold                  |
| B062200 | Malignant neoplasm of palatoglossal arch                   |
| B062300 | Malignant neoplasm of palatopharyngeal arch                |
| B062z00 | Malignant neoplasm of tonsillar fossa NOS                  |
| B063.00 | Malignant neoplasm of vallecula                            |
| B064.00 | Malignant neoplasm of anterior epiglottis                  |
| B064000 | Malignant neoplasm of epiglottis, free border              |
| B064100 | Malignant neoplasm of glossoepiglottic fold                |
| B064z00 | Malignant neoplasm of anterior epiglottis NOS              |
| B065.00 | Malignant neoplasm of junctional region of epiglottis      |
| B066.00 | Malignant neoplasm of lateral wall of oropharynx           |

|         |                                                              |
|---------|--------------------------------------------------------------|
| B067.00 | Malignant neoplasm of posterior wall of oropharynx           |
| B06y.00 | Malignant neoplasm of oropharynx, other specified sites      |
| B06yz00 | Malignant neoplasm of other specified site of oropharynx NOS |
| B06z.00 | Malignant neoplasm of oropharynx NOS                         |
| B07..00 | Malignant neoplasm of nasopharynx                            |
| B070.00 | Malignant neoplasm of roof of nasopharynx                    |
| B071.00 | Malignant neoplasm of posterior wall of nasopharynx          |
| B071000 | Malignant neoplasm of adenoid                                |
| B071100 | Malignant neoplasm of pharyngeal tonsil                      |
| B071z00 | Malignant neoplasm of posterior wall of nasopharynx NOS      |
| B072.00 | Malignant neoplasm of lateral wall of nasopharynx            |
| B072000 | Malignant neoplasm of pharyngeal recess                      |
| B073.00 | Malignant neoplasm of anterior wall of nasopharynx           |
| B073200 | Malignant neoplasm posterior margin nasal septum and choanae |
| B073z00 | Malignant neoplasm of anterior wall of nasopharynx NOS       |
| B074.00 | Malignant neoplasm, overlapping lesion of nasopharynx        |
| B07y.00 | Malignant neoplasm of other specified site of nasopharynx    |
| B07z.00 | Malignant neoplasm of nasopharynx NOS                        |
| B08..00 | Malignant neoplasm of hypopharynx                            |
| B080.00 | Malignant neoplasm of postcricoid region                     |
| B081.00 | Malignant neoplasm of pyriform sinus                         |
| B082.00 | Malignant neoplasm aryepiglottic fold, hypopharyngeal aspect |
| B083.00 | Malignant neoplasm of posterior pharynx                      |
| B08y.00 | Malignant neoplasm of other specified hypopharyngeal site    |
| B08z.00 | Malignant neoplasm of hypopharynx NOS                        |
| B0z..00 | Malig neop other/ill-defined sites lip, oral cavity, pharynx |
| B0z0.00 | Malignant neoplasm of pharynx unspecified                    |
| B0z1.00 | Malignant neoplasm of Waldeyer's ring                        |
| B0z2.00 | Malignant neoplasm of laryngopharynx                         |
| B0zy.00 | Malignant neoplasm of other sites lip, oral cavity, pharynx  |
| B0zz.00 | Malignant neoplasm of lip, oral cavity and pharynx NOS       |
| B1...00 | Malignant neoplasm of digestive organs and peritoneum        |
| B1...11 | Carcinoma of digestive organs and peritoneum                 |
| B10..00 | Malignant neoplasm of oesophagus                             |
| B100.00 | Malignant neoplasm of cervical oesophagus                    |
| B101.00 | Malignant neoplasm of thoracic oesophagus                    |
| B102.00 | Malignant neoplasm of abdominal oesophagus                   |
| B103.00 | Malignant neoplasm of upper third of oesophagus              |
| B104.00 | Malignant neoplasm of middle third of oesophagus             |
| B105.00 | Malignant neoplasm of lower third of oesophagus              |
| B106.00 | Malignant neoplasm, overlapping lesion of oesophagus         |
| B107.00 | Siewert type I adenocarcinoma                                |
| B10y.00 | Malignant neoplasm of other specified part of oesophagus     |
| B10z.00 | Malignant neoplasm of oesophagus NOS                         |
| B10z.11 | Oesophageal cancer                                           |
| B11..00 | Malignant neoplasm of stomach                                |
| B11..11 | Gastric neoplasm                                             |
| B110.00 | Malignant neoplasm of cardia of stomach                      |
| B110000 | Malignant neoplasm of cardiac orifice of stomach             |
| B110100 | Malignant neoplasm of cardio-oesophageal junction of stomach |
| B110111 | Malignant neoplasm of gastro-oesophageal junction            |
| B110z00 | Malignant neoplasm of cardia of stomach NOS                  |
| B111.00 | Malignant neoplasm of pylorus of stomach                     |
| B111000 | Malignant neoplasm of prepylorus of stomach                  |
| B111100 | Malignant neoplasm of pyloric canal of stomach               |
| B111z00 | Malignant neoplasm of pylorus of stomach NOS                 |
| B112.00 | Malignant neoplasm of pyloric antrum of stomach              |
| B113.00 | Malignant neoplasm of fundus of stomach                      |
| B114.00 | Malignant neoplasm of body of stomach                        |
| B115.00 | Malignant neoplasm of lesser curve of stomach unspecified    |
| B116.00 | Malignant neoplasm of greater curve of stomach unspecified   |
| B117.00 | Malignant neoplasm, overlapping lesion of stomach            |

|         |                                                              |
|---------|--------------------------------------------------------------|
| B118.00 | Siewert type II adenocarcinoma                               |
| B119.00 | Siewert type III adenocarcinoma                              |
| B11y.00 | Malignant neoplasm of other specified site of stomach        |
| B11y000 | Malignant neoplasm of anterior wall of stomach NEC           |
| B11y100 | Malignant neoplasm of posterior wall of stomach NEC          |
| B11yz00 | Malignant neoplasm of other specified site of stomach NOS    |
| B11z.00 | Malignant neoplasm of stomach NOS                            |
| B12..00 | Malignant neoplasm of small intestine and duodenum           |
| B120.00 | Malignant neoplasm of duodenum                               |
| B121.00 | Malignant neoplasm of jejunum                                |
| B122.00 | Malignant neoplasm of ileum                                  |
| B123.00 | Malignant neoplasm of Meckel's diverticulum                  |
| B124.00 | Malignant neoplasm, overlapping lesion of small intestine    |
| B12y.00 | Malignant neoplasm of other specified site small intestine   |
| B12z.00 | Malignant neoplasm of small intestine NOS                    |
| B13..00 | Malignant neoplasm of colon                                  |
| B130.00 | Malignant neoplasm of hepatic flexure of colon               |
| B131.00 | Malignant neoplasm of transverse colon                       |
| B132.00 | Malignant neoplasm of descending colon                       |
| B133.00 | Malignant neoplasm of sigmoid colon                          |
| B134.00 | Malignant neoplasm of caecum                                 |
| B134.11 | Carcinoma of caecum                                          |
| B135.00 | Malignant neoplasm of appendix                               |
| B136.00 | Malignant neoplasm of ascending colon                        |
| B137.00 | Malignant neoplasm of splenic flexure of colon               |
| B138.00 | Malignant neoplasm, overlapping lesion of colon              |
| B13y.00 | Malignant neoplasm of other specified sites of colon         |
| B13z.00 | Malignant neoplasm of colon NOS                              |
| B13z.11 | Colonic cancer                                               |
| B14..00 | Malignant neoplasm of rectum, rectosigmoid junction and anus |
| B140.00 | Malignant neoplasm of rectosigmoid junction                  |
| B141.00 | Malignant neoplasm of rectum                                 |
| B141.11 | Carcinoma of rectum                                          |
| B141.12 | Rectal carcinoma                                             |
| B142.00 | Malignant neoplasm of anal canal                             |
| B142.11 | Anal carcinoma                                               |
| B142000 | Malignant neoplasm of cloacogenic zone                       |
| B143.00 | Malignant neoplasm of anus unspecified                       |
| B14y.00 | Malig neop other site rectum, rectosigmoid junction and anus |
| B14z.00 | Malignant neoplasm rectum,rectosigmoid junction and anus NOS |
| B15..00 | Malignant neoplasm of liver and intrahepatic bile ducts      |
| B150.00 | Primary malignant neoplasm of liver                          |
| B150000 | Primary carcinoma of liver                                   |
| B150100 | Hepatoblastoma of liver                                      |
| B150200 | Primary angiosarcoma of liver                                |
| B150300 | Hepatocellular carcinoma                                     |
| B150z00 | Primary malignant neoplasm of liver NOS                      |
| B151.00 | Malignant neoplasm of intrahepatic bile ducts                |
| B151000 | Malignant neoplasm of interlobular bile ducts                |
| B151200 | Malignant neoplasm of intrahepatic biliary passages          |
| B151400 | Malignant neoplasm of intrahepatic gall duct                 |
| B151z00 | Malignant neoplasm of intrahepatic bile ducts NOS            |
| B152.00 | Malignant neoplasm of liver unspecified                      |
| B153.00 | Secondary malignant neoplasm of liver                        |
| B15z.00 | Malignant neoplasm of liver and intrahepatic bile ducts NOS  |
| B16..00 | Malignant neoplasm gallbladder and extrahepatic bile ducts   |
| B160.00 | Malignant neoplasm of gallbladder                            |
| B160.11 | Carcinoma gallbladder                                        |
| B161.00 | Malignant neoplasm of extrahepatic bile ducts                |
| B161000 | Malignant neoplasm of cystic duct                            |
| B161100 | Malignant neoplasm of hepatic duct                           |
| B161200 | Malignant neoplasm of common bile duct                       |

|         |                                                              |
|---------|--------------------------------------------------------------|
| B161211 | Carcinoma common bile duct                                   |
| B161z00 | Malignant neoplasm of extrahepatic bile ducts NOS            |
| B162.00 | Malignant neoplasm of ampulla of Vater                       |
| B163.00 | Malignant neoplasm, overlapping lesion of biliary tract      |
| B16y.00 | Malignant neoplasm other gallbladder/extrahepatic bile duct  |
| B16z.00 | Malignant neoplasm gallbladder/extrahepatic bile ducts NOS   |
| B17..00 | Malignant neoplasm of pancreas                               |
| B170.00 | Malignant neoplasm of head of pancreas                       |
| B171.00 | Malignant neoplasm of body of pancreas                       |
| B172.00 | Malignant neoplasm of tail of pancreas                       |
| B173.00 | Malignant neoplasm of pancreatic duct                        |
| B174.00 | Malignant neoplasm of Islets of Langerhans                   |
| B175.00 | Malignant neoplasm, overlapping lesion of pancreas           |
| B17y.00 | Malignant neoplasm of other specified sites of pancreas      |
| B17y000 | Malignant neoplasm of ectopic pancreatic tissue              |
| B17yz00 | Malignant neoplasm of specified site of pancreas NOS         |
| B17z.00 | Malignant neoplasm of pancreas NOS                           |
| B18..00 | Malignant neoplasm of retroperitoneum and peritoneum         |
| B180.00 | Malignant neoplasm of retroperitoneum                        |
| B180100 | Malignant neoplasm of perinephric tissue                     |
| B180200 | Malignant neoplasm of retrocaecal tissue                     |
| B180z00 | Malignant neoplasm of retroperitoneum NOS                    |
| B181.00 | Mesothelioma of peritoneum                                   |
| B18y.00 | Malignant neoplasm of specified parts of peritoneum          |
| B18y100 | Malignant neoplasm of mesocaecum                             |
| B18y200 | Malignant neoplasm of mesorectum                             |
| B18y300 | Malignant neoplasm of omentum                                |
| B18y400 | Malignant neoplasm of parietal peritoneum                    |
| B18y500 | Malignant neoplasm of pelvic peritoneum                      |
| B18y600 | Malignant neoplasm of the pouch of Douglas                   |
| B18y700 | Malignant neoplasm of mesentery                              |
| B18yz00 | Malignant neoplasm of specified parts of peritoneum NOS      |
| B18z.00 | Malignant neoplasm of retroperitoneum and peritoneum NOS     |
| B1z..00 | Malig neop oth/ill-defined sites digestive tract/peritoneum  |
| B1z0.00 | Malignant neoplasm of intestinal tract, part unspecified     |
| B1z0.11 | Cancer of bowel                                              |
| B1z1.00 | Malignant neoplasm of spleen NEC                             |
| B1z1100 | Fibrosarcoma of spleen                                       |
| B1z1z00 | Malignant neoplasm of spleen NOS                             |
| B1z2.00 | Malignant neoplasm, overlapping lesion of digestive system   |
| B1zy.00 | Malignant neoplasm other spec digestive tract and peritoneum |
| B1zz.00 | Malignant neoplasm of digestive tract and peritoneum NOS     |
| B2...00 | Malig neop of respiratory tract and intrathoracic organs     |
| B2...11 | Carcinoma of respiratory tract and intrathoracic organs      |
| B20..00 | Malig neop nasal cavities, middle ear and accessory sinuses  |
| B200.00 | Malignant neoplasm of nasal cavities                         |
| B200000 | Malignant neoplasm of cartilage of nose                      |
| B200100 | Malignant neoplasm of nasal conchae                          |
| B200200 | Malignant neoplasm of septum of nose                         |
| B200300 | Malignant neoplasm of vestibule of nose                      |
| B200z00 | Malignant neoplasm of nasal cavities NOS                     |
| B201.00 | Malig neop auditory tube, middle ear and mastoid air cells   |
| B201100 | Malignant neoplasm of tympanic cavity                        |
| B201200 | Malignant neoplasm of tympanic antrum                        |
| B201300 | Malignant neoplasm of mastoid air cells                      |
| B201z00 | Malig neop auditory tube, middle ear, mastoid air cells NOS  |
| B202.00 | Malignant neoplasm of maxillary sinus                        |
| B203.00 | Malignant neoplasm of ethmoid sinus                          |
| B204.00 | Malignant neoplasm of frontal sinus                          |
| B205.00 | Malignant neoplasm of sphenoidal sinus                       |
| B206.00 | Malignant neoplasm, overlapping lesion of accessory sinuses  |
| B20y.00 | Malig neop other site nasal cavity, middle ear and sinuses   |

|         |                                                               |
|---------|---------------------------------------------------------------|
| B20z.00 | Malignant neoplasm of accessory sinus NOS                     |
| B21.00  | Malignant neoplasm of larynx                                  |
| B210.00 | Malignant neoplasm of glottis                                 |
| B211.00 | Malignant neoplasm of supraglottis                            |
| B212.00 | Malignant neoplasm of subglottis                              |
| B213.00 | Malignant neoplasm of laryngeal cartilage                     |
| B213000 | Malignant neoplasm of arytenoid cartilage                     |
| B213100 | Malignant neoplasm of cricoid cartilage                       |
| B213300 | Malignant neoplasm of thyroid cartilage                       |
| B213z00 | Malignant neoplasm of laryngeal cartilage NOS                 |
| B214.00 | Malignant neoplasm, overlapping lesion of larynx              |
| B215.00 | Malignant neoplasm of epiglottis NOS                          |
| B21y.00 | Malignant neoplasm of larynx, other specified site            |
| B21z.00 | Malignant neoplasm of larynx NOS                              |
| B22.00  | Malignant neoplasm of trachea, bronchus and lung              |
| B220.00 | Malignant neoplasm of trachea                                 |
| B220z00 | Malignant neoplasm of trachea NOS                             |
| B221.00 | Malignant neoplasm of main bronchus                           |
| B221000 | Malignant neoplasm of carina of bronchus                      |
| B221100 | Malignant neoplasm of hilus of lung                           |
| B221z00 | Malignant neoplasm of main bronchus NOS                       |
| B222.00 | Malignant neoplasm of upper lobe, bronchus or lung            |
| B222.11 | Pancoast's syndrome                                           |
| B222000 | Malignant neoplasm of upper lobe bronchus                     |
| B222100 | Malignant neoplasm of upper lobe of lung                      |
| B222z00 | Malignant neoplasm of upper lobe, bronchus or lung NOS        |
| B223.00 | Malignant neoplasm of middle lobe, bronchus or lung           |
| B223000 | Malignant neoplasm of middle lobe bronchus                    |
| B223100 | Malignant neoplasm of middle lobe of lung                     |
| B223z00 | Malignant neoplasm of middle lobe, bronchus or lung NOS       |
| B224.00 | Malignant neoplasm of lower lobe, bronchus or lung            |
| B224000 | Malignant neoplasm of lower lobe bronchus                     |
| B224100 | Malignant neoplasm of lower lobe of lung                      |
| B224z00 | Malignant neoplasm of lower lobe, bronchus or lung NOS        |
| B225.00 | Malignant neoplasm of overlapping lesion of bronchus & lung   |
| B226.00 | Mesothelioma                                                  |
| B22y.00 | Malignant neoplasm of other sites of bronchus or lung         |
| B22z.00 | Malignant neoplasm of bronchus or lung NOS                    |
| B22z.11 | Lung cancer                                                   |
| B23.00  | Malignant neoplasm of pleura                                  |
| B230.00 | Malignant neoplasm of parietal pleura                         |
| B232.00 | Mesothelioma of pleura                                        |
| B23y.00 | Malignant neoplasm of other specified pleura                  |
| B23z.00 | Malignant neoplasm of pleura NOS                              |
| B24.00  | Malignant neoplasm of thymus, heart and mediastinum           |
| B240.00 | Malignant neoplasm of thymus                                  |
| B241.00 | Malignant neoplasm of heart                                   |
| B241000 | Malignant neoplasm of endocardium                             |
| B241200 | Malignant neoplasm of myocardium                              |
| B241300 | Malignant neoplasm of pericardium                             |
| B241z00 | Malignant neoplasm of heart NOS                               |
| B242.00 | Malignant neoplasm of anterior mediastinum                    |
| B243.00 | Malignant neoplasm of posterior mediastinum                   |
| B24X.00 | Malignant neoplasm of mediastinum, part unspecified           |
| B24y.00 | Malig neop of other site of heart, thymus and mediastinum     |
| B24z.00 | Malignant neoplasm of heart, thymus and mediastinum NOS       |
| B25.00  | Malig neo, overlapping lesion of heart, mediastinum & pleura  |
| B26.00  | Malignant neoplasm, overlap lesion of resp & intrathor organs |
| B2z.00  | Malig neop other/ill-defined sites resp/intrathoracic organs  |
| B2z0.00 | Malig neop of upper respiratory tract, part unspecified       |
| B2zy.00 | Malignant neoplasm of other site of respiratory tract         |
| B2zz.00 | Malignant neoplasm of respiratory tract NOS                   |



|         |                                                           |
|---------|-----------------------------------------------------------|
| B3...00 | Malig neop of bone, connective tissue, skin and breast    |
| B3...11 | Carcinoma of bone, connective tissue, skin and breast     |
| B3...12 | Sarcoma of bone and connective tissue                     |
| B30..00 | Malignant neoplasm of bone and articular cartilage        |
| B300.00 | Malignant neoplasm of bones of skull and face             |
| B300000 | Malignant neoplasm of ethmoid bone                        |
| B300100 | Malignant neoplasm of frontal bone                        |
| B300200 | Malignant neoplasm of malar bone                          |
| B300300 | Malignant neoplasm of nasal bone                          |
| B300400 | Malignant neoplasm of occipital bone                      |
| B300500 | Malignant neoplasm of orbital bone                        |
| B300600 | Malignant neoplasm of parietal bone                       |
| B300700 | Malignant neoplasm of sphenoid bone                       |
| B300800 | Malignant neoplasm of temporal bone                       |
| B300900 | Malignant neoplasm of zygomatic bone                      |
| B300A00 | Malignant neoplasm of maxilla                             |
| B300B00 | Malignant neoplasm of turbinate                           |
| B300C00 | Malignant neoplasm of vomer                               |
| B300z00 | Malignant neoplasm of bones of skull and face NOS         |
| B301.00 | Malignant neoplasm of mandible                            |
| B302.00 | Malignant neoplasm of vertebral column                    |
| B302000 | Malignant neoplasm of cervical vertebra                   |
| B302100 | Malignant neoplasm of thoracic vertebra                   |
| B302200 | Malignant neoplasm of lumbar vertebra                     |
| B302z00 | Malignant neoplasm of vertebral column NOS                |
| B303.00 | Malignant neoplasm of ribs, sternum and clavicle          |
| B303000 | Malignant neoplasm of rib                                 |
| B303100 | Malignant neoplasm of sternum                             |
| B303200 | Malignant neoplasm of clavicle                            |
| B303300 | Malignant neoplasm of costal cartilage                    |
| B303400 | Malignant neoplasm of costo-vertebral joint               |
| B303500 | Malignant neoplasm of xiphoid process                     |
| B303z00 | Malignant neoplasm of rib, sternum and clavicle NOS       |
| B304.00 | Malignant neoplasm of scapula and long bones of upper arm |
| B304000 | Malignant neoplasm of scapula                             |
| B304200 | Malignant neoplasm of humerus                             |
| B304300 | Malignant neoplasm of radius                              |
| B304400 | Malignant neoplasm of ulna                                |
| B304z00 | Malig neop of scapula and long bones of upper arm NOS     |
| B305.00 | Malignant neoplasm of hand bones                          |
| B305.12 | Malignant neoplasm of metacarpal bones                    |
| B305000 | Malignant neoplasm of carpal bone - scaphoid              |
| B305100 | Malignant neoplasm of carpal bone - lunate                |
| B305C00 | Malignant neoplasm of fifth metacarpal bone               |
| B305D00 | Malignant neoplasm of phalanges of hand                   |
| B305z00 | Malignant neoplasm of hand bones NOS                      |
| B306.00 | Malignant neoplasm of pelvic bones, sacrum and coccyx     |
| B306000 | Malignant neoplasm of ilium                               |
| B306100 | Malignant neoplasm of ischium                             |
| B306200 | Malignant neoplasm of pubis                               |
| B306300 | Malignant neoplasm of sacral vertebra                     |
| B306400 | Malignant neoplasm of coccygeal vertebra                  |
| B306z00 | Malignant neoplasm of pelvis, sacrum or coccyx NOS        |
| B307.00 | Malignant neoplasm of long bones of leg                   |
| B307000 | Malignant neoplasm of femur                               |
| B307100 | Malignant neoplasm of fibula                              |
| B307200 | Malignant neoplasm of tibia                               |
| B307z00 | Malignant neoplasm of long bones of leg NOS               |
| B308100 | Malignant neoplasm of talus                               |
| B308200 | Malignant neoplasm of calcaneum                           |
| B308300 | Malignant neoplasm of medial cuneiform                    |
| B308800 | Malignant neoplasm of first metatarsal bone               |

|         |                                                              |
|---------|--------------------------------------------------------------|
| B308B00 | Malignant neoplasm of fourth metatarsal bone                 |
| B308D00 | Malignant neoplasm of phalanges of foot                      |
| B30W.00 | Malignant neoplasm/overlap lesion/bone+articulr cartilage    |
| B30X.00 | Malignant neoplasm/bones+articular cartilage/limb,unspfd     |
| B30z.00 | Malignant neoplasm of bone and articular cartilage NOS       |
| B30z000 | Osteosarcoma                                                 |
| B31..00 | Malignant neoplasm of connective and other soft tissue       |
| B310.00 | Malig neop of connective and soft tissue head, face and neck |
| B310000 | Malignant neoplasm of soft tissue of head                    |
| B310100 | Malignant neoplasm of soft tissue of face                    |
| B310200 | Malignant neoplasm of soft tissue of neck                    |
| B310300 | Malignant neoplasm of cartilage of ear                       |
| B310400 | Malignant neoplasm of tarsus of eyelid                       |
| B310z00 | Malig neop connective and soft tissue head, face, neck NOS   |
| B311.00 | Malig neop connective and soft tissue upper limb/shoulder    |
| B311000 | Malignant neoplasm of connective and soft tissue of shoulder |
| B311100 | Malignant neoplasm of connective and soft tissue, upper arm  |
| B311200 | Malignant neoplasm of connective and soft tissue of fore-arm |
| B311300 | Malignant neoplasm of connective and soft tissue of hand     |
| B311400 | Malignant neoplasm of connective and soft tissue of finger   |
| B311500 | Malignant neoplasm of connective and soft tissue of thumb    |
| B312.00 | Malig neop of connective and soft tissue of hip and leg      |
| B312100 | Malig neop of connective and soft tissue thigh and upper leg |
| B312200 | Malig neop connective and soft tissue of popliteal space     |
| B312300 | Malig neop of connective and soft tissue of lower leg        |
| B312400 | Malignant neoplasm of connective and soft tissue of foot     |
| B312500 | Malignant neoplasm of connective and soft tissue of toe      |
| B312z00 | Malig neop connective and soft tissue hip and leg NOS        |
| B313.00 | Malignant neoplasm of connective and soft tissue of thorax   |
| B313000 | Malignant neoplasm of connective and soft tissue of axilla   |
| B313100 | Malignant neoplasm of diaphragm                              |
| B313200 | Malignant neoplasm of great vessels                          |
| B313z00 | Malig neop of connective and soft tissue of thorax NOS       |
| B314.00 | Malignant neoplasm of connective and soft tissue of abdomen  |
| B314000 | Malig neop of connective and soft tissue of abdominal wall   |
| B314100 | Malig neoplasm of connective and soft tissues of lumb spine  |
| B314z00 | Malig neop of connective and soft tissue of abdomen NOS      |
| B315.00 | Malignant neoplasm of connective and soft tissue of pelvis   |
| B315000 | Malignant neoplasm of connective and soft tissue of buttock  |
| B315100 | Malig neop of connective and soft tissue of inguinal region  |
| B315200 | Malignant neoplasm of connective and soft tissue of perineum |
| B315z00 | Malig neop of connective and soft tissue of pelvis NOS       |
| B316.00 | Malig neop of connective and soft tissue trunk unspecified   |
| B31y.00 | Malig neop connective and soft tissue other specified site   |
| B31z.00 | Malignant neoplasm of connective and soft tissue, site NOS   |
| B32..00 | Malignant melanoma of skin                                   |
| B320.00 | Malignant melanoma of lip                                    |
| B321.00 | Malignant melanoma of eyelid including canthus               |
| B322.00 | Malignant melanoma of ear and external auricular canal       |
| B322000 | Malignant melanoma of auricle (ear)                          |
| B322z00 | Malignant melanoma of ear and external auricular canal NOS   |
| B323.00 | Malignant melanoma of other and unspecified parts of face    |
| B323000 | Malignant melanoma of external surface of cheek              |
| B323100 | Malignant melanoma of chin                                   |
| B323200 | Malignant melanoma of eyebrow                                |
| B323300 | Malignant melanoma of forehead                               |
| B323400 | Malignant melanoma of external surface of nose               |
| B323500 | Malignant melanoma of temple                                 |
| B323z00 | Malignant melanoma of face NOS                               |
| B324.00 | Malignant melanoma of scalp and neck                         |
| B324000 | Malignant melanoma of scalp                                  |
| B324100 | Malignant melanoma of neck                                   |

|         |                                                             |
|---------|-------------------------------------------------------------|
| B324z00 | Malignant melanoma of scalp and neck NOS                    |
| B325.00 | Malignant melanoma of trunk (excluding scrotum)             |
| B325000 | Malignant melanoma of axilla                                |
| B325100 | Malignant melanoma of breast                                |
| B325200 | Malignant melanoma of buttock                               |
| B325300 | Malignant melanoma of groin                                 |
| B325500 | Malignant melanoma of perineum                              |
| B325600 | Malignant melanoma of umbilicus                             |
| B325700 | Malignant melanoma of back                                  |
| B325800 | Malignant melanoma of chest wall                            |
| B325z00 | Malignant melanoma of trunk, excluding scrotum, NOS         |
| B326.00 | Malignant melanoma of upper limb and shoulder               |
| B326000 | Malignant melanoma of shoulder                              |
| B326100 | Malignant melanoma of upper arm                             |
| B326200 | Malignant melanoma of fore-arm                              |
| B326300 | Malignant melanoma of hand                                  |
| B326400 | Malignant melanoma of finger                                |
| B326500 | Malignant melanoma of thumb                                 |
| B326z00 | Malignant melanoma of upper limb or shoulder NOS            |
| B327.00 | Malignant melanoma of lower limb and hip                    |
| B327000 | Malignant melanoma of hip                                   |
| B327100 | Malignant melanoma of thigh                                 |
| B327200 | Malignant melanoma of knee                                  |
| B327300 | Malignant melanoma of popliteal fossa area                  |
| B327400 | Malignant melanoma of lower leg                             |
| B327500 | Malignant melanoma of ankle                                 |
| B327600 | Malignant melanoma of heel                                  |
| B327700 | Malignant melanoma of foot                                  |
| B327800 | Malignant melanoma of toe                                   |
| B327900 | Malignant melanoma of great toe                             |
| B327z00 | Malignant melanoma of lower limb or hip NOS                 |
| B32y.00 | Malignant melanoma of other specified skin site             |
| B32y000 | Overlapping malignant melanoma of skin                      |
| B32z.00 | Malignant melanoma of skin NOS                              |
| B33..00 | Other malignant neoplasm of skin                            |
| B33..11 | Basal cell carcinoma                                        |
| B33..12 | Epithelioma                                                 |
| B33..13 | Rodent ulcer                                                |
| B33..14 | Malignant neoplasm of sebaceous gland                       |
| B33..15 | Malignant neoplasm of sweat gland                           |
| B33..16 | Epithelioma basal cell                                      |
| B330.00 | Malignant neoplasm of skin of lip                           |
| B331.00 | Malignant neoplasm of eyelid including canthus              |
| B331000 | Malignant neoplasm of canthus                               |
| B331100 | Malignant neoplasm of upper eyelid                          |
| B331200 | Malignant neoplasm of lower eyelid                          |
| B332.00 | Malignant neoplasm skin of ear and external auricular canal |
| B332000 | Malignant neoplasm of skin of auricle (ear)                 |
| B332100 | Malignant neoplasm of skin of external auditory meatus      |
| B332200 | Malignant neoplasm of pinna NEC                             |
| B332z00 | Malig neop skin of ear and external auricular canal NOS     |
| B333.00 | Malignant neoplasm skin of other and unspecified parts face |
| B333000 | Malignant neoplasm of skin of cheek, external               |
| B333100 | Malignant neoplasm of skin of chin                          |
| B333200 | Malignant neoplasm of skin of eyebrow                       |
| B333300 | Malignant neoplasm of skin of forehead                      |
| B333400 | Malignant neoplasm of skin of nose (external)               |
| B333500 | Malignant neoplasm of skin of temple                        |
| B333z00 | Malignant neoplasm skin other and unspec part of face NOS   |
| B334.00 | Malignant neoplasm of scalp and skin of neck                |
| B334000 | Malignant neoplasm of scalp                                 |
| B334100 | Malignant neoplasm of skin of neck                          |

|         |                                                             |
|---------|-------------------------------------------------------------|
| B334z00 | Malignant neoplasm of scalp or skin of neck NOS             |
| B335.00 | Malignant neoplasm of skin of trunk, excluding scrotum      |
| B335000 | Malignant neoplasm of skin of axillary fold                 |
| B335100 | Malignant neoplasm of skin of chest, excluding breast       |
| B335200 | Malignant neoplasm of skin of breast                        |
| B335300 | Malignant neoplasm of skin of abdominal wall                |
| B335400 | Malignant neoplasm of skin of umbilicus                     |
| B335500 | Malignant neoplasm of skin of groin                         |
| B335600 | Malignant neoplasm of skin of perineum                      |
| B335700 | Malignant neoplasm of skin of back                          |
| B335800 | Malignant neoplasm of skin of buttock                       |
| B335900 | Malignant neoplasm of perianal skin                         |
| B335A00 | Malignant neoplasm of skin of scapular region               |
| B335z00 | Malignant neoplasm of skin of trunk, excluding scrotum, NOS |
| B336.00 | Malignant neoplasm of skin of upper limb and shoulder       |
| B336000 | Malignant neoplasm of skin of shoulder                      |
| B336100 | Malignant neoplasm of skin of upper arm                     |
| B336200 | Malignant neoplasm of skin of fore-arm                      |
| B336300 | Malignant neoplasm of skin of hand                          |
| B336400 | Malignant neoplasm of skin of finger                        |
| B336500 | Malignant neoplasm of skin of thumb                         |
| B336z00 | Malignant neoplasm of skin of upper limb or shoulder NOS    |
| B337.00 | Malignant neoplasm of skin of lower limb and hip            |
| B337000 | Malignant neoplasm of skin of hip                           |
| B337100 | Malignant neoplasm of skin of thigh                         |
| B337200 | Malignant neoplasm of skin of knee                          |
| B337300 | Malignant neoplasm of skin of popliteal fossa area          |
| B337400 | Malignant neoplasm of skin of lower leg                     |
| B337500 | Malignant neoplasm of skin of ankle                         |
| B337700 | Malignant neoplasm of skin of foot                          |
| B337800 | Malignant neoplasm of skin of toe                           |
| B337900 | Malignant neoplasm of skin of great toe                     |
| B337z00 | Malignant neoplasm of skin of lower limb or hip NOS         |
| B338.00 | Squamous cell carcinoma of skin                             |
| B339.00 | Dermatofibrosarcoma protuberans                             |
| B33X.00 | Malignant neoplasm overlapping lesion of skin               |
| B33y.00 | Malignant neoplasm of other specified skin sites            |
| B33z.00 | Malignant neoplasm of skin NOS                              |
| B33z.11 | Squamous cell carcinoma of skin NOS                         |
| B33z000 | Kaposi's sarcoma of skin                                    |
| B33z100 | Naevoid basal cell carcinoma syndrome                       |
| B33z111 | Basal cell naevus syndrome                                  |
| B34..00 | Malignant neoplasm of female breast                         |
| B34..11 | Ca female breast                                            |
| B340.00 | Malignant neoplasm of nipple and areola of female breast    |
| B340000 | Malignant neoplasm of nipple of female breast               |
| B340100 | Malignant neoplasm of areola of female breast               |
| B340z00 | Malignant neoplasm of nipple or areola of female breast NOS |
| B341.00 | Malignant neoplasm of central part of female breast         |
| B342.00 | Malignant neoplasm of upper-inner quadrant of female breast |
| B343.00 | Malignant neoplasm of lower-inner quadrant of female breast |
| B344.00 | Malignant neoplasm of upper-outer quadrant of female breast |
| B345.00 | Malignant neoplasm of lower-outer quadrant of female breast |
| B346.00 | Malignant neoplasm of axillary tail of female breast        |
| B347.00 | Malignant neoplasm, overlapping lesion of breast            |
| B34y.00 | Malignant neoplasm of other site of female breast           |
| B34y000 | Malignant neoplasm of ectopic site of female breast         |
| B34yz00 | Malignant neoplasm of other site of female breast NOS       |
| B34z.00 | Malignant neoplasm of female breast NOS                     |
| B35..00 | Malignant neoplasm of male breast                           |
| B350.00 | Malignant neoplasm of nipple and areola of male breast      |
| B350000 | Malignant neoplasm of nipple of male breast                 |

|         |                                                              |
|---------|--------------------------------------------------------------|
| B350100 | Malignant neoplasm of areola of male breast                  |
| B35z.00 | Malignant neoplasm of other site of male breast              |
| B35z000 | Malignant neoplasm of ectopic site of male breast            |
| B35zz00 | Malignant neoplasm of male breast NOS                        |
| B3y..00 | Malig neop of bone, connective tissue, skin and breast OS    |
| B3z..00 | Malig neop of bone, connective tissue, skin and breast NOS   |
| B4...00 | Malignant neoplasm of genitourinary organ                    |
| B4...11 | Carcinoma of genitourinary organ                             |
| B40..00 | Malignant neoplasm of uterus, part unspecified               |
| B41..00 | Malignant neoplasm of cervix uteri                           |
| B41..11 | Cervical carcinoma (uterus)                                  |
| B410.00 | Malignant neoplasm of endocervix                             |
| B410000 | Malignant neoplasm of endocervical canal                     |
| B410100 | Malignant neoplasm of endocervical gland                     |
| B410z00 | Malignant neoplasm of endocervix NOS                         |
| B411.00 | Malignant neoplasm of exocervix                              |
| B412.00 | Malignant neoplasm, overlapping lesion of cervix uteri       |
| B41y.00 | Malignant neoplasm of other site of cervix                   |
| B41y000 | Malignant neoplasm of cervical stump                         |
| B41y100 | Malignant neoplasm of squamocolumnar junction of cervix      |
| B41yz00 | Malignant neoplasm of other site of cervix NOS               |
| B41z.00 | Malignant neoplasm of cervix uteri NOS                       |
| B42..00 | Malignant neoplasm of placenta                               |
| B420.00 | Choriocarcinoma                                              |
| B43..00 | Malignant neoplasm of body of uterus                         |
| B430.00 | Malignant neoplasm of corpus uteri, excluding isthmus        |
| B430000 | Malignant neoplasm of cornu of corpus uteri                  |
| B430100 | Malignant neoplasm of fundus of corpus uteri                 |
| B430200 | Malignant neoplasm of endometrium of corpus uteri            |
| B430211 | Malignant neoplasm of endometrium                            |
| B430300 | Malignant neoplasm of myometrium of corpus uteri             |
| B430z00 | Malignant neoplasm of corpus uteri NOS                       |
| B431.00 | Malignant neoplasm of isthmus of uterine body                |
| B431000 | Malignant neoplasm of lower uterine segment                  |
| B431z00 | Malignant neoplasm of isthmus of uterine body NOS            |
| B432.00 | Malignant neoplasm of overlapping lesion of corpus uteri     |
| B43y.00 | Malignant neoplasm of other site of uterine body             |
| B43z.00 | Malignant neoplasm of body of uterus NOS                     |
| B44..00 | Malignant neoplasm of ovary and other uterine adnexa         |
| B440.00 | Malignant neoplasm of ovary                                  |
| B440.11 | Cancer of ovary                                              |
| B441.00 | Malignant neoplasm of fallopian tube                         |
| B443.00 | Malignant neoplasm of parametrium                            |
| B44y.00 | Malignant neoplasm of other site of uterine adnexa           |
| B44z.00 | Malignant neoplasm of uterine adnexa NOS                     |
| B45..00 | Malig neop of other and unspecified female genital organs    |
| B450.00 | Malignant neoplasm of vagina                                 |
| B450100 | Malignant neoplasm of vaginal vault                          |
| B450z00 | Malignant neoplasm of vagina NOS                             |
| B451.00 | Malignant neoplasm of labia majora                           |
| B451000 | Malignant neoplasm of greater vestibular (Bartholin's) gland |
| B451z00 | Malignant neoplasm of labia majora NOS                       |
| B452.00 | Malignant neoplasm of labia minora                           |
| B453.00 | Malignant neoplasm of clitoris                               |
| B454.00 | Malignant neoplasm of vulva unspecified                      |
| B454.11 | Primary vulval cancer                                        |
| B45X.00 | Malignant neoplasm/overlapping lesion/feml genital organs    |
| B45y.00 | Malignant neoplasm of other specified female genital organ   |
| B45y000 | Malignant neoplasm of overlapping lesion of vulva            |
| B45z.00 | Malignant neoplasm of female genital organ NOS               |
| B46..00 | Malignant neoplasm of prostate                               |
| B47..00 | Malignant neoplasm of testis                                 |

|         |                                                              |
|---------|--------------------------------------------------------------|
| B470.00 | Malignant neoplasm of undescended testis                     |
| B470200 | Seminoma of undescended testis                               |
| B470z00 | Malignant neoplasm of undescended testis NOS                 |
| B471.00 | Malignant neoplasm of descended testis                       |
| B471000 | Seminoma of descended testis                                 |
| B471z00 | Malignant neoplasm of descended testis NOS                   |
| B47z.00 | Malignant neoplasm of testis NOS                             |
| B47z.11 | Seminoma of testis                                           |
| B48..00 | Malignant neoplasm of penis and other male genital organs    |
| B480.00 | Malignant neoplasm of prepuce (foreskin)                     |
| B481.00 | Malignant neoplasm of glans penis                            |
| B482.00 | Malignant neoplasm of body of penis                          |
| B483.00 | Malignant neoplasm of penis, part unspecified                |
| B484.00 | Malignant neoplasm of epididymis                             |
| B485.00 | Malignant neoplasm of spermatic cord                         |
| B486.00 | Malignant neoplasm of scrotum                                |
| B487.00 | Malignant neoplasm, overlapping lesion of penis              |
| B48y.00 | Malignant neoplasm of other male genital organ               |
| B48y000 | Malignant neoplasm of seminal vesicle                        |
| B48y100 | Malignant neoplasm of tunica vaginalis                       |
| B48y200 | Malignant neoplasm, overlapping lesion male genital orgs     |
| B48yz00 | Malignant neoplasm of other male genital organ NOS           |
| B48z.00 | Malignant neoplasm of penis and other male genital organ NOS |
| B49..00 | Malignant neoplasm of urinary bladder                        |
| B490.00 | Malignant neoplasm of trigone of urinary bladder             |
| B491.00 | Malignant neoplasm of dome of urinary bladder                |
| B492.00 | Malignant neoplasm of lateral wall of urinary bladder        |
| B493.00 | Malignant neoplasm of anterior wall of urinary bladder       |
| B494.00 | Malignant neoplasm of posterior wall of urinary bladder      |
| B495.00 | Malignant neoplasm of bladder neck                           |
| B496.00 | Malignant neoplasm of ureteric orifice                       |
| B497.00 | Malignant neoplasm of urachus                                |
| B49y.00 | Malignant neoplasm of other site of urinary bladder          |
| B49y000 | Malignant neoplasm, overlapping lesion of bladder            |
| B49z.00 | Malignant neoplasm of urinary bladder NOS                    |
| B4A..00 | Malig neop of kidney and other unspecified urinary organs    |
| B4A..11 | Renal malignant neoplasm                                     |
| B4A0.00 | Malignant neoplasm of kidney parenchyma                      |
| B4A0000 | Hypernephroma                                                |
| B4A1.00 | Malignant neoplasm of renal pelvis                           |
| B4A1000 | Malignant neoplasm of renal calyces                          |
| B4A1z00 | Malignant neoplasm of renal pelvis NOS                       |
| B4A2.00 | Malignant neoplasm of ureter                                 |
| B4A3.00 | Malignant neoplasm of urethra                                |
| B4A4.00 | Malignant neoplasm of paraurethral glands                    |
| B4Ay.00 | Malignant neoplasm of other urinary organs                   |
| B4Ay000 | Malignant neoplasm of overlapping lesion of urinary organs   |
| B4Az.00 | Malignant neoplasm of kidney or urinary organs NOS           |
| B4y..00 | Malignant neoplasm of genitourinary organ OS                 |
| B4z..00 | Malignant neoplasm of genitourinary organ NOS                |
| B5...00 | Malignant neoplasm of other and unspecified sites            |
| B5...11 | Carcinoma of other and unspecified sites                     |
| B50..00 | Malignant neoplasm of eye                                    |
| B500.00 | Malig neop eyeball excl conjunctiva, cornea, retina, choroid |
| B500000 | Malignant neoplasm of ciliary body                           |
| B500100 | Malignant neoplasm of iris                                   |
| B500z00 | Malignant neoplasm of eyeball NOS                            |
| B501.00 | Malignant neoplasm of orbit                                  |
| B501000 | Malignant neoplasm of connective tissue of orbit             |
| B501z00 | Malignant neoplasm of orbit NOS                              |
| B502.00 | Malignant neoplasm of lacrimal gland                         |
| B503.00 | Malignant neoplasm of conjunctiva                            |

|         |                                                               |
|---------|---------------------------------------------------------------|
| B504.00 | Malignant neoplasm of cornea                                  |
| B505.00 | Malignant neoplasm of retina                                  |
| B506.00 | Malignant neoplasm of choroid                                 |
| B507.00 | Malignant neoplasm of lacrimal duct                           |
| B507100 | Malignant neoplasm of nasolacrimal duct                       |
| B508.00 | Malignant neoplasm, overlapping lesion of eye and adnexa      |
| B50y.00 | Malignant neoplasm of other specified site of eye             |
| B50z.00 | Malignant neoplasm of eye NOS                                 |
| B51..00 | Malignant neoplasm of brain                                   |
| B51..11 | Cerebral tumour - malignant                                   |
| B510.00 | Malignant neoplasm cerebrum (excluding lobes and ventricles)  |
| B510000 | Malignant neoplasm of basal ganglia                           |
| B510100 | Malignant neoplasm of cerebral cortex                         |
| B510300 | Malignant neoplasm of globus pallidus                         |
| B510400 | Malignant neoplasm of hypothalamus                            |
| B510500 | Malignant neoplasm of thalamus                                |
| B510z00 | Malignant neoplasm of cerebrum NOS                            |
| B511.00 | Malignant neoplasm of frontal lobe                            |
| B512.00 | Malignant neoplasm of temporal lobe                           |
| B512000 | Malignant neoplasm of hippocampus                             |
| B512z00 | Malignant neoplasm of temporal lobe NOS                       |
| B513.00 | Malignant neoplasm of parietal lobe                           |
| B514.00 | Malignant neoplasm of occipital lobe                          |
| B515.00 | Malignant neoplasm of cerebral ventricles                     |
| B515000 | Malignant neoplasm of choroid plexus                          |
| B516.00 | Malignant neoplasm of cerebellum                              |
| B517.00 | Malignant neoplasm of brain stem                              |
| B517000 | Malignant neoplasm of cerebral peduncle                       |
| B517100 | Malignant neoplasm of medulla oblongata                       |
| B517200 | Malignant neoplasm of midbrain                                |
| B517300 | Malignant neoplasm of pons                                    |
| B517z00 | Malignant neoplasm of brain stem NOS                          |
| B51y.00 | Malignant neoplasm of other parts of brain                    |
| B51y000 | Malignant neoplasm of corpus callosum                         |
| B51y200 | Malignant neoplasm, overlapping lesion of brain               |
| B51yz00 | Malignant neoplasm of other part of brain NOS                 |
| B51z.00 | Malignant neoplasm of brain NOS                               |
| B52..00 | Malig neop of other and unspecified parts of nervous system   |
| B520.00 | Malignant neoplasm of cranial nerves                          |
| B520000 | Malignant neoplasm of olfactory bulb                          |
| B520100 | Malignant neoplasm of optic nerve                             |
| B520200 | Malignant neoplasm of acoustic nerve                          |
| B520z00 | Malignant neoplasm of cranial nerves NOS                      |
| B521.00 | Malignant neoplasm of cerebral meninges                       |
| B521z00 | Malignant neoplasm of cerebral meninges NOS                   |
| B522.00 | Malignant neoplasm of spinal cord                             |
| B523.00 | Malignant neoplasm of spinal meninges                         |
| B523z00 | Malignant neoplasm of spinal meninges NOS                     |
| B524.00 | Malig neopl peripheral nerves and autonomic nervous system    |
| B524000 | Malignant neoplasm of peripheral nerves of head, face & neck  |
| B524100 | Malignant neoplasm of peripheral nerve, upp limb, incl should |
| B524200 | Malignant neoplasm of peripheral nerve of low limb, incl hip  |
| B524300 | Malignant neoplasm of peripheral nerve of thorax              |
| B524400 | Malignant neoplasm of peripheral nerve of abdomen             |
| B524500 | Malignant neoplasm of peripheral nerve of pelvis              |
| B524600 | Malignant neoplasm, overlap lesion periph nerve & auton ns    |
| B525.00 | Malignant neoplasm of cauda equina                            |
| B52W.00 | Malig neopl, overlap lesion brain & other part of CNS         |
| B52X.00 | Malignant neoplasm of meninges, unspecified                   |
| B52y.00 | Malignant neoplasm of other specified part of nervous system  |
| B52z.00 | Malignant neoplasm of nervous system NOS                      |
| B53..00 | Malignant neoplasm of thyroid gland                           |

|         |                                                              |
|---------|--------------------------------------------------------------|
| B54..00 | Malig neop of other endocrine glands and related structures  |
| B540.00 | Malignant neoplasm of adrenal gland                          |
| B540.11 | Phaeochromocytoma                                            |
| B540000 | Malignant neoplasm of adrenal cortex                         |
| B540100 | Malignant neoplasm of adrenal medulla                        |
| B540z00 | Malignant neoplasm of adrenal gland NOS                      |
| B541.00 | Malignant neoplasm of parathyroid gland                      |
| B542.00 | Malignant neoplasm pituitary gland and craniopharyngeal duct |
| B542000 | Malignant neoplasm of pituitary gland                        |
| B542100 | Malignant neoplasm of craniopharyngeal duct                  |
| B542z00 | Malig neop pituitary gland or craniopharyngeal duct NOS      |
| B543.00 | Malignant neoplasm of pineal gland                           |
| B544.00 | Malignant neoplasm of carotid body                           |
| B545.00 | Malignant neoplasm of aortic body and other paraganglia      |
| B545000 | Malignant neoplasm of glomus jugulare                        |
| B545100 | Malignant neoplasm of aortic body                            |
| B545200 | Malignant neoplasm of coccygeal body                         |
| B54X.00 | Malignant neoplasm-pluriglandular involvement,unspecified    |
| B54y.00 | Malignant neoplasm of other specified endocrine gland        |
| B54z.00 | Malig neop of endocrine gland or related structure NOS       |
| B55..00 | Malignant neoplasm of other and ill-defined sites            |
| B550.00 | Malignant neoplasm of head, neck and face                    |
| B550000 | Malignant neoplasm of head NOS                               |
| B550100 | Malignant neoplasm of cheek NOS                              |
| B550200 | Malignant neoplasm of nose NOS                               |
| B550300 | Malignant neoplasm of jaw NOS                                |
| B550400 | Malignant neoplasm of neck NOS                               |
| B550500 | Malignant neoplasm of supraclavicular fossa NOS              |
| B550z00 | Malignant neoplasm of head, neck and face NOS                |
| B551.00 | Malignant neoplasm of thorax                                 |
| B551000 | Malignant neoplasm of axilla NOS                             |
| B551100 | Malignant neoplasm of chest wall NOS                         |
| B551200 | Malignant neoplasm of intrathoracic site NOS                 |
| B551z00 | Malignant neoplasm of thorax NOS                             |
| B552.00 | Malignant neoplasm of abdomen                                |
| B553.00 | Malignant neoplasm of pelvis                                 |
| B553000 | Malignant neoplasm of inguinal region NOS                    |
| B553100 | Malignant neoplasm of presacral region                       |
| B553z00 | Malignant neoplasm of pelvis NOS                             |
| B554.00 | Malignant neoplasm of upper limb NOS                         |
| B555.00 | Malignant neoplasm of lower limb NOS                         |
| B55y.00 | Malignant neoplasm of other specified sites                  |
| B55y000 | Malignant neoplasm of back NOS                               |
| B55y100 | Malignant neoplasm of trunk NOS                              |
| B55y200 | Malignant neoplasm of flank NOS                              |
| B55yz00 | Malignant neoplasm of specified site NOS                     |
| B55z.00 | Malignant neoplasm of other and ill defined site NOS         |
| B56..00 | Secondary and unspecified malignant neoplasm of lymph nodes  |
| B56..11 | Lymph node metastases                                        |
| B560.00 | Secondary and unspec malig neop lymph nodes head/face/neck   |
| B560000 | Secondary and unspec malig neop of superficial parotid LN    |
| B560100 | Secondary and unspec malignant neoplasm mastoid lymph nodes  |
| B560200 | Secondary and unspec malig neop superficial cervical LN      |
| B560300 | Secondary and unspec malignant neoplasm occipital lymph node |
| B560400 | Secondary and unspec malig neop deep parotid lymph nodes     |
| B560500 | Secondary and unspec malig neop submandibular lymph nodes    |
| B560600 | Secondary and unspec malig neop of facial lymph nodes        |
| B560700 | Secondary and unspec malig neop submental lymph nodes        |
| B560800 | Secondary and unspec malig neop anterior cervical LN         |
| B560900 | Secondary and unspec malig neop deep cervical LN             |
| B560z00 | Secondary unspec malig neop lymph nodes head/face/neck NOS   |
| B561.00 | Secondary and unspec malig neop intrathoracic lymph nodes    |



|         |                                                              |
|---------|--------------------------------------------------------------|
| B561000 | Secondary and unspec malig neop internal mammary lymph nodes |
| B561200 | Secondary and unspec malig neop diaphragmatic lymph nodes    |
| B561300 | Secondary and unspec malig neop ant mediastinal lymph nodes  |
| B561400 | Secondary and unspec malig neop post mediastinal lymph nodes |
| B561500 | Secondary and unspec malig neop paratracheal lymph nodes     |
| B561600 | Secondary and unspec malig neop superfic tracheobronchial LN |
| B561700 | Secondary and unspec malig neop inferior tracheobronchial LN |
| B561800 | Secondary and unspec malig neop bronchopulmonary lymph nodes |
| B561900 | Secondary and unspec malig neop pulmonary lymph nodes        |
| B561z00 | Secondary and unspec malig neop intrathoracic LN NOS         |
| B562.00 | Secondary and unspec malig neop intra-abdominal lymph nodes  |
| B562000 | Secondary and unspec malig neop coeliac lymph nodes          |
| B562100 | Secondary and unspec malig neop superficial mesenteric LN    |
| B562200 | Secondary and unspec malig neop inferior mesenteric LN       |
| B562300 | Secondary and unspec malig neop common iliac lymph nodes     |
| B562400 | Secondary and unspec malig neop external iliac lymph nodes   |
| B562z00 | Secondary and unspec malig neop intra-abdominal LN NOS       |
| B563.00 | Secondary and unspec malig neop axilla and upper limb LN     |
| B563000 | Secondary and unspec malig neop axillary lymph nodes         |
| B563100 | Secondary and unspec malig neop supratrochlear lymph nodes   |
| B563200 | Secondary and unspec malig neop infraclavicular lymph nodes  |
| B563300 | Secondary and unspec malig neop pectoral lymph nodes         |
| B563z00 | Secondary and unspec malig neop axilla and upper limb LN NOS |
| B564.00 | Secondary and unspec malig neop inguinal and lower limb LN   |
| B564000 | Secondary and unspec malig neop superficial inguinal LN      |
| B564100 | Secondary and unspec malig neop deep inguinal lymph nodes    |
| B564z00 | Secondary and unspec malig neop of inguinal and leg LN NOS   |
| B565.00 | Secondary and unspec malig neop intrapelvic lymph nodes      |
| B565000 | Secondary and unspec malig neop internal iliac lymph nodes   |
| B565300 | Secondary and unspec malig neop sacral lymph nodes           |
| B565z00 | Secondary and unspec malig neop intrapelvic LN NOS           |
| B56y.00 | Secondary and unspec malig neop lymph nodes multiple sites   |
| B56z.00 | Secondary and unspec malig neop lymph nodes NOS              |
| B57..00 | Secondary malig neop of respiratory and digestive systems    |
| B57..11 | Metastases of respiratory and/or digestive systems           |
| B57..12 | Secondary carcinoma of respiratory and/or digestive systems  |
| B570.00 | Secondary malignant neoplasm of lung                         |
| B571.00 | Secondary malignant neoplasm of mediastinum                  |
| B572.00 | Secondary malignant neoplasm of pleura                       |
| B573.00 | Secondary malignant neoplasm of other respiratory organs     |
| B574.00 | Secondary malignant neoplasm of small intestine and duodenum |
| B574000 | Secondary malignant neoplasm of duodenum                     |
| B574200 | Secondary malignant neoplasm of ileum                        |
| B574z00 | Secondary malig neop of small intestine or duodenum NOS      |
| B575.00 | Secondary malignant neoplasm of large intestine and rectum   |
| B575000 | Secondary malignant neoplasm of colon                        |
| B575100 | Secondary malignant neoplasm of rectum                       |
| B575z00 | Secondary malig neop of large intestine or rectum NOS        |
| B576.00 | Secondary malig neop of retroperitoneum and peritoneum       |
| B576000 | Secondary malignant neoplasm of retroperitoneum              |
| B576100 | Secondary malignant neoplasm of peritoneum                   |
| B576200 | Malignant ascites                                            |
| B576z00 | Secondary malig neop of retroperitoneum or peritoneum NOS    |
| B577.00 | Secondary malignant neoplasm of liver                        |
| B577.11 | Liver metastases                                             |
| B57y.00 | Secondary malignant neoplasm of other digestive organ        |
| B57z.00 | Secondary malig neop of respiratory or digestive system NOS  |
| B58..00 | Secondary malignant neoplasm of other specified sites        |
| B58..11 | Secondary carcinoma of other specified sites                 |
| B580.00 | Secondary malignant neoplasm of kidney                       |
| B581.00 | Secondary malignant neoplasm of other urinary organs         |
| B581000 | Secondary malignant neoplasm of ureter                       |

|         |                                                              |
|---------|--------------------------------------------------------------|
| B581100 | Secondary malignant neoplasm of bladder                      |
| B581200 | Secondary malignant neoplasm of urethra                      |
| B581z00 | Secondary malignant neoplasm of other urinary organ NOS      |
| B582.00 | Secondary malignant neoplasm of skin                         |
| B582000 | Secondary malignant neoplasm of skin of head                 |
| B582100 | Secondary malignant neoplasm of skin of face                 |
| B582200 | Secondary malignant neoplasm of skin of neck                 |
| B582300 | Secondary malignant neoplasm of skin of trunk                |
| B582400 | Secondary malignant neoplasm of skin of shoulder and arm     |
| B582500 | Secondary malignant neoplasm of skin of hip and leg          |
| B582600 | Secondary malignant neoplasm of skin of breast               |
| B582z00 | Secondary malignant neoplasm of skin NOS                     |
| B583.00 | Secondary malignant neoplasm of brain and spinal cord        |
| B583000 | Secondary malignant neoplasm of brain                        |
| B583100 | Secondary malignant neoplasm of spinal cord                  |
| B583200 | Cerebral metastasis                                          |
| B583z00 | Secondary malignant neoplasm of brain or spinal cord NOS     |
| B584.00 | Secondary malignant neoplasm of other part of nervous system |
| B585.00 | Secondary malignant neoplasm of bone and bone marrow         |
| B585000 | Pathological fracture due to metastatic bone disease         |
| B586.00 | Secondary malignant neoplasm of ovary                        |
| B587.00 | Secondary malignant neoplasm of adrenal gland                |
| B58y.00 | Secondary malignant neoplasm of other specified sites        |
| B58y000 | Secondary malignant neoplasm of breast                       |
| B58y100 | Secondary malignant neoplasm of uterus                       |
| B58y200 | Secondary malignant neoplasm of cervix uteri                 |
| B58y211 | Secondary cancer of the cervix                               |
| B58y300 | Secondary malignant neoplasm of vagina                       |
| B58y400 | Secondary malignant neoplasm of vulva                        |
| B58y411 | Secondary cancer of the vulva                                |
| B58y500 | Secondary malignant neoplasm of prostate                     |
| B58y600 | Secondary malignant neoplasm of testis                       |
| B58y700 | Secondary malignant neoplasm of penis                        |
| B58y900 | Secondary malignant neoplasm of tongue                       |
| B58yz00 | Secondary malignant neoplasm of other specified site NOS     |
| B58z.00 | Secondary malignant neoplasm of other specified site NOS     |
| B59..00 | Malignant neoplasm of unspecified site                       |
| B590.00 | Disseminated malignancy NOS                                  |
| B590.11 | Carcinomatosis                                               |
| B591.00 | Other malignant neoplasm NOS                                 |
| B592.00 | Malignant neoplasms of independent (primary) multiple sites  |
| B592X00 | Kaposi's sarcoma of multiple organs                          |
| B593.00 | Primary malignant neoplasm of unknown site                   |
| B594.00 | Secondary malignant neoplasm of unknown site                 |
| B59z.00 | Malignant neoplasm of unspecified site NOS                   |
| B59zX00 | Kaposi's sarcoma, unspecified                                |
| B5y..00 | Malignant neoplasm of other and unspecified site OS          |
| B5z..00 | Malignant neoplasm of other and unspecified site NOS         |
| B6...00 | Malignant neoplasm of lymphatic and haemopoietic tissue      |
| B6...11 | Malignant neoplasm of histiocytic tissue                     |
| B60..00 | Lymphosarcoma and reticulosarcoma                            |
| B600.00 | Reticulosarcoma                                              |
| B600000 | Reticulosarcoma of unspecified site                          |
| B600100 | Reticulosarcoma of lymph nodes of head, face and neck        |
| B600300 | Reticulosarcoma of intra-abdominal lymph nodes               |
| B600700 | Reticulosarcoma of spleen                                    |
| B600z00 | Reticulosarcoma NOS                                          |
| B601.00 | Lymphosarcoma                                                |
| B601000 | Lymphosarcoma of unspecified site                            |
| B601100 | Lymphosarcoma of lymph nodes of head, face and neck          |
| B601200 | Lymphosarcoma of intrathoracic lymph nodes                   |
| B601300 | Lymphosarcoma of intra-abdominal lymph nodes                 |

|         |                                                              |
|---------|--------------------------------------------------------------|
| B601500 | Lymphosarcoma of lymph nodes of inguinal region and leg      |
| B601z00 | Lymphosarcoma NOS                                            |
| B602.00 | Burkitt's lymphoma                                           |
| B602100 | Burkitt's lymphoma of lymph nodes of head, face and neck     |
| B602200 | Burkitt's lymphoma of intrathoracic lymph nodes              |
| B602300 | Burkitt's lymphoma of intra-abdominal lymph nodes            |
| B602500 | Burkitt's lymphoma of lymph nodes of inguinal region and leg |
| B602z00 | Burkitt's lymphoma NOS                                       |
| B60y.00 | Other specified reticulosarcoma or lymphosarcoma             |
| B60z.00 | Reticulosarcoma or lymphosarcoma NOS                         |
| B61..00 | Hodgkin's disease                                            |
| B610.00 | Hodgkin's paragranuloma                                      |
| B610100 | Hodgkin's paragranuloma of lymph nodes of head, face, neck   |
| B610300 | Hodgkin's paragranuloma of intra-abdominal lymph nodes       |
| B611.00 | Hodgkin's granuloma                                          |
| B611100 | Hodgkin's granuloma of lymph nodes of head, face and neck    |
| B612.00 | Hodgkin's sarcoma                                            |
| B612400 | Hodgkin's sarcoma of lymph nodes of axilla and upper limb    |
| B613.00 | Hodgkin's disease, lymphocytic-histiocytic predominance      |
| B613000 | Hodgkin's, lymphocytic-histiocytic predominance unspec site  |
| B613100 | Hodgkin's, lymphocytic-histiocytic pred of head, face, neck  |
| B613200 | Hodgkin's, lymphocytic-histiocytic pred intrathoracic nodes  |
| B613300 | Hodgkin's, lymphocytic-histiocytic pred intra-abdominal node |
| B613500 | Hodgkin's, lymphocytic-histiocytic pred inguinal and leg     |
| B613600 | Hodgkin's, lymphocytic-histiocytic pred intrapelvic nodes    |
| B613z00 | Hodgkin's, lymphocytic-histiocytic predominance NOS          |
| B614.00 | Hodgkin's disease, nodular sclerosis                         |
| B614000 | Hodgkin's disease, nodular sclerosis of unspecified site     |
| B614100 | Hodgkin's nodular sclerosis of head, face and neck           |
| B614200 | Hodgkin's nodular sclerosis of intrathoracic lymph nodes     |
| B614300 | Hodgkin's nodular sclerosis of intra-abdominal lymph nodes   |
| B614400 | Hodgkin's nodular sclerosis of lymph nodes of axilla and arm |
| B614800 | Hodgkin's nodular sclerosis of lymph nodes of multiple sites |
| B614z00 | Hodgkin's disease, nodular sclerosis NOS                     |
| B615.00 | Hodgkin's disease, mixed cellularity                         |
| B615000 | Hodgkin's disease, mixed cellularity of unspecified site     |
| B615100 | Hodgkin's mixed cellularity of lymph nodes head, face, neck  |
| B615200 | Hodgkin's mixed cellularity of intrathoracic lymph nodes     |
| B615z00 | Hodgkin's disease, mixed cellularity NOS                     |
| B616.00 | Hodgkin's disease, lymphocytic depletion                     |
| B616000 | Hodgkin's lymphocytic depletion of unspecified site          |
| B616400 | Hodgkin's lymphocytic depletion lymph nodes axilla and arm   |
| B616z00 | Hodgkin's disease, lymphocytic depletion NOS                 |
| B61z.00 | Hodgkin's disease NOS                                        |
| B61z000 | Hodgkin's disease NOS, unspecified site                      |
| B61z100 | Hodgkin's disease NOS of lymph nodes of head, face and neck  |
| B61z200 | Hodgkin's disease NOS of intrathoracic lymph nodes           |
| B61z400 | Hodgkin's disease NOS of lymph nodes of axilla and arm       |
| B61z500 | Hodgkin's disease NOS of lymph nodes inguinal region and leg |
| B61z700 | Hodgkin's disease NOS of spleen                              |
| B61z800 | Hodgkin's disease NOS of lymph nodes of multiple sites       |
| B61zz00 | Hodgkin's disease NOS                                        |
| B62..00 | Other malignant neoplasm of lymphoid and histiocytic tissue  |
| B620.00 | Nodular lymphoma (Brill - Symmers disease)                   |
| B620000 | Nodular lymphoma of unspecified site                         |
| B620100 | Nodular lymphoma of lymph nodes of head, face and neck       |
| B620300 | Nodular lymphoma of intra-abdominal lymph nodes              |
| B620500 | Nodular lymphoma of lymph nodes of inguinal region and leg   |
| B620800 | Nodular lymphoma of lymph nodes of multiple sites            |
| B620z00 | Nodular lymphoma NOS                                         |
| B621.00 | Mycosis fungoides                                            |
| B621000 | Mycosis fungoides of unspecified site                        |

|         |                                                              |
|---------|--------------------------------------------------------------|
| B621300 | Mycosis fungoides of intra-abdominal lymph nodes             |
| B621400 | Mycosis fungoides of lymph nodes of axilla and upper limb    |
| B621500 | Mycosis fungoides of lymph nodes of inguinal region and leg  |
| B621800 | Mycosis fungoides of lymph nodes of multiple sites           |
| B621z00 | Mycosis fungoides NOS                                        |
| B622.00 | Sezary's disease                                             |
| B622z00 | Sezary's disease NOS                                         |
| B623.00 | Malignant histiocytosis                                      |
| B623000 | Malignant histiocytosis of unspecified site                  |
| B623100 | Malignant histiocytosis of lymph nodes head, face and neck   |
| B623300 | Malignant histiocytosis of intra-abdominal lymph nodes       |
| B623z00 | Malignant histiocytosis NOS                                  |
| B624.00 | Leukaemic reticuloendotheliosis                              |
| B624.11 | Leukaemic reticuloendotheliosis                              |
| B624.12 | Hairy cell leukaemia                                         |
| B624000 | Leukaemic reticuloendotheliosis of unspecified sites         |
| B624300 | Leukaemic reticuloend of intra-abdominal lymph nodes         |
| B624z00 | Leukaemic reticuloendotheliosis NOS                          |
| B625.00 | Letterer-Siwe disease                                        |
| B625.11 | Histiocytosis X (acute, progressive)                         |
| B625800 | Letterer-Siwe disease of lymph nodes of multiple sites       |
| B625z00 | Letterer-Siwe disease NOS                                    |
| B626.00 | Malignant mast cell tumours                                  |
| B626500 | Mast cell malignancy of lymph nodes inguinal region and leg  |
| B626800 | Mast cell malignancy of lymph nodes of multiple sites        |
| B626z00 | Malignant mast cell tumour NOS                               |
| B627.00 | Non - Hodgkin's lymphoma                                     |
| B627000 | Follicular non-Hodgkin's small cleaved cell lymphoma         |
| B627100 | Follicular non-Hodg mixed sml cleavd & lge cell lymphoma     |
| B627200 | Follicular non-Hodgkin's large cell lymphoma                 |
| B627300 | Diffuse non-Hodgkin's small cell (diffuse) lymphoma          |
| B627500 | Diffuse non-Hodgkin mixed sml & lge cell (diffuse) lymphoma  |
| B627600 | Diffuse non-Hodgkin's immunoblastic (diffuse) lymphoma       |
| B627700 | Diffuse non-Hodgkin's lymphoblastic (diffuse) lymphoma       |
| B627800 | Diffuse non-Hodgkin's lymphoma undifferentiated (diffuse)    |
| B627900 | Mucosa-associated lymphoma                                   |
| B627911 | Maltoma                                                      |
| B627B00 | Other types of follicular non-Hodgkin's lymphoma             |
| B627C00 | Follicular non-Hodgkin's lymphoma                            |
| B627C11 | Follicular lymphoma NOS                                      |
| B627D00 | Diffuse non-Hodgkin's centroblastic lymphoma                 |
| B627W00 | Unspecified B-cell non-Hodgkin's lymphoma                    |
| B627X00 | Diffuse non-Hodgkin's lymphoma, unspecified                  |
| B62x.00 | Malignant lymphoma otherwise specified                       |
| B62x000 | T-zone lymphoma                                              |
| B62x100 | Lymphoepithelioid lymphoma                                   |
| B62x200 | Peripheral T-cell lymphoma                                   |
| B62x400 | Malignant reticulosis                                        |
| B62x500 | Malignant immunoproliferative small intestinal disease       |
| B62x600 | True histiocytic lymphoma                                    |
| B62xX00 | Oth and unspecif peripheral & cutaneous T-cell lymphomas     |
| B62y.00 | Malignant lymphoma NOS                                       |
| B62y000 | Malignant lymphoma NOS of unspecified site                   |
| B62y100 | Malignant lymphoma NOS of lymph nodes of head, face and neck |
| B62y200 | Malignant lymphoma NOS of intrathoracic lymph nodes          |
| B62y300 | Malignant lymphoma NOS of intra-abdominal lymph nodes        |
| B62y400 | Malignant lymphoma NOS of lymph nodes of axilla and arm      |
| B62y500 | Malignant lymphoma NOS of lymph node inguinal region and leg |
| B62y600 | Malignant lymphoma NOS of intrapelvic lymph nodes            |
| B62y700 | Malignant lymphoma NOS of spleen                             |
| B62y800 | Malignant lymphoma NOS of lymph nodes of multiple sites      |
| B62yz00 | Malignant lymphoma NOS                                       |

|         |                                                              |
|---------|--------------------------------------------------------------|
| B62z.00 | Malignant neoplasms of lymphoid and histiocytic tissue NOS   |
| B62z100 | Unspec malig neop lymphoid/histiocytic lymph node head/neck  |
| B62z200 | Unspec malig neop lymphoid/histiocytic of intrathoracic node |
| B62z500 | Unspec malig neop lymphoid/histiocytic nodes inguinal/leg    |
| B62z800 | Unspec malig neop lymphoid/histiocytic of multiple sites     |
| B62zz00 | Lymphoid and histiocytic malignancy NOS                      |
| B62zz11 | Immunoproliferative neoplasm                                 |
| B63..00 | Multiple myeloma and immunoproliferative neoplasms           |
| B630.00 | Multiple myeloma                                             |
| B630.11 | Kahler's disease                                             |
| B630.12 | Myelomatosis                                                 |
| B630000 | Malignant plasma cell neoplasm, extramedullary plasmacytoma  |
| B630100 | Solitary myeloma                                             |
| B630200 | Plasmacytoma NOS                                             |
| B630300 | Lambda light chain myeloma                                   |
| B631.00 | Plasma cell leukaemia                                        |
| B63y.00 | Other immunoproliferative neoplasms                          |
| B63z.00 | Immunoproliferative neoplasm or myeloma NOS                  |
| B64..00 | Lymphoid leukaemia                                           |
| B64..11 | Lymphatic leukaemia                                          |
| B640.00 | Acute lymphoid leukaemia                                     |
| B641.00 | Chronic lymphoid leukaemia                                   |
| B641.11 | Chronic lymphatic leukaemia                                  |
| B642.00 | Subacute lymphoid leukaemia                                  |
| B64y.00 | Other lymphoid leukaemia                                     |
| B64y100 | Prolymphocytic leukaemia                                     |
| B64y200 | Adult T-cell leukaemia                                       |
| B64yz00 | Other lymphoid leukaemia NOS                                 |
| B64z.00 | Lymphoid leukaemia NOS                                       |
| B65..00 | Myeloid leukaemia                                            |
| B650.00 | Acute myeloid leukaemia                                      |
| B651.00 | Chronic myeloid leukaemia                                    |
| B651.11 | Chronic granulocytic leukaemia                               |
| B651000 | Chronic eosinophilic leukaemia                               |
| B651z00 | Chronic myeloid leukaemia NOS                                |
| B652.00 | Subacute myeloid leukaemia                                   |
| B653.00 | Myeloid sarcoma                                              |
| B653000 | Chloroma                                                     |
| B653100 | Granulocytic sarcoma                                         |
| B65y100 | Acute promyelocytic leukaemia                                |
| B65yz00 | Other myeloid leukaemia NOS                                  |
| B65z.00 | Myeloid leukaemia NOS                                        |
| B66..00 | Monocytic leukaemia                                          |
| B66..12 | Monoblastic leukaemia                                        |
| B660.00 | Acute monocytic leukaemia                                    |
| B661.00 | Chronic monocytic leukaemia                                  |
| B66y.00 | Other monocytic leukaemia                                    |
| B66z.00 | Monocytic leukaemia NOS                                      |
| B67..00 | Other specified leukaemia                                    |
| B670.00 | Acute erythraemia and erythroleukaemia                       |
| B670.11 | Di Guglielmo's disease                                       |
| B671.00 | Chronic erythraemia                                          |
| B671.11 | Heilmeyer - Schoner disease                                  |
| B672.00 | Megakaryocytic leukaemia                                     |
| B672.11 | Thrombocytic leukaemia                                       |
| B673.00 | Mast cell leukaemia                                          |
| B674.00 | Acute panmyelosis                                            |
| B675.00 | Acute myelofibrosis                                          |
| B67y.00 | Other and unspecified leukaemia                              |
| B67y000 | Lymphosarcoma cell leukaemia                                 |
| B67yz00 | Other and unspecified leukaemia NOS                          |
| B67z.00 | Other specified leukaemia NOS                                |

|         |                                                              |
|---------|--------------------------------------------------------------|
| B68..00 | Leukaemia of unspecified cell type                           |
| B680.00 | Acute leukaemia NOS                                          |
| B681.00 | Chronic leukaemia NOS                                        |
| B682.00 | Subacute leukaemia NOS                                       |
| B68y.00 | Other leukaemia of unspecified cell type                     |
| B68z.00 | Leukaemia NOS                                                |
| B69..00 | Myelomonocytic leukaemia                                     |
| B690.00 | Acute myelomonocytic leukaemia                               |
| B691.00 | Chronic myelomonocytic leukaemia                             |
| B6y..00 | Malignant neoplasm lymphatic or haematopoietic tissue OS     |
| B6z..00 | Malignant neoplasm lymphatic or haematopoietic tissue NOS    |
| B6z0.00 | Kaposi's sarcoma of lymph nodes                              |
| BA02.00 | Neoplasm of unspecified nature of bone, skin and soft tissue |
| BA02z00 | Neoplasm of unspec nature of bone, skin or soft tissue NOS   |
| BA07.00 | Neop unspec nature of endocrine glands, other nervous system |
| BB...00 | [M]Morphology of neoplasms                                   |
| BB...11 | [M]Tumour morphology                                         |
| BB0..00 | [M]Neoplasms NOS                                             |
| BB02.00 | [M]Neoplasm, malignant                                       |
| BB03.00 | [M]Neoplasm, metastatic                                      |
| BB03.11 | [M]Secondary neoplasm                                        |
| BB04.00 | [M]Neoplasm, malig, uncertain whether primary or metastatic  |
| BB07.00 | [M]Tumour cells, malignant                                   |
| BB08.00 | [M]Malignant tumour, small cell type                         |
| BB09.00 | [M]Malignant tumour, giant cell type                         |
| BB0A.00 | [M]Malignant tumour, fusiform cell type                      |
| BB0z.00 | [M]Unspecified tumour cell NOS                               |
| BB1..00 | [M]Epithelial neoplasms NOS                                  |
| BB12.00 | [M]Carcinoma NOS                                             |
| BB13.00 | [M]Carcinoma, metastatic, NOS                                |
| BB13.11 | [M]Secondary carcinoma                                       |
| BB14.00 | [M]Carcinomatosis                                            |
| BB16.00 | [M]Epithelioma, malignant                                    |
| BB17.00 | [M]Large cell carcinoma NOS                                  |
| BB18.00 | [M]Carcinoma, undifferentiated type, NOS                     |
| BB19.00 | [M]Carcinoma, anaplastic type, NOS                           |
| BB1A.00 | [M]Pleomorphic carcinoma                                     |
| BB1B.00 | [M]Giant cell and spindle cell carcinoma                     |
| BB1C.00 | [M]Giant cell carcinoma                                      |
| BB1D.00 | [M]Spindle cell carcinoma                                    |
| BB1E.00 | [M]Pseudosarcomatous carcinoma                               |
| BB1F.00 | [M]Polygonal cell carcinoma                                  |
| BB1G.00 | [M]Spheroidal cell carcinoma                                 |
| BB1H.00 | [M]Tumourlet                                                 |
| BB1J.00 | [M]Small cell carcinoma NOS                                  |
| BB1J.12 | [M]Round cell carcinoma                                      |
| BB1K.00 | [M]Oat cell carcinoma                                        |
| BB1L.00 | [M]Small cell carcinoma, fusiform cell type                  |
| BB1M.00 | [M]Small cell carcinoma, intermediate cell                   |
| BB1N.00 | [M]Small cell-large cell carcinoma                           |
| BB1z.00 | [M]Unspecified epithelial neoplasm                           |
| BB2..00 | [M]Papillary and squamous cell neoplasms                     |
| BB2..11 | [M]Papillary neoplasms                                       |
| BB2..12 | [M]Squamous cell neoplasms                                   |
| BB22.00 | [M]Papillary carcinoma NOS                                   |
| BB24.00 | [M]Verrucous carcinoma NOS                                   |
| BB24.11 | [M]Verrucous epidermoid carcinoma                            |
| BB24.12 | [M]Verrucous squamous cell carcinoma                         |
| BB26.00 | [M]Papillary squamous cell carcinoma                         |
| BB26.11 | [M]Papillary epidermoid carcinoma                            |
| BB29.12 | [M]Intraepidermal carcinoma NOS                              |
| BB29.13 | [M]Intraepithelial squamous cell carcinoma                   |

BB2A.00 [M]Squamous cell carcinoma NOS  
 BB2A.11 [M]Epidermoid carcinoma NOS  
 BB2A.12 [M]Spinous cell carcinoma  
 BB2A.13 [M]Squamous cell carcinoma of skin NOS  
 BB2B.00 [M]Squamous cell carcinoma, metastatic NOS  
 BB2C.00 [M]Squamous cell carcinoma, keratinising type NOS  
 BB2C.11 [M]Epidermoid carcinoma, keratinising type  
 BB2D.00 [M]Squamous cell carcinoma, large cell, non-keratinising  
 BB2E.00 [M]Squamous cell carcinoma, small cell, non-keratinising  
 BB2F.00 [M]Squamous cell carcinoma, spindle cell type  
 BB2G.00 [M]Adenoid squamous cell carcinoma  
 BB2J.00 [M]Squamous cell carcinoma, microinvasive  
 BB2M.00 [M]Lymphoepithelial carcinoma  
 BB2N.00 [M]Intraepit neop,grade III,of cervix, vulva and vagina  
 BB2z.00 [M]Papillary or squamous cell neoplasm NOS  
 BB3..00 [M]Basal cell neoplasms  
 BB30.00 [M]Basal cell tumour  
 BB31.00 [M]Basal cell carcinoma NOS  
 BB32.00 [M]Multicentric basal cell carcinoma  
 BB33.00 [M]Basal cell carcinoma, morphoea type  
 BB34.00 [M]Basal cell carcinoma, fibroepithelial type  
 BB35.00 [M]Basosquamous carcinoma  
 BB36.00 [M]Metatypical carcinoma  
 BB3z.00 [M]Basal cell neoplasm NOS  
 BB4..00 [M]Transitional cell papillomas and carcinomas  
 BB41.00 [M]Urothelial papilloma  
 BB41.11 [M]Urinary bladder papilloma  
 BB43.00 [M]Transitional cell carcinoma NOS  
 BB43.11 [M]Urothelial carcinoma  
 BB45.00 [M]Transitional cell papilloma, inverted type  
 BB47.00 [M]Transitional cell carcinoma, spindle cell type  
 BB48.00 [M]Basaloid carcinoma  
 BB49.00 [M]Cloacogenic carcinoma  
 BB4A.00 [M]Papillary transitional cell carcinoma  
 BB4z.00 [M]Transitional cell papilloma or carcinoma NOS  
 BB5..00 [M]Adenomas and adenocarcinomas  
 BB5..11 [M]Adenocarcinomas  
 BB52.00 [M]Adenocarcinoma NOS  
 BB52000 [M]Adenocarcinoma in tubulovillous adenoma  
 BB53.00 [M]Adenocarcinoma, metastatic, NOS  
 BB54.00 [M]Scirrhou adenocarcinoma  
 BB55.00 [M]Linitis plastica  
 BB56.00 [M]Superficial spreading adenocarcinoma  
 BB57.00 [M]Adenocarcinoma, intestinal type  
 BB58.00 [M]Carcinoma, diffuse type  
 BB5a.00 [M]Renal adenoma and carcinoma  
 BB5a000 [M]Renal cell carcinoma  
 BB5a011 [M]Grawitz tumour  
 BB5a012 [M]Hypernephroma  
 BB5az00 [M]Renal adenoma or carcinoma NOS  
 BB5b.00 [M]Granular cell carcinoma  
 BB5B.00 [M]Pancreatic adenomas and carcinomas  
 BB5B100 [M]Islet cell carcinoma  
 BB5B300 [M]Insulinoma, malignant  
 BB5B500 [M]Glucagonoma, malignant  
 BB5Bz00 [M]Pancreatic adenoma or carcinoma NOS  
 BB5c.00 [M]Parathyroid adenomas and adenocarcinomas  
 BB5C.00 [M]Gastrinoma and carcinomas  
 BB5C000 [M]Gastrinoma NOS  
 BB5C011 [M]G cell tumour NOS  
 BB5C100 [M]Gastrinoma, malignant  
 BB5cz00 [M]Parathyroid adenoma or adenocarcinoma NOS

|         |                                                        |
|---------|--------------------------------------------------------|
| BB5Cz00 | [M]Gastrinoma or carcinoma NOS                         |
| BB5D.00 | [M]Hepatobiliary tract adenomas and carcinomas         |
| BB5D.11 | [M]Biliary tract adenomas and adenocarcinomas          |
| BB5D100 | [M]Cholangiocarcinoma                                  |
| BB5D111 | [M]Bile duct carcinoma                                 |
| BB5D300 | [M]Bile duct cystadenocarcinoma                        |
| BB5D500 | [M]Hepatocellular carcinoma NOS                        |
| BB5D511 | [M]Hepatoma NOS                                        |
| BB5D512 | [M]Hepatoma, malignant                                 |
| BB5D513 | [M]Liver cell carcinoma                                |
| BB5D800 | [M]Hepatocellular carcinoma, fibrolamellar             |
| BB5Dz00 | [M]Hepatobiliary adenoma or carcinoma NOS              |
| BB5f.00 | [M]Thyroid adenoma and adenocarcinoma                  |
| BB5f100 | [M]Follicular adenocarcinoma NOS                       |
| BB5f111 | [M]Follicular carcinoma                                |
| BB5f200 | [M]Follicular adenocarcinoma, well differentiated type |
| BB5f300 | [M]Follicular adenocarcinoma, trabecular type          |
| BB5f600 | [M]Papillary and follicular adenocarcinoma             |
| BB5f700 | [M]Nonencapsulated sclerosing carcinoma                |
| BB5fz00 | [M]Thyroid adenoma or adenocarcinoma NOS               |
| BB5g.00 | [M]Multiple endocrine adenomas                         |
| BB5h.00 | [M]Adrenal cortical tumours                            |
| BB5h100 | [M]Adrenal cortical carcinoma                          |
| BB5j.00 | [M]Endometrioid adenomas and carcinomas                |
| BB5J.00 | [M]Adenoid cystic carcinoma                            |
| BB5J.11 | [M]Cylindroid adenocarcinoma                           |
| BB5J.12 | [M]Cylindroid bronchial adenoma                        |
| BB5J.13 | [M]Cylindroma NOS                                      |
| BB5j100 | [M]Endometrioid adenoma, borderline malignancy         |
| BB5j200 | [M]Endometrioid carcinoma                              |
| BB5jz00 | [M]Endometrioid adenoma or carcinoma NOS               |
| BB5K.00 | [M]Cribriform carcinoma                                |
| BB5M.00 | [M]Tubular adenomas and adenocarcinomas                |
| BB5M100 | [M]Tubular adenocarcinoma                              |
| BB5Mz00 | [M]Tubular adenoma or adenocarcinoma NOS               |
| BB5N100 | [M]Adenocarcinoma in adenomatous polypoid coli         |
| BB5P.00 | [M]Solid carcinoma NOS                                 |
| BB5R.00 | [M]Carcinoid tumours                                   |
| BB5R000 | [M]Carcinoid tumour NOS                                |
| BB5R100 | [M]Carcinoid tumour, malignant                         |
| BB5R111 | [M]Carcinoid bronchial adenoma                         |
| BB5R200 | [M]Carcinoid tumour, argentaffin, NOS                  |
| BB5R600 | [M]Mucocarcinoid tumour, malignant                     |
| BB5R611 | [M]Goblet cell tumour                                  |
| BB5R800 | [M]Adenocarcinoid tumour                               |
| BB5R900 | [M]Neuroendocrine carcinoma                            |
| BB5RA00 | [M]Merkel cell carcinoma                               |
| BB5Rz00 | [M]Carcinoid tumours NOS                               |
| BB5S.00 | [M]Respiratory tract adenomas and adenocarcinomas      |
| BB5S000 | [M]Pulmonary adenomatosis                              |
| BB5S100 | [M]Bronchial adenoma NOS                               |
| BB5S200 | [M]Bronchiolo-alveolar adenocarcinoma                  |
| BB5S211 | [M]Alveolar cell carcinoma                             |
| BB5S212 | [M]Bronchiolar carcinoma                               |
| BB5S400 | [M]Alveolar adenocarcinoma                             |
| BB5Sz00 | [M]Respiratory tract adenoma or adenocarcinoma NOS     |
| BB5T.00 | [M]Papillary adenomas and adenocarcinomas              |
| BB5T100 | [M]Papillary adenocarcinoma NOS                        |
| BB5Tz00 | [M]Papillary adenoma or adenocarcinoma NOS             |
| BB5U.00 | [M]Villous adenomas and adenocarcinomas                |
| BB5U000 | [M]Villous adenoma NOS                                 |
| BB5U011 | [M]Villous papilloma                                   |



|         |                                                    |
|---------|----------------------------------------------------|
| BB5U100 | [M]Adenocarcinoma in villous adenoma               |
| BB5U200 | [M]Villous adenocarcinoma                          |
| BB5Uz00 | [M]Villous adenoma or adenocarcinoma NOS           |
| BB5V.00 | [M]Pituitary adenomas and carcinomas               |
| BB5V100 | [M]Chromophobe carcinoma                           |
| BB5V311 | [M]Eosinophil carcinoma                            |
| BB5V700 | [M]Basophil carcinoma                              |
| BB5V711 | [M]Mucoid cell carcinoma                           |
| BB5Vz00 | [M]Pituitary adenoma or carcinoma NOS              |
| BB5W.00 | [M]Oxyphilic adenomas and adenocarcinomas          |
| BB5W013 | [M]Oncocytoma                                      |
| BB5W100 | [M]Oxyphilic adenocarcinoma                        |
| BB5W111 | [M]Hurthle cell adenocarcinoma                     |
| BB5W112 | [M]Oncytic adenocarcinoma                          |
| BB5Wz00 | [M]Oxyphilic adenoma or adenocarcinoma NOS         |
| BB5X.00 | [M]Clear cell adenomas and adenocarcinomas         |
| BB5X100 | [M]Clear cell adenocarcinoma NOS                   |
| BB5Xz00 | [M]Clear cell adenoma or adenocarcinoma NOS        |
| BB5y.00 | [M]Adenoma and adenocarcinomas OS                  |
| BB5Y.00 | [M]Hypernephroid tumour                            |
| BB5y000 | [M]Basal cell adenocarcinoma                       |
| BB5y200 | [M]Klatskin's tumour                               |
| BB5y300 | [M]Apudoma                                         |
| BB5z.00 | [M]Adenoma or adenocarcinoma NOS                   |
| BB6..00 | [M]Adnexal and skin appendage neoplasms            |
| BB60.00 | [M]Skin appendage adenoma and carcinoma            |
| BB60100 | [M]Skin appendage carcinoma                        |
| BB61.00 | [M]Sweat gland adenoma and adenocarcinomas         |
| BB61100 | [M]Sweat gland tumour NOS                          |
| BB61200 | [M]Sweat gland adenocarcinoma                      |
| BB62.00 | [M]Apocrine adenoma and adenocarcinomas            |
| BB62100 | [M]Apocrine adenocarcinoma                         |
| BB63.12 | [M]Eccrine poroma                                  |
| BB69.00 | [M]Sebaceous adenoma and adenocarcinoma            |
| BB69100 | [M]Sebaceous adenocarcinoma                        |
| BB69z00 | [M]Sebaceous adenoma or adenocarcinoma NOS         |
| BB6A.00 | [M]Ceruminous adenoma and adenocarcinoma           |
| BB6z.00 | [M]Adnexal and skin appendage neoplasm NOS         |
| BB7..00 | [M]Mucoepidermoid neoplasms                        |
| BB70.00 | [M]Mucoepidermoid tumour                           |
| BB71.00 | [M]Mucoepidermoid carcinoma                        |
| BB7z.00 | [M]Mucoepidermoid neoplasm NOS                     |
| BB8..00 | [M]Cystic, mucinous and serous neoplasms           |
| BB80.00 | [M]Cystadenoma and carcinoma                       |
| BB80100 | [M]Cystadenocarcinoma NOS                          |
| BB80z00 | [M]Cystadenoma or carcinoma NOS                    |
| BB81.00 | [M]Ovarian cystic, mucinous and serous neoplasms   |
| BB81.11 | [M]Ovarian cystadenoma or carcinoma                |
| BB81.12 | [M]Ovarian mucinous tumour                         |
| BB81.13 | [M]Ovarian papillary tumour                        |
| BB81.14 | [M]Ovarian serous tumour                           |
| BB81100 | [M]Serous cystadenoma, borderline malignancy       |
| BB81200 | [M]Serous cystadenocarcinoma, NOS                  |
| BB81500 | [M]Papillary cystadenocarcinoma, NOS               |
| BB81800 | [M]Papillary serous cystadenocarcinoma             |
| BB81A00 | [M]Serous surface papilloma, borderline malignancy |
| BB81B00 | [M]Serous surface papillary carcinoma              |
| BB81D00 | [M]Mucinous cystadenoma, borderline malignancy     |
| BB81E00 | [M]Mucinous cystadenocarcinoma NOS                 |
| BB81E11 | [M]Pseudomucinous adenocarcinoma                   |
| BB81H00 | [M]Papillary mucinous cystadenocarcinoma           |
| BB81J00 | [M]Serous cystadenoma, borderline malignancy       |

|         |                                                             |
|---------|-------------------------------------------------------------|
| BB81K00 | [M]Papillary cystadenoma, borderline malignancy             |
| BB81L00 | [M]Papillary cystic tumour                                  |
| BB81M00 | [M]Papillary serous cystadenoma, borderline malignancy      |
| BB81z00 | [M]Ovarian cystic, mucinous or serous neoplasm NOS          |
| BB82.00 | [M]Mucinous adenoma and adenocarcinoma                      |
| BB82100 | [M]Mucinous adenocarcinoma                                  |
| BB82111 | [M]Colloid adenocarcinoma                                   |
| BB82112 | [M]Gelatinous adenocarcinoma                                |
| BB82114 | [M]Mucous adenocarcinoma                                    |
| BB83.00 | [M]Pseudomyxoma peritonei                                   |
| BB84.00 | [M]Mucin-producing adenocarcinoma                           |
| BB85.00 | [M]Signet ring carcinoma                                    |
| BB85000 | [M]Signet ring cell carcinoma                               |
| BB85100 | [M]Metastatic signet ring cell carcinoma                    |
| BB85111 | [M]Krukenberg tumour                                        |
| BB85z00 | [M]Signet ring carcinoma NOS                                |
| BB8z.00 | [M]Cystic, mucinous or serous neoplasm NOS                  |
| BB9..00 | [M]Ductal, lobular and medullary neoplasms                  |
| BB90.00 | [M]Intraductal carcinoma, noninfiltrating NOS               |
| BB91.00 | [M]Infiltrating duct carcinoma                              |
| BB91.11 | [M]Duct carcinoma NOS                                       |
| BB91000 | [M]Intraductal papillary adenocarcinoma with invasion       |
| BB91100 | [M]Infiltrating duct and lobular carcinoma                  |
| BB92.00 | [M]Comedocarcinoma, noninfiltrating                         |
| BB93.00 | [M]Comedocarcinoma NOS                                      |
| BB94.00 | [M]Juvenile breast carcinoma                                |
| BB94.11 | [M]Secretory breast carcinoma                               |
| BB9B.00 | [M]Medullary carcinoma NOS                                  |
| BB9B.11 | [M]C cell carcinoma                                         |
| BB9C.00 | [M]Medullary carcinoma with amyloid stroma                  |
| BB9F.00 | [M]Lobular carcinoma NOS                                    |
| BB9G.00 | [M]Infiltrating ductular carcinoma                          |
| BB9H.00 | [M]Inflammatory carcinoma                                   |
| BB9J.00 | [M]Paget's disease, mammary                                 |
| BB9J.11 | [M]Paget's disease, breast                                  |
| BB9K.00 | [M]Paget's disease and infiltrating breast duct carcinoma   |
| BB9K000 | [M]Paget's disease and intraductal carcinoma of breast      |
| BB9L.00 | [M]Paget's disease, extramammary, exc Paget's disease bone  |
| BB9M.00 | [M]Intracystic carcinoma NOS                                |
| BB9z.00 | [M]Ductal, lobular or medullary neoplasm NOS                |
| BBa..00 | [M]Miscellaneous tumours                                    |
| BBA..00 | [M]Acinar cell neoplasms                                    |
| BBa0.00 | [M]Craniopharyngioma                                        |
| BBa1.00 | [M]Pinealoma                                                |
| BBA1.00 | [M]Acinar cell tumour                                       |
| BBA2.00 | [M]Acinar cell carcinoma                                    |
| BBa3.00 | [M]Pineoblastoma                                            |
| BBa4.12 | [M]Melanotic progonoma                                      |
| BBaz.00 | [M]Miscellaneous tumour NOS                                 |
| BBAz.00 | [M]Acinar cell neoplasm NOS                                 |
| BBb..00 | [M]Gliomas                                                  |
| BBB..00 | [M]Complex epithelial neoplasms                             |
| BBb0.00 | [M]Glioma, malignant                                        |
| BBB0.00 | [M]Adenosquamous carcinoma                                  |
| BBb0.11 | [M]Glioma NOS                                               |
| BBb0.12 | [M]Gliosarcoma                                              |
| BBb1.00 | [M]Gliomatosis cerebri                                      |
| BBb2.00 | [M]Mixed glioma                                             |
| BBB2.00 | [M]Adenocarcinoma with squamous metaplasia                  |
| BBb2.11 | [M]Mixed glioma                                             |
| BBb3.00 | [M]Subependymal glioma                                      |
| BBB3.00 | [M]Adenocarcinoma with cartilaginous and osseous metaplasia |

|         |                                                |
|---------|------------------------------------------------|
| BBb3.11 | [M]Subependymal astrocytoma NOS                |
| BBb3.12 | [M]Subependymal astrocytoma NOS                |
| BBb4.00 | [M]Subependymal giant cell astrocytoma         |
| BBB4.00 | [M]Adenocarcinoma with spindle cell metaplasia |
| BBB5.00 | [M]Adenocarcinoma with apocrine metaplasia     |
| BBB6100 | [M]Thymoma, malignant                          |
| BBB6z00 | [M]Thymoma NOS                                 |
| BBb7.00 | [M]Ependymoma NOS                              |
| BBB7.00 | [M]Epithelial-myoepithelial carcinoma          |
| BBb8.00 | [M]Ependymoma, anaplastic type                 |
| BBb8.11 | [M]Ependymoblastoma                            |
| BBba.00 | [M]Primitive neuroectodermal tumour            |
| BBbA.00 | [M]Myxopapillary ependymoma                    |
| BBbB.00 | [M]Astrocytoma NOS                             |
| BBbB.11 | [M]Astrocytic glioma                           |
| BBbC.00 | [M]Astrocytoma, anaplastic type                |
| BBbE.00 | [M]Gemistocytic astrocytoma                    |
| BBbF.00 | [M]Fibrillary astrocytoma                      |
| BBbG.00 | [M]Pilocytic astrocytoma                       |
| BBbG.11 | [M]Juvenile astrocytoma                        |
| BBbK.00 | [M]Astroblastoma                               |
| BBbL.00 | [M]Glioblastoma NOS                            |
| BBbL.11 | [M]Glioblastoma multiforme                     |
| BBbM.00 | [M]Giant cell glioblastoma                     |
| BBbQ.00 | [M]Oligodendroglioma NOS                       |
| BBbR.00 | [M]Oligodendroglioma, anaplastic type          |
| BBbS.00 | [M]Oligodendroblastoma                         |
| BBbT.00 | [M]Medulloblastoma NOS                         |
| BBbU.00 | [M]Desmoplastic medulloblastoma                |
| BBbV.00 | [M]Medullomyoblastoma                          |
| BBbW.00 | [M]Cerebellar sarcoma NOS                      |
| BBbz.00 | [M]Glioma NOS                                  |
| BBbZ.00 | [M]Pleomorphic xanthoastrocytoma               |
| BBc..00 | [M]Neuroepitheliomatous neoplasms              |
| BBC..00 | [M]Specialised gonadal neoplasms               |
| BBc0.00 | [M]Ganglioneuromatous neoplasms                |
| BBC0.00 | [M]Sex cord-stromal tumour                     |
| BBC0.11 | [M]Gonadal stromal tumour                      |
| BBC0.12 | [M]Ovarian stromal tumour                      |
| BBC0.13 | [M]Testicular stromal tumour                   |
| BBC0000 | [M]Sex cord tumour with annular tubules        |
| BBc0100 | [M]Ganglioneuroblastoma                        |
| BBc1.00 | [M]Neuroblastoma NOS                           |
| BBC1.00 | [M]Thecal cell neoplasms                       |
| BBC1000 | [M]Thecoma NOS                                 |
| BBC1200 | [M]Thecoma, luteinized                         |
| BBc2.00 | [M]Medulloepithelioma NOS                      |
| BBC3.00 | [M]Granulosa cell tumour NOS                   |
| BBC3000 | [M]Juvenile granulosa cell tumour              |
| BBC4.00 | [M]Granulosa cell tumour, malignant            |
| BBC5.00 | [M]Granulosa cell-theca cell tumour            |
| BBc6.00 | [M]Ganglioglioma                               |
| BBC6.00 | [M]Androblastoma                               |
| BBc6.11 | [M]Glioneuroma                                 |
| BBC6z11 | [M]Arrhenoblastoma NOS                         |
| BBc7.00 | [M]Neurocytoma                                 |
| BBc9.00 | [M]Retinoblastomas                             |
| BBc9z00 | [M]Retinoblastoma NOS                          |
| BBcA.00 | [M]Olfactory neurogenic tumour                 |
| BBcA.00 | [M]Sertoli cell carcinoma                      |
| BBcC.00 | [M]Aesthesioneuroblastoma                      |
| BBCC.00 | [M]Leydig cell tumour                          |

|         |                                                         |
|---------|---------------------------------------------------------|
| BBcC.11 | [M]Olfactory neuroblastoma                              |
| BBCC100 | [M]Leydig cell tumour, malignant                        |
| BBCCz00 | [M]Leydig cell tumour NOS                               |
| BBd..00 | [M]Meningiomas                                          |
| BBD..00 | [M]Paragangliomas and glomus tumours                    |
| BBD0.00 | [M]Paraganglioma NOS                                    |
| BBD1.00 | [M]Paraganglioma, malignant                             |
| BBd1.11 | [M]Diffuse meningiomatosis                              |
| BBd1.12 | [M]Multiple meningiomatosis                             |
| BBd2.00 | [M]Meningioma, malignant                                |
| BBd2.11 | [M]Leptomeningeal sarcoma                               |
| BBd2.12 | [M]Meningothelial sarcoma                               |
| BBD4.00 | [M]Glomus jugulare tumour                               |
| BBD4.11 | [M]Jugular paraganglioma                                |
| BBD5.00 | [M]Aortic body tumour                                   |
| BBD6.00 | [M]Carotid body tumour                                  |
| BBD7.00 | [M]Extra-adrenal paraganglioma, NOS                     |
| BBD7.11 | [M]Chemodectoma                                         |
| BBdA.00 | [M]Papillary meningioma                                 |
| BBDA.00 | [M]Pheochromocytoma, malignant                          |
| BBDB.00 | [M]Glomangiosarcoma                                     |
| BBDD.00 | [M]Glomangioma                                          |
| BBDF.00 | [M]Glomangiomyoma                                       |
| BBe..00 | [M]Nerve sheath tumour                                  |
| BBE..00 | [M]Naevi and melanomas                                  |
| BBe1.00 | [M]Neurofibromatosis NOS                                |
| BBE1.00 | [M]Malignant melanoma NOS                               |
| BBe1.11 | [M]Multiple neurofibromatosis                           |
| BBE1.11 | [M]Melanocarcinoma                                      |
| BBe1.12 | [M]Von Recklinghausen's disease                         |
| BBE1.12 | [M]Melanoma NOS                                         |
| BBE1.13 | [M]Melanosarcoma NOS                                    |
| BBE1000 | [M]Malignant melanoma, regressing                       |
| BBE1100 | [M]Desmoplastic melanoma, malignant                     |
| BBe2.00 | [M]Neurofibrosarcoma                                    |
| BBE2.00 | [M]Nodular melanoma                                     |
| BBE4.00 | [M]Balloon cell melanoma                                |
| BBe6.00 | [M]Neurinomatosis                                       |
| BBe7.00 | [M]Neurilemmoma, malignant                              |
| BBe7.11 | [M]Schwannoma, malignant                                |
| BBE8.11 | [M]Melanocytoma of eyeball                              |
| BBe9.00 | [M]Triton tumour, malignant                             |
| BBeA.00 | [M]Neurothekeoma                                        |
| BBEA.00 | [M]Amelanotic melanoma                                  |
| BBED.00 | [M]Precancerous melanosis NOS                           |
| BBEF.11 | [M]Lentigo maligna                                      |
| BBEG.00 | [M]Malignant melanoma in Hutchinson's melanotic freckle |
| BBEG.11 | [M]Lentigo maligna melanoma                             |
| BBEG000 | [M]Acral lentiginous melanoma, malignant                |
| BBEH.00 | [M]Superficial spreading melanoma                       |
| BBEP.00 | [M]Epithelioid cell melanoma                            |
| BBEQ.00 | [M]Spindle cell melanoma NOS                            |
| BBES.00 | [M]Spindle cell melanoma, type B                        |
| BBET.00 | [M]Mixed epithelioid and spindle melanoma               |
| BBEz.00 | [M]Naevi or melanoma NOS                                |
| BBf..00 | [M]Granular cell tumours and alveolar soft part sarcoma |
| BBF..00 | [M]Soft tissue tumours and sarcomas NOS                 |
| BBF1.00 | [M]Sarcoma NOS                                          |
| BBf2.00 | [M]Alveolar soft part sarcoma                           |
| BBF2.00 | [M]Sarcomatosis NOS                                     |
| BBF3.00 | [M]Spindle cell sarcoma                                 |
| BBF4.00 | [M]Giant cell sarcoma (except of bone)                  |

BBF4.11 [M]Pleomorphic cell sarcoma  
 BBF5.00 [M]Small cell sarcoma  
 BBF5.11 [M]Round cell sarcoma  
 BBF6.00 [M]Epithelioid cell sarcoma  
 BBFz.00 [M]Soft tissue tumour or sarcoma NOS  
 BBg..00 [M]Lymphomas, NOS or diffuse  
 BBG..00 [M]Fibromatous neoplasms  
 BBg1.00 [M]Malignant lymphoma NOS  
 BBG1.00 [M]Fibrosarcoma NOS  
 BBg1.11 [M]Lymphoma NOS  
 BBg1000 [M]Malignant lymphoma, diffuse NOS  
 BBg2.00 [M]Malignant lymphoma, non Hodgkin's type  
 BBg2.11 [M]Non Hodgkins lymphoma  
 BBg3.00 [M]Malignant lymphoma, undifferentiated cell type NOS  
 BBG3.00 [M]Fibromyxosarcoma  
 BBg4.00 [M]Malignant lymphoma, stem cell type  
 BBg5.00 [M]Malignant lymphoma, convoluted cell type NOS  
 BBg7.00 [M]Malignant lymphoma, lymphoplasmacytoid type  
 BBg8.00 [M]Malignant lymphoma, immunoblastic type  
 BBG8.00 [M]Infantile fibrosarcoma  
 BBG8.11 [M]Congenital fibrosarcoma  
 BBgA.00 [M]Malignant lymphoma, centroblastic-centrocytic, diffuse  
 BBGA.00 [M]Aggressive fibromatosis  
 BBGA.12 [M]Extra-abdominal desmoid  
 BBGA.13 [M]Invasive fibroma  
 BBgB.00 [M]Malignant lymphoma, follicular centre cell NOS  
 BBGB.00 [M]Abdominal fibromatosis  
 BBgC.00 [M]Malignant lymphoma, lymphocytic, well differentiated NOS  
 BBGC.00 [M]Desmoplastic fibroma  
 BBgC.11 [M]Lymphocytic lymphoma NOS  
 BBgC.12 [M]Lymphocytic lymphosarcoma NOS  
 BBgD.00 [M]Malig lymphoma, lymphocytic, intermediate different NOS  
 BBgE.00 [M]Malignant lymphoma, centrocytic  
 BBGE.00 [M]Atypical fibrous histiocytoma  
 BBGF.00 [M]Fibrous histiocytoma, malignant  
 BBgG.00 [M]Malignant lymphoma, lymphocytic, poorly different NOS  
 BBGG.00 [M]Fibroxsanthoma NOS  
 BBgG.11 [M]Lymphoblastic lymphosarcoma NOS  
 BBgG.12 [M]Lymphoblastic lymphoma NOS  
 BBgG.13 [M]Lymphoblastoma NOS  
 BBgH.00 [M]Prolymphocytic lymphosarcoma  
 BBGH.00 [M]Atypical fibroxanthoma  
 BBgJ.00 [M]Malignant lymphoma, centroblastic type NOS  
 BBGJ.00 [M]Fibroxsanthoma, malignant  
 BBGJ.11 [M]Fibroxsanthosarcoma  
 BBgK.00 [M]Malig lymphoma, follicular centre cell, non-cleaved NOS  
 BBGK.14 [M]Subepidermal nodular fibrosis  
 BBgL.00 [M]Malignant lymphoma, small lymphocytic NOS  
 BBgM.00 [M]Malignant lymphoma, small cleaved cell, diffuse  
 BBGM.00 [M]Dermatofibrosarcoma NOS  
 BBgN.00 [M]Malign lymphoma,lymphocytic,intermediate differrn, diffuse  
 BBGN.00 [M]Myofibromatosis  
 BBgP.00 [M]Malignant lymphoma, mixed small and large cell, diffuse  
 BBGP.00 [M]Pigmented dermatofibrosarcoma protuberans  
 BBgR.00 [M]Malignant lymphoma, large cell, diffuse NOS  
 BBgS.00 [M]Malignant lymphoma, large cell, cleaved, diffuse  
 BBgT.00 [M]Malignant lymphoma, large cell, noncleaved, diffuse  
 BBgV.00 [M]Malignant lymphoma, small cell, noncleaved, diffuse  
 BBgz.00 [M]Lymphoma, diffuse or NOS  
 BBGz.00 [M]Fibromatous neoplasm NOS  
 BBH..00 [M]Myxomatous neoplasms  
 BBh0.00 [M]Reticulosarcoma NOS

|         |                                                             |
|---------|-------------------------------------------------------------|
| BBh0.11 | [M]Reticulum cell sarcoma NOS                               |
| BBH1.00 | [M]Myxosarcoma                                              |
| BBHz.00 | [M]Myxomatous neoplasm NOS                                  |
| BBHZ.00 | [M]Angiomyxoma                                              |
| BBj..00 | [M]Hodgkin's disease                                        |
| BBj0.00 | [M]Hodgkin's disease NOS                                    |
| BBj1.00 | [M]Hodgkin's disease, lymphocytic predominance              |
| BBJ1.00 | [M]Liposarcoma NOS                                          |
| BBj1000 | [M]Hodgkin,s disease, lymphocytic predominance, diffuse     |
| BBj1100 | [M]Hodgkin,s disease, lymphocytic predominance, nodular     |
| BBj2.00 | [M]Hodgkin's disease, mixed cellularity                     |
| BBJ3.00 | [M]Liposarcoma, well differentiated type                    |
| BBj4.00 | [M]Hodgkin's disease,lymphocytic depletion,diffuse fibrosis |
| BBJ5.00 | [M]Myxoid liposarcoma                                       |
| BBJ5.12 | [M]Myxoliposarcoma                                          |
| BBj6.00 | [M]Hodgkin's disease, nodular sclerosis NOS                 |
| BBj6000 | [M]Hodgkin,s disease, nodular sclerosis, lymphocytic predom |
| BBj6100 | [M]Hodgkin,s disease, nodular sclerosis, mixed cellularity  |
| BBj6200 | [M]Hodgkin,s disease, nodular sclerosis, lymphocytic deplet |
| BBJ7.00 | [M]Pleomorphic liposarcoma                                  |
| BBJ8.00 | [M]Mixed type liposarcoma                                   |
| BBj9.00 | [M]Hodgkin's granuloma                                      |
| BBJB.00 | [M]Angiolipomatous neoplasms                                |
| BBJBz00 | [M]Angiolipomatous neoplasm NOS                             |
| BBJD.00 | [M]Hibernoma                                                |
| BBJH.00 | [M]Dedifferentiated liposarcoma                             |
| BBk..00 | [M]Lymphomas, nodular or follicular                         |
| BBK..00 | [M]Myomatous neoplasms                                      |
| BBk0.00 | [M]Malignant lymphoma, nodular NOS                          |
| BBk0.11 | [M]Brill - Symmers' disease                                 |
| BBk0.12 | [M]Follicular lymphosarcoma NOS                             |
| BBk0.13 | [M]Giant follicular lymphoma                                |
| BBK0200 | [M]Leiomyosarcoma NOS                                       |
| BBK0300 | [M]Epithelioid leiomyoma                                    |
| BBK0400 | [M]Epithelioid leiomyosarcoma                               |
| BBK0500 | [M]Cellular leiomyoma                                       |
| BBK0700 | [M]Myxoid leiomyosarcoma                                    |
| BBK1.00 | [M]Angiomyomatous neoplasms                                 |
| BBK1000 | [M]Angiomyoma                                               |
| BBK1012 | [M]Vascular leiomyoma                                       |
| BBK1100 | [M]Angiomyosarcoma                                          |
| BBK1z00 | [M]Angiomyomatous neoplasm NOS                              |
| BBK2.00 | [M]Myoma and myosarcoma                                     |
| BBK2000 | [M]Myoma                                                    |
| BBK2100 | [M]Myosarcoma                                               |
| BBK2z00 | [M]Myoma or myosarcoma NOS                                  |
| BBK3000 | [M]Rhabdomyoma NOS                                          |
| BBK3100 | [M]Rhabdomyosarcoma NOS                                     |
| BBK3200 | [M]Pleomorphic rhabdomyosarcoma                             |
| BBK3600 | [M]Embryonal rhabdomyosarcoma                               |
| BBK3611 | [M]Sarcoma botryoides                                       |
| BBK3700 | [M]Alveolar rhabdomyosarcoma                                |
| BBK3800 | [M]Smooth muscle tumour NOS                                 |
| BBk5.00 | [M]Malig lymp, follicular centre cell, cleaved, follicular  |
| BBk8.00 | [M]Malig lymp,follicular centre cell,noncleaved,follicular  |
| BBkz.00 | [M]Lymphoma, nodular or follicular NOS                      |
| BBKz.00 | [M]Myomatous neoplasm NOS                                   |
| BBI..00 | [M]Mycosis fungoides                                        |
| BBL..00 | [M]Complex mixed and stromal neoplasms                      |
| BBI0.00 | [M]Mycosis fungoides                                        |
| BBL0.00 | [M]Endometrial stromal sarcoma                              |
| BBL1.00 | [M]Endolymphatic stromal myosis                             |

|         |                                                            |
|---------|------------------------------------------------------------|
| BBL2.00 | [M]Adenomyoma                                              |
| BBL4.00 | [M]Mixed tumour, malignant, NOS                            |
| BBL5.00 | [M]Mullerian mixed tumour                                  |
| BBL6.00 | [M]Mesodermal mixed tumour                                 |
| BBL7.00 | [M]Mixed and stromal renal neoplasms                       |
| BBL7.11 | [M]Nephromas and nephroblastomas                           |
| BBL7100 | [M]Nephroblastoma NOS                                      |
| BBL7111 | [M]Adenosarcoma                                            |
| BBL7112 | [M]Wilms' tumour                                           |
| BBL8.00 | [M]Hepatoblastoma                                          |
| BBL9.00 | [M]Carcinosarcoma NOS                                      |
| BBLA.00 | [M]Carcinosarcoma, embryonal type                          |
| BBLA.11 | [M]Pneumoblastoma                                          |
| BBLB.00 | [M]Myoepithelioma                                          |
| BBLC.00 | [M]Mesenchymomas                                           |
| BBLC100 | [M]Mesenchymoma, malignant                                 |
| BBLCz00 | [M]Mesenchymoma NOS                                        |
| BBLE.00 | [M]Adenosarcoma                                            |
| BBLF.00 | [M]Endometrial stromal nodule                              |
| BBLG.00 | [M]Carcinoma in pleomorphic adenoma                        |
| BBLH.00 | [M]Rhabdoid sarcoma                                        |
| BBLJ.00 | [M]Clear cell sarcoma of kidney                            |
| BBLM.00 | [M]Pulmonary blastoma                                      |
| BBLz.00 | [M]Complex mixed or stromal neoplasm NOS                   |
| BBm..00 | [M]Miscellaneous reticuloendothelial neoplasms             |
| BBM..00 | [M]Fibroepithelial neoplasms                               |
| BBm0.00 | [M]Microglioma                                             |
| BBM0.00 | [M]Brenner tumours                                         |
| BBM0000 | [M]Brenner tumour, borderline malignancy                   |
| BBM0100 | [M]Brenner tumour, malignant                               |
| BBm1.00 | [M]Malignant histiocytosis                                 |
| BBm1.11 | [M]Malignant reticulosis                                   |
| BBm3.00 | [M]Letterer - Siwe disease                                 |
| BBm3.12 | [M]Acute progressive histiocytosis X                       |
| BBm4.00 | [M]True histiocytic lymphoma                               |
| BBm5.00 | [M] Peripheral T-cell lymphoma NOS                         |
| BBm6.00 | [M] Alpha heavy chain disease                              |
| BBm7.00 | [M] Monoclonal gammopathy                                  |
| BBm8.00 | [M] Angioimmunoblastic lymphadenopathy                     |
| BBM8.00 | [M]Cystosarcoma phyllodes NOS                              |
| BBm9.00 | [M] Monocytoid B-cell lymphoma                             |
| BBM9.00 | [M]Cystosarcoma phyllodes, malignant                       |
| BBmA.00 | [M] Refractory anaemia with sideroblasts                   |
| BBmB.00 | [M]Refractory anaemia+excess of blasts with transformation |
| BBmC.00 | [M] T-gamma lymphoproliferative disease                    |
| BBmD.00 | [M] Cutaneous lymphoma                                     |
| BBmE.00 | [M] Gamma heavy chain disease                              |
| BBmF.00 | [M] Angiocentric immunoproliferative lesion                |
| BBmH.00 | [M] Large cell lymphoma                                    |
| BBmJ.00 | [M] Angioendotheliomatosis                                 |
| BBmK.00 | [M]Waldenstrom's macroglobulinaemia                        |
| BBMz.00 | [M]Fibroepithelial neoplasm NOS                            |
| BBn..00 | [M]Plasma cell tumours                                     |
| BBN..00 | [M]Synovial neoplasms                                      |
| BBn0.00 | [M]Plasma cell myeloma                                     |
| BBn0.11 | [M]Multiple myeloma                                        |
| BBn0.12 | [M]Myeloma NOS                                             |
| BBn0.13 | [M]Myelomatosis                                            |
| BBn0.14 | [M]Plasmacytic myeloma                                     |
| BBN1.00 | [M]Synovial sarcoma NOS                                    |
| BBN1.11 | [M]Synovioma NOS                                           |
| BBn2.00 | [M]Plasmacytoma NOS                                        |

|         |                                                  |
|---------|--------------------------------------------------|
| BBn2.12 | [M]Solitary myeloma                              |
| BBN4.00 | [M]Synovial sarcoma, biphasic type               |
| BBN5.00 | [M]Clear cell sarcoma of tendons and aponeuroses |
| BBnz.00 | [M]Plasma cell tumour NOS                        |
| BBNz.00 | [M]Synovial neoplasm NOS                         |
| BBp..00 | [M]Mast cell tumours                             |
| BBP..00 | [M]Mesothelial neoplasms                         |
| BBp0.00 | [M]Mastocytoma NOS                               |
| BBp1.00 | [M]Mast cell sarcoma                             |
| BBP1.00 | [M]Mesothelioma, malignant                       |
| BBp2.00 | [M]Malignant mastocytosis                        |
| BBP5.00 | [M]Epithelioid mesothelioma, malignant           |
| BBP7.00 | [M]Mesothelioma, biphasic type, malignant        |
| BBP9.00 | [M]Cystic mesothelioma                           |
| BBPX.00 | [M]Mesothelioma, unspecified                     |
| BBpz.00 | [M]Mast cell tumour NOS                          |
| BBPz.00 | [M]Mesothelial neoplasm NOS                      |
| BBQ..00 | [M]Germ cell neoplasms                           |
| BBQ1.00 | [M]Seminomas                                     |
| BBQ1000 | [M]Seminoma, anaplastic type                     |
| BBQ1100 | [M]Spermatocytic seminoma                        |
| BBQ1z00 | [M]Seminoma NOS                                  |
| BBQ3.00 | [M]Embryonal carcinoma NOS                       |
| BBQ4.00 | [M]Endodermal sinus tumour                       |
| BBQ4.12 | [M]Orchioblastoma                                |
| BBQ4.14 | [M]Yolk sac tumour                               |
| BBQ6.00 | [M]Gonadoblastoma                                |
| BBQB.00 | [M]Mixed germ cell tumour                        |
| BBQz.00 | [M]Germ cell neoplasm NOS                        |
| BBr..00 | [M]Leukaemias                                    |
| BBr0.00 | [M]Leukaemias unspecified                        |
| BBr0000 | [M]Leukaemia NOS                                 |
| BBr0100 | [M]Acute leukaemia NOS                           |
| BBr0111 | [M]Blast cell leukaemia                          |
| BBr0112 | [M]Blastic leukaemia                             |
| BBr0113 | [M]Stem cell leukaemia                           |
| BBr0200 | [M]Subacute leukaemia NOS                        |
| BBr0300 | [M]Chronic leukaemia NOS                         |
| BBr0400 | [M]Aleukaemic leukaemia NOS                      |
| BBr0z00 | [M]Leukaemia unspecified, NOS                    |
| BBr2.00 | [M]Lymphoid leukaemias                           |
| BBr2000 | [M]Lymphoid leukaemia NOS                        |
| BBr2011 | [M]Lymphatic leukaemia                           |
| BBr2100 | [M]Acute lymphoid leukaemia                      |
| BBr2300 | [M]Chronic lymphoid leukaemia                    |
| BBr2500 | [M]Prolymphocytic leukaemia                      |
| BBr2600 | [M]Burkitt's cell leukaemia                      |
| BBr2700 | [M]Adult T-cell leukaemia/lymphoma               |
| BBr3.00 | [M]Plasma cell leukaemias                        |
| BBr4.00 | [M]Erythroleukaemias                             |
| BBr4000 | [M]Erythroleukaemia                              |
| BBr6.00 | [M]Myeloid leukaemias                            |
| BBr6000 | [M]Myeloid leukaemia NOS                         |
| BBr6011 | [M]Granulocytic leukaemia NOS                    |
| BBr6100 | [M]Acute myeloid leukaemia                       |
| BBr6300 | [M]Chronic myeloid leukaemia                     |
| BBr6311 | [M]Naegeli-type monocytic leukaemia              |
| BBr6600 | [M]Acute promyelocytic leukaemia                 |
| BBr6700 | [M]Acute myelomonocytic leukaemia                |
| BBr6800 | [M]Chronic myelomonocytic leukaemia              |
| BBr6z00 | [M]Other myeloid leukaemia NOS                   |
| BBr8.00 | [M]Eosinophilic leukaemias                       |



|         |                                                              |
|---------|--------------------------------------------------------------|
| BBr8000 | [M]Eosinophilic leukaemia                                    |
| BBr9000 | [M]Monocytic leukaemia NOS                                   |
| BBrA.00 | [M]Miscellaneous leukaemias                                  |
| BBrA100 | [M]Megakaryocytic leukaemia                                  |
| BBrA111 | [M]Thrombocytic leukaemia                                    |
| BBrA300 | [M]Myeloid sarcoma                                           |
| BBrA400 | [M]Hairy cell leukaemia                                      |
| BBrA500 | [M]Acute megakaryoblastic leukaemia                          |
| BBrz.00 | [M]Leukaemia NOS                                             |
| BBs..00 | [M]Misc myeloproliferative and lymphoproliferative disorders |
| BBs0.00 | [M]Polycythaemia vera                                        |
| BBs4.00 | [M]Idiopathic thrombocythaemia                               |
| BBs5.00 | [M]Chronic lymphoproliferative disease                       |
| BBsz.00 | [M]Misc myeloproliferative or lymphoproliferative dis NOS    |
| BBT..00 | [M]Blood vessel tumours                                      |
| BBT0.12 | [M]Chorioangioma                                             |
| BBT1.00 | [M]Haemangiosarcoma                                          |
| BBT1.11 | [M]Angiosarcoma                                              |
| BBTA.00 | [M]Kaposi's sarcoma                                          |
| BBTB.00 | [M]Angiokeratoma                                             |
| BBTDz00 | [M]Haemangiopericytic neoplasm NOS                           |
| BBTF.00 | [M]Haemangioblastoma                                         |
| BBTF.11 | [M]Angioblastoma                                             |
| BBTK.00 | [M]Epithelioid haemangioendothelioma, malignant              |
| BBTL.00 | [M]Intravascular bronchial alveolar tumour                   |
| BBTz.00 | [M]Blood vessel tumour NOS                                   |
| BBU..00 | [M]Lymphatic vessel tumours                                  |
| BBU..11 | [M]Lymphangiomatous tumours                                  |
| BBU1.00 | [M]Lymphangiosarcoma                                         |
| BBU5.00 | [M]Lymphangiomyoma                                           |
| BBUz.00 | [M]Lymphatic vessel tumour NOS                               |
| BBV..00 | [M]Osteomas and osteosarcomas                                |
| BBV..11 | [M]Juxtacortical osteogenic sarcoma                          |
| BBV..12 | [M]Parosteal osteosarcoma                                    |
| BBV1.00 | [M]Osteosarcoma NOS                                          |
| BBV1.11 | [M]Osteoblastic sarcoma                                      |
| BBV1.12 | [M]Osteochondrosarcoma                                       |
| BBV1.13 | [M]Osteogenic sarcoma NOS                                    |
| BBV2.00 | [M]Chondroblastic osteosarcoma                               |
| BBV3.00 | [M]Fibroblastic osteosarcoma                                 |
| BBV4.00 | [M]Telangiectatic osteosarcoma                               |
| BBV5.00 | [M]Osteosarcoma in Paget's disease of bone                   |
| BBV9.00 | [M]Myxoid chondrosarcoma                                     |
| BBVA.00 | [M] Small cell osteosarcoma                                  |
| BBVz.00 | [M]Osteoma or osteosarcoma NOS                               |
| BBW..00 | [M]Chondromatous neoplasms                                   |
| BBW1.00 | [M]Osteochondromatosis NOS                                   |
| BBW1.11 | [M]Ecchondrosis                                              |
| BBW3.00 | [M]Chondromatosis NOS                                        |
| BBW4.00 | [M]Chondrosarcoma NOS                                        |
| BBW4.11 | [M]Fibrochondrosarcoma                                       |
| BBW6.00 | [M]Juxtacortical chondrosarcoma                              |
| BBW9.00 | [M]Mesenchymal chondrosarcoma                                |
| BBWz.00 | [M]Chondromatous neoplasm NOS                                |
| BBX..00 | [M]Giant cell tumours                                        |
| BBX0.00 | [M]Giant cell tumour of bone NOS                             |
| BBX1.00 | [M]Giant cell tumour of bone, malignant                      |
| BBX1.11 | [M]Giant cell bone sarcoma                                   |
| BBX1.12 | [M]Osteoclastoma, malignant                                  |
| BBX2.00 | [M]Giant cell tumour of soft parts NOS                       |
| BBXz.00 | [M]Giant cell tumour NOS                                     |
| BBY..00 | [M]Miscellaneous bone tumours                                |

|         |                                                               |
|---------|---------------------------------------------------------------|
| BBY0.00 | [M]Ewing's sarcoma                                            |
| BBY0.11 | [M]Endothelial bone sarcoma                                   |
| BByz.00 | [M]No microscopic confirmation of tumour, clinically NOS      |
| BBYz.00 | [M]Miscellaneous bone tumour NOS                              |
| BBz..00 | [M]Neoplasm morphology NOS                                    |
| BBZ1.00 | [M]Odontogenic tumour NOS                                     |
| BBZ2.00 | [M]Odontogenic tumour, malignant                              |
| BBZ2.11 | [M]Intraosseous carcinoma                                     |
| BBZ8.00 | [M]Odontoma NOS                                               |
| BBZA.00 | [M]Complex odontoma                                           |
| BBZB.00 | [M]Ameloblastic fibro-odontoma                                |
| BBZC.00 | [M]Ameloblastic odontosarcoma                                 |
| BBZN.00 | [M]Ameloblastic fibrosarcoma                                  |
| By...00 | Neoplasms otherwise specified                                 |
| Byu..00 | [X]Additional neoplasm classification terms                   |
| Byu0.00 | [X]Malignant neoplasm of lip, oral cavity and pharynx         |
| Byu1.00 | [X]Malignant neoplasm of digestive organs                     |
| Byu1100 | [X]Other specified carcinomas of liver                        |
| Byu1200 | [X]Malignant neoplasm of intestinal tract, part unspecified   |
| Byu1300 | [X]Malignant neoplasm/ill-defin sites within digestive system |
| Byu2.00 | [X]Malignant neoplasm of respiratory and intrathoracic orga   |
| Byu2000 | [X]Malignant neoplasm of bronchus or lung, unspecified        |
| Byu2100 | [X]Malignant neoplasm/overlap lesion/heart,mediastinm+pleura  |
| Byu2300 | [X]Malignant neopl/overlapping les/resp+intrathoracic organs  |
| Byu2400 | [X]Malignant neoplasm/ill-defined sites within resp system    |
| Byu2500 | [X]Malignant neoplasm of mediastinum, part unspecified        |
| Byu3.00 | [X]Malignant neoplasm of bone and articular cartilage         |
| Byu3100 | [X]Malignant neoplasm/bones+articular cartilage/limb,unspfd   |
| Byu3200 | [X]Malignant neoplasm/overlap lesion/bone+articulr cartilage  |
| Byu3300 | [X]Malignant neoplasm/bone+articular cartilage, unspecified   |
| Byu4.00 | [X]Melanoma and other malignant neoplasms of skin             |
| Byu4000 | [X]Malignant melanoma of other+unspecified parts of face      |
| Byu4100 | [X]Malignant melanoma of skin, unspecified                    |
| Byu4200 | [X]Oth malignant neoplasm/skin of oth+unspecfd parts of face  |
| Byu4300 | [X]Malignant neoplasm of skin, unspecified                    |
| Byu5.00 | [X]Malignant neoplasm of mesothelial and soft tissue          |
| Byu5000 | [X]Mesothelioma of other sites                                |
| Byu5011 | [X]Mesothelioma of lung                                       |
| Byu5100 | [X]Mesothelioma, unspecified                                  |
| Byu5300 | [X]Kaposi's sarcoma, unspecified                              |
| Byu5700 | [X]Malignant neoplasm of peritoneum, unspecified              |
| Byu5800 | [X]Mal neoplasm/connective+soft tissue of trunk,unspecified   |
| Byu5900 | [X]Malignant neoplasm/connective + soft tissue,unspecified    |
| Byu5A00 | [X]Malignant neoplasm overlapping lesion of skin              |
| Byu5B00 | [X]Kaposi's sarcoma of other sites                            |
| Byu6.00 | [X]Malignant neoplasm of breast                               |
| Byu7.00 | [X]Malignant neoplasm of female genital organs                |
| Byu7000 | [X]Malignant neoplasm of uterine adnexa, unspecified          |
| Byu7100 | [X]Malignant neoplasm/other specified female genital organs   |
| Byu7300 | [X]Malignant neoplasm of female genital organ, unspecified    |
| Byu8.00 | [X]Malignant neoplasm of male genital organs                  |
| Byu8000 | [X]Malignant neoplasm/other specified male genital organs     |
| Byu8200 | [X]Malignant neoplasm of male genital organ, unspecified      |
| Byu9.00 | [X]Malignant neoplasm of urinary tract                        |
| Byu9000 | [X]Malignant neoplasm of urinary organ, unspecified           |
| ByuA.00 | [X]Malignant neoplasm of eye, brain and other parts of cent   |
| ByuA000 | [X]Malignant neoplasm/other and unspecified cranial nerves    |
| ByuA100 | [X]Malignant neoplasm/central nervous system, unspecified     |
| ByuA200 | [X]Malignant neoplasm of meninges, unspecified                |
| ByuA300 | [X]Malig neopl, overlap lesion brain & other part of CNS      |
| ByuB.00 | [X]Malignant neoplasm of thyroid and other endocrine glands   |
| ByuB100 | [X]Malignant neoplasm of endocrine gland, unspecified         |

|         |                                                              |
|---------|--------------------------------------------------------------|
| ByuC.00 | [X]Malignant neoplasm of ill-defined, secondary and unspeci  |
| ByuC000 | [X]Malignant neoplasm of other specified sites               |
| ByuC100 | [X]Malignant neoplasm/overlap lesion/other+ill-defined sites |
| ByuC200 | [X]2ndry+unspcf malignant neoplasm lymph nodes/multi regions |
| ByuC300 | [X]Secondary malignant neoplasm/oth+unspc respiratory organs |
| ByuC400 | [X]Secondary malignant neoplasm/oth+unspcfd digestive organs |
| ByuC500 | [X]2ndry malignant neoplasm/bladder+oth+unsp urinary organs  |
| ByuC600 | [X]2ndry malignant neoplasm/oth+unspec parts/nervous system  |
| ByuC700 | [X]Secondary malignant neoplasm of other specified sites     |
| ByuC800 | [X]Malignant neoplasm without specification of site          |
| ByuD.00 | [X]Malignant neoplasms of lymphoid, haematopoietic and rela  |
| ByuD000 | [X]Other Hodgkin's disease                                   |
| ByuD100 | [X]Other types of follicular non-Hodgkin's lymphoma          |
| ByuD200 | [X]Other types of diffuse non-Hodgkin's lymphoma             |
| ByuD300 | [X]Other specified types of non-Hodgkin's lymphoma           |
| ByuD500 | [X]Other lymphoid leukaemia                                  |
| ByuD600 | [X]Other myeloid leukaemia                                   |
| ByuD700 | [X]Other monocytic leukaemia                                 |
| ByuD800 | [X]Other specified leukaemias                                |
| ByuD900 | [X]Other leukaemia of unspecified cell type                  |
| ByuDB00 | [X]Mal neoplasm/lymphoid,haematopoietic+related tissu,unspcf |
| ByuDC00 | [X]Diffuse non-Hodgkin's lymphoma, unspecified               |
| ByuDE00 | [X]Unspecified B-cell non-Hodgkin's lymphoma                 |
| ByuDF00 | [X]Non-Hodgkin's lymphoma, unspecified type                  |
| ByuDF11 | [X]Non-Hodgkin's lymphoma NOS                                |
| ByuE.00 | [X]Malignant neoplasms/independent (primary) multiple sites  |
| ByuE000 | [X]Malignant neoplasms/independent(primary)multiple sites    |
| Bz...00 | Neoplasms NOS                                                |
| C333.00 | Macroglobulinaemia                                           |
| C333000 | Waldenstrom's macroglobulinaemia                             |
| C333100 | Alpha heavy chain disease                                    |
| C333200 | Gamma heavy chain disease                                    |
| C333z00 | Macroglobulinaemia NOS                                       |
| D212000 | Anaemia in ovarian carcinoma                                 |
| F381000 | Eaton-Lambert syndrome                                       |
| F381100 | Myasthenic syndrome due to other malignancy                  |
| F396200 | Myopathy due to malignant disease                            |
| F431400 | Metastatic disseminated retinitis                            |
| F456400 | Glaucoma due to ocular tumour or cyst                        |
| H51y700 | Malignant pleural effusion                                   |
| L241.00 | Tumour of uterine body in pregnancy/childbirth/puerperium    |
| L241000 | Tumour of uterine body affecting obstetric care              |
| L241100 | Tumour of uterine body - baby delivered                      |
| L241200 | Tumour of uterine body - baby delivered + p/n complication   |
| L241300 | Tumour of uterine body complicating a/n care, baby not deliv |
| L241z00 | Uterine body tumour in pregnancy/childbirth/puerperium NOS   |
| N330900 | Osteoporosis in multiple myelomatosis                        |
| Z4B3.00 | Cancer counselling                                           |
| ZG42.00 | Advice on cancer                                             |
| ZG42200 | Advice on testicular cancer                                  |
| ZR38.00 | Cancer attitude inventory                                    |
| ZR38.11 | CAI - Cancer attitude inventory                              |
| ZRVy.00 | Mental adjustment to cancer scale                            |
| ZV10.00 | [V]Personal history of malignant neoplasm                    |
| ZV10000 | [V]Personal history of malig neop of gastrointestinal tract  |
| ZV10011 | [V]Personal history of malignant neoplasm of anus            |
| ZV10012 | [V]Personal history of malig neop of gastrointestinal tract  |
| ZV10014 | [V]Personal history of malignant neoplasm of large intestine |
| ZV10015 | [V]Personal history of malignant neoplasm of liver           |
| ZV10016 | [V]Personal history of malignant neoplasm of oesophagus      |
| ZV10017 | [V]Personal history of malignant neoplasm of rectum          |
| ZV10018 | [V]Personal history of malignant neoplasm of stomach         |

|         |                                                              |
|---------|--------------------------------------------------------------|
| ZV10019 | [V]Personal history of malignant neoplasm of tongue          |
| ZV10100 | [V]Personal history of malig neop of trachea/bronchus/lung   |
| ZV10111 | [V]Personal history of malignant neoplasm of bronchus        |
| ZV10112 | [V]Personal history of malignant neoplasm of lung            |
| ZV10200 | [V]Personal history of malig neop other intrathoracic organ  |
| ZV10211 | [V]Personal history of malignant neoplasm - accessory sinus  |
| ZV10212 | [V]Personal history of malignant neoplasm of larynx          |
| ZV10214 | [V]Personal history of malignant neoplasm of nose            |
| ZV10300 | [V]Personal history of malignant neoplasm of breast          |
| ZV10400 | [V]Personal history of malignant neoplasm of genital organ   |
| ZV10411 | [V]Personal history of malignant neoplasm of cervix uteri    |
| ZV10414 | [V]Personal history of malignant neoplasm of ovary           |
| ZV10415 | [V]Personal history of malignant neoplasm of prostate        |
| ZV10416 | [V]Personal history of malignant neoplasm of testis          |
| ZV10417 | [V]Personal history of malignant neoplasm of uterine body    |
| ZV10500 | [V]Personal history of malignant neoplasm of urinary organ   |
| ZV10511 | [V]Personal history of malignant neoplasm of bladder         |
| ZV10512 | [V]Personal history of malignant neoplasm of kidney          |
| ZV10513 | [V]Personal history of malignant neoplasm of kidney          |
| ZV10600 | [V]Personal history of leukaemia                             |
| ZV10611 | [V]Personal history of lymphoid leukaemia                    |
| ZV10700 | [V]Personal history other lymphatic/haematopoietic neoplasm  |
| ZV10711 | [V]Personal history of Hodgkin's disease                     |
| ZV10y00 | [V]Personal history of other specified malignant neoplasm    |
| ZV10y11 | [V]Personal history of malignant neoplasm of bone            |
| ZV10y12 | [V]Personal history of malignant neoplasm of brain           |
| ZV10y14 | [V]Personal history of malignant neoplasm of skin            |
| ZV10y15 | [V]Personal history of malignant neoplasm of thyroid         |
| ZV10y16 | [V]Personal history of malignant neoplasm of tongue          |
| ZV10z00 | [V]Personal history of unspecified malignant neoplasm        |
| ZV67600 | [V]Follow-up examination aft surgery for malignant neoplasm  |
| ZV67700 | [V]Follow-up exam after radiotherapy for malignant neoplasm  |
| ZV67800 | [V]Follow-up examin after chemotherapy for malign neoplasm   |
| ZV67811 | [V]Follow-up examination after chemotherapy for leukaemia    |
| ZV67900 | [V]Follow-up exam aft combined treatment for malig neoplasm  |
| ZV67A00 | [V]Folow-up exam aft other treatment for malignant neoplasm  |
| ZV67B00 | [V]Folow-up exam aft unspec treatment for malignant neoplasm |
| 100..00 | Cancer confirmed                                             |
| 44a..00 | Tumour marker levels                                         |
| 44a4.00 | Squamous cell carcinoma antigen level                        |
| 4C53.00 | Bone marrow: myeloma cells                                   |
| 4C54.00 | Bone marrow: tumour cells                                    |
| 4KJ..00 | Tumour hormone receptor status                               |
| 4KJ0.00 | Oestrogen receptor positive tumour                           |
| 4KJ1.00 | Progesterone receptor positive tumour                        |
| 4KJ2.00 | Oestrogen receptor negative tumour                           |
| 4M...00 | Tumour staging                                               |
| 4M0..00 | Gleason grading of prostate cancer                           |
| 4M00.00 | Gleason prostate grade 2-4 (low)                             |
| 4M01.00 | Gleason prostate grade 5-7 (medium)                          |
| 4M02.00 | Gleason prostate grade 8-10 (high)                           |
| 4M1..00 | Dukes staging system                                         |
| 4M10.00 | Dukes stage A                                                |
| 4M11.00 | Dukes stage B                                                |
| 4M12.00 | Dukes stage C1                                               |
| 4M13.00 | Dukes stage C2                                               |
| 4M14.00 | Dukes stage D                                                |
| 4M2..00 | Lymphoma staging system                                      |
| 4M20.00 | Lymphoma stage I                                             |
| 4M21.00 | Lymphoma stage II                                            |
| 4M22.00 | Lymphoma stage III                                           |
| 4M23.00 | Lymphoma stage IV                                            |
| 4M3..00 | Breslow depth staging for melanoma                           |

|         |                                                              |
|---------|--------------------------------------------------------------|
| 4M4..00 | FIGO staging of gynaecological malignancy                    |
| 4M5..00 | TNM tumour staging                                           |
| 4M6..00 | Recurrence of tumour                                         |
| 4M7..00 | Clark staging levels                                         |
| 4M70.00 | Clark melanoma level 1                                       |
| 4M72.00 | Clark melanoma level 3                                       |
| 5135.00 | Radiological tumour control                                  |
| 5136.00 | X-ray metastasis control                                     |
| 5149.00 | Radiotherapy-tumour palliation                               |
| 5A12.00 | Thyroid tumour/metast irradiat                               |
| 5A15.00 | Bone tumour/metast.irradiat.                                 |
| 7131211 | Lumpectomy of breast                                         |
| 7131300 | Wire guided excision of breast lump under radiolog control   |
| 7932400 | Resection of heart tumour                                    |
| 7B27.13 | TURBT - transurethral resection of bladder tumour            |
| 7B27900 | Endoscopic destruction of bladder tumour by laser            |
| 7G03K00 | Excision malignant skin tumour                               |
| 7G05D00 | Excision biopsy of basal cell carcinoma                      |
| 7K13500 | Curettage of tumour of bone and graft HFQ                    |
| 7K13600 | Curettage of tumour of bone NEC                              |
| 7K13700 | Excision of tumour of bone NEC                               |
| 7K13900 | Excision of tumour of bone                                   |
| 7L1K300 | Debulking of tumour of unspecified organ                     |
| 8A9..00 | Tumour marker monitoring                                     |
| 8B3p.00 | Administration of cancer treatment                           |
| 8BAD000 | Cancer chemotherapy                                          |
| 8BAV.00 | Cancer care review                                           |
| 8BC3.00 | Cancer care plan given                                       |
| 8BC6.00 | Cancer treatment started                                     |
| 8BCF.00 | Cancer hospital treatment completed                          |
| 8CL0.00 | Cancer diagnosis discussed                                   |
| 8CL1.00 | Cancer diagnosis discussed with significant other            |
| 8CL2.00 | Cancer diagnosis discussed with patient                      |
| 8CM0.00 | Cancer care plan                                             |
| 8CP0.00 | Cancer care plan discussed with patient                      |
| 8CP1.00 | Cancer care plan discussed with significant other            |
| 8CR8.00 | Cancer shared care medication card                           |
| 8HH8.00 | Referred to cancer primary healthcare multidisciplinary team |
| 8Hht.00 | Fast track cancer referral                                   |
| 8Hn..00 | Priority cancer referral                                     |
| 8O83.00 | Cancer emotional and psychosocial support and advice         |
| 9e00.00 | GP out of hours service notified of cancer care plan         |
| 9h8..00 | Exception reporting: cancer quality indicators               |
| 9h81.00 | Excepted from cancer quality indicators: Patient unsuitable  |
| 9h82.00 | Excepted from cancer quality indicators: Informed dissent    |
| 9N4S.00 | DNA - Did not attend cancer clinic                           |
| 9Nh1.00 | Under care cancer primary healthcare multidisciplinary team  |
| 9NX0.00 | Cancer primary healthcare multidisciplinary team             |
| 9Ok..00 | Cancer monitoring administration                             |
| 9Ok0.00 | Cancer monitoring first letter                               |
| 9Ok1.00 | Cancer monitoring second letter                              |
| 9Ok2.00 | Cancer monitoring third letter                               |
| 9Ok3.00 | Date cancer diagnosis received in primary care               |
| 9Ok5.00 | Cancer pain and symptom management                           |
| 9Ok6.00 | Cancer short term health assessment                          |
| 9Ok7.00 | Cancer rehabilitation and readaption                         |
| 9OkB.00 | Cancer monitoring telephone invitation                       |
| 9OkC.00 | Patient on regional cancer register                          |
| A788W00 | HIV disease resulting in unspecified malignant neoplasm      |
| A789500 | HIV disease resulting in Kaposi's sarcoma                    |
| A789600 | HIV disease resulting in Burkitt's lymphoma                  |
| A789700 | HIV dis resulting oth types of non-Hodgkin's lymphoma        |

AyuC600 [X]HIV disease resulting in other non-Hodgkin's lymphoma

**LVD**

| <b>Read code</b> | <b>Description</b>                                          |
|------------------|-------------------------------------------------------------|
| 662M.00          | Stroke monitoring                                           |
| G656.00          | Vertebrobasilar insufficiency                               |
| 7A44000          | Percutaneous transluminal angioplasty of iliac artery       |
| G715000          | Thoracoabdominal aortic aneurysm, ruptured                  |
| 7920300          | Saphenous vein graft replacement of four+ coronary arteries |
| 7A47.16          | Other emergency bypass of femoral artery                    |
| G311500          | Acute coronary syndrome                                     |
| G300.00          | Acute anterolateral infarction                              |
| G30X000          | Acute ST segment elevation myocardial infarction            |
| 7A48.15          | Other bypass of popliteal artery                            |
| G671z00          | Generalised ischaemic cerebrovascular disease NOS           |
| 7A20311          | Carotid endarterectomy and patch                            |
| SP07600          | Coronary artery bypass graft occlusion                      |
| G33z700          | Stable angina                                               |
| G668.00          | Right sided CVA                                             |
| 662K.00          | Angina control                                              |
| G30..11          | Attack - heart                                              |
| 14AB.00          | H/O: TIA                                                    |
| G713.11          | Ruptured abdominal aortic aneurysm                          |
| G67..00          | Other cerebrovascular disease                               |
| 8HBJ.00          | Stroke / transient ischaemic attack referral                |
| G30z.00          | Acute myocardial infarction NOS                             |
| 662K200          | Angina control - improving                                  |
| 7A12111          | Aorto bifemoral graft                                       |
| G301z00          | Anterior myocardial infarction NOS                          |
| G305.00          | Lateral myocardial infarction NOS                           |
| 7A20000          | Replacement of carotid artery using graft                   |
| G641.00          | Cerebral embolism                                           |
| G64z.11          | Brainstem infarction NOS                                    |
| 662Kz00          | Angina control NOS                                          |
| 662K100          | Angina control - poor                                       |
| 7A12300          | Bypass bifurcation aorta by anastom aorta to iliac artery   |
| G65zz00          | Transient cerebral ischaemia NOS                            |
| G32..11          | Healed myocardial infarction                                |
| G65z100          | Intermittent cerebral ischaemia                             |
| G640.00          | Cerebral thrombosis                                         |
| G669.00          | Cerebral palsy, not congenital or infantile, acute          |
| G30A.00          | Mural thrombosis                                            |
| G311200          | Angina at rest                                              |
| G664.00          | Cerebellar stroke syndrome                                  |
| G714.11          | AAA - Abdominal aortic aneurysm without mention of rupture  |
| G32..12          | Personal history of myocardial infarction                   |
| J421.11          | Angina - abdominal                                          |
| G30..17          | Silent myocardial infarction                                |
| G713.00          | Abdominal aortic aneurysm which has ruptured                |
| G301100          | Acute anteroseptal infarction                               |
| 7A4B800          | Percut translum thrombolysis femoral graft streptokinase    |
| 7A48.14          | Other bypass of femoral artery                              |
| G311400          | Worsening angina                                            |
| G330000          | Nocturnal angina                                            |
| 7920             | Saphenous vein graft replacement of coronary artery         |
| ZV45800          | [V]Presence of coronary angioplasty implant and graft       |
| 7928000          | Percut transluminal balloon angioplasty one coronary artery |
| 662e.00          | Stroke/CVA annual review                                    |
| G660.00          | Middle cerebral artery syndrome                             |
| 8HTQ.00          | Referral to stroke clinic                                   |
| 7A49200          | Endarterectomy of femoral artery NEC                        |
| G35..00          | Subsequent myocardial infarction                            |
| 7929300          | Rotary blade coronary angioplasty                           |
| 9Om..00          | Stroke/transient ischaemic attack monitoring administration |

| <b>Read code</b> | <b>Description</b>                                         |
|------------------|------------------------------------------------------------|
| 7924200          | Revision of bypass for three coronary arteries             |
| 7922             | Allograft replacement of coronary artery                   |
| 792y.00          | Other specified operations on coronary artery              |
| 7929z00          | Other therapeutic transluminal op on coronary artery NOS   |
| 7A28000          | Percutaneous transluminal angioplasty of subclavian artery |
| G30..00          | Acute myocardial infarction                                |
| G65..00          | Transient cerebral ischaemia                               |
| G64..12          | Infarction - cerebral                                      |
| 7928z00          | Transluminal balloon angioplasty of coronary artery NOS    |
| 7A54000          | Percutaneous transluminal angioplasty of artery NEC        |
| 792..11          | Coronary artery bypass graft operations                    |
| G30..14          | Heart attack                                               |
| G66..11          | CVA unspecified                                            |
| G33z300          | Angina on effort                                           |
| G33..00          | Angina pectoris                                            |
| G311.13          | Unstable angina                                            |
| G65..12          | Transient ischaemic attack                                 |
| G66..00          | Stroke and cerebrovascular accident unspecified            |
| G30..15          | MI - acute myocardial infarction                           |
| G308.00          | Inferior myocardial infarction NOS                         |
| G714.00          | Abdominal aortic aneurysm without mention of rupture       |
| G65z.00          | Transient cerebral ischaemia NOS                           |
| 7A48z00          | Other bypass of femoral artery or popliteal artery NOS     |
| G65..13          | Vertebro-basilar insufficiency                             |
| G6...00          | Cerebrovascular disease                                    |
| 7A20400          | Endarterectomy of carotid artery NEC                       |
| 7A12100          | Bypass bifurc aorta by anastom aorta to femoral artery NEC |
| 7928             | Transluminal balloon angioplasty of coronary artery        |
| G64z.00          | Cerebral infarction NOS                                    |
| 792Dy00          | Other specified other bypass of coronary artery            |
| 7A52100          | Endarterectomy NEC                                         |
| G307.00          | Acute subendocardial infarction                            |
| 7A12311          | Aorto biiliac graft                                        |
| G32..00          | Old myocardial infarction                                  |
| G311.11          | Crescendo angina                                           |
| ZV45K00          | [V]Presence of coronary artery bypass graft                |
| G64z111          | Lateral medullary syndrome                                 |
| G650.11          | Insufficiency - basilar artery                             |
| G64..11          | CVA - cerebral artery occlusion                            |
| G301.00          | Other specified anterior myocardial infarction             |
| G64z.12          | Cerebellar infarction                                      |
| ZV45K11          | [V]Presence of coronary artery bypass graft - CABG         |
| 7928.11          | Percutaneous balloon coronary angioplasty                  |
| 7927500          | Open angioplasty of coronary artery                        |
| 14A7.12          | H/O: stroke                                                |
| 792..00          | Coronary artery operations                                 |
| G66..13          | CVA - Cerebrovascular accident unspecified                 |
| G64..13          | Stroke due to cerebral arterial occlusion                  |
| 7929y00          | Other therapeutic transluminal op on coronary artery OS    |
| G68X.00          | Sequelae of stroke,not specfd as h'morrhage or infarction  |
| G66..12          | Stroke unspecified                                         |
| 7A4B200          | Percutaneous transluminal embolectomy of femoral artery    |
| 14A7.11          | H/O: CVA                                                   |
| 14A5.00          | H/O: angina pectoris                                       |
| 7A4B000          | Percutaneous transluminal angioplasty of femoral artery    |
| G655.00          | Transient global amnesia                                   |
| ZV45L00          | [V]Status following coronary angioplasty NOS               |
| 7921.11          | Other autograft bypass of coronary artery                  |
| 7920y00          | Saphenous vein graft replacement of coronary artery OS     |
| ZV12512          | [V]Personal history of cerebrovascular accident (CVA)      |
| G311100          | Unstable angina                                            |



| <b>Read code</b> | <b>Description</b>                                           |
|------------------|--------------------------------------------------------------|
| 7920200          | Saphenous vein graft replacement of three coronary arteries  |
| 7921z00          | Other autograft replacement of coronary artery NOS           |
| 7920100          | Saphenous vein graft replacement of two coronary arteries    |
| G33z200          | Syncope anginosa                                             |
| G667.00          | Left sided CVA                                               |
| 323..00          | ECG: myocardial infarction                                   |
| 7920.11          | Saphenous vein graft bypass of coronary artery               |
| G663.00          | Brain stem stroke syndrome                                   |
| 7920000          | Saphenous vein graft replacement of one coronary artery      |
| G64..00          | Cerebral arterial occlusion                                  |
| G302.00          | Acute inferolateral infarction                               |
| 7929400          | Insertion of coronary artery stent                           |
| 7A47.00          | Other emergency bypass of femoral artery or popliteal artery |
| 7921             | Other autograft replacement of coronary artery               |
| G307000          | Acute non-Q wave infarction                                  |
| G33z500          | Post infarct angina                                          |
| G38..00          | Postoperative myocardial infarction                          |
| G33z400          | Ischaemic chest pain                                         |
| 7922.11          | Allograft bypass of coronary artery                          |
| G30B.00          | Acute posterolateral myocardial infarction                   |
| G651.00          | Vertebral artery syndrome                                    |
| 7924             | Revision of bypass for coronary artery                       |
| 792Dz00          | Other bypass of coronary artery NOS                          |
| G665.00          | Pure motor lacunar syndrome                                  |
| G6X..00          | Cerebrl infarctn due/unspcfl occlusn or sten/cerebrl artrts  |
| 792B.00          | Repair of coronary artery NEC                                |
| 7929100          | Percut transluminal coronary thrombolysis with streptokinase |
| 7928100          | Percut translum balloon angioplasty mult coronary arteries   |
| G67y.00          | Other cerebrovascular disease OS                             |
| 14A7.00          | H/O: CVA/stroke                                              |
| G311300          | Refractory angina                                            |
| G641.11          | Cerebral embolus                                             |
| G30y.00          | Other acute myocardial infarction                            |
| 792D.00          | Other bypass of coronary artery                              |
| G501.00          | Post infarction pericarditis                                 |
| 14A3.00          | H/O: myocardial infarct <60                                  |
| 7A20300          | Endarterectomy and patch repair of carotid artery            |
| 7A19100          | Endarterectomy of aorta NEC                                  |
| 7923.11          | Prosthetic bypass of coronary artery                         |
| 7A42011          | Endarterectomy and patch repair of common iliac artery       |
| 7A49300          | Endarterectomy of popliteal artery NEC                       |
| G36..00          | Certain current complication follow acute myocardial infarct |
| G718.00          | Leaking abdominal aortic aneurysm                            |
| G64z200          | Left sided cerebral infarction                               |
| G6z..00          | Cerebrovascular disease NOS                                  |
| 7921200          | Autograft replacement of three coronary arteries NEC         |
| G64z300          | Right sided cerebral infarction                              |
| G307100          | Acute non-ST segment elevation myocardial infarction         |
| 792z.00          | Coronary artery operations NOS                               |
| G311.00          | Preinfarction syndrome                                       |
| G640000          | Cerebral infarction due to thrombosis of cerebral arteries   |
| G332.00          | Coronary artery spasm                                        |
| 7A12.00          | Other bypass of bifurcation of aorta                         |
| 7A28100          | Percutaneous transluminal angioplasty of brachial artery     |
| G362.00          | Ventric septal defect/curr comp fol acut myocardal infarctn  |
| 7A48.12          | Other bypass of common femoral artery                        |
| 7A22300          | Percutaneous transluminal insertion stent carotid artery     |
| L440.11          | CVA - cerebrovascular accident in the puerperium             |
| G64z100          | Wallenberg syndrome                                          |
| 7A4B900          | Percutaneous transluminal insertion of stent femoral artery  |
| 7A1C000          | Endovas ins stent graft for infrarenal abdom aortic aneurysm |

| Read code | Description                                                  |
|-----------|--------------------------------------------------------------|
| G30y000   | Acute atrial infarction                                      |
| 7A52000   | Endarterectomy and patch repair of artery NEC                |
| 7A49000   | Endarterectomy and patch repair of femoral artery            |
| 7925.11   | Creation of bypass from mammary artery to coronary artery    |
| 7A4B100   | Percutaneous transluminal angioplasty of popliteal artery    |
| 662K300   | Angina control - worsening                                   |
| G366.00   | Thrombosis atrium,auric append&vent/curr comp foll acute MI  |
| G303.00   | Acute inferoposterior infarction                             |
| G30X.00   | Acute transmural myocardial infarction of unspecif site      |
| 7923z00   | Prosthetic replacement of coronary artery NOS                |
| G662.00   | Posterior cerebral artery syndrome                           |
| G661.00   | Anterior cerebral artery syndrome                            |
| ZV12511   | [V]Personal history of stroke                                |
| G65y.00   | Other transient cerebral ischaemia                           |
| 7923      | Prosthetic replacement of coronary artery                    |
| 7921100   | Autograft replacement of two coronary arteries NEC           |
| 662K000   | Angina control - good                                        |
| G311.14   | Angina at rest                                               |
| 792A000   | Percutaneous transluminal angioscopy                         |
| 7A14400   | Replace aneurysm abdominal aorta by anast aorta to aorta NEC |
| G330.00   | Angina decubitus                                             |
| 7A20.00   | Reconstruction of carotid artery                             |
| 7A20200   | Bypass to carotid artery NEC                                 |
| 7A6G100   | Peroperative angioplasty                                     |
| G651000   | Vertebro-basilar artery syndrome                             |
| 7A48E00   | Femoro-femoral prosthetic cross over graft                   |
| 792B000   | Endarterectomy of coronary artery NEC                        |
| 7929000   | Percutaneous transluminal laser coronary angioplasty         |
| 7A35100   | Percutaneous transluminal angioplasty sup mesenteric art NEC |
| 7A10100   | Bypass aorta by anastomosis axillary to femoral artery NEC   |
| G68..00   | Late effects of cerebrovascular disease                      |
| G652.00   | Subclavian steal syndrome                                    |
| G310.00   | Postmyocardial infarction syndrome                           |
| G63y000   | Cerebral infarct due to thrombosis of precerebral arteries   |
| G361.00   | Atrial septal defect/curr comp folow acut myocardal infarct  |
| G304.00   | Posterior myocardial infarction NOS                          |
| G650.00   | Basilar artery syndrome                                      |
| 7A48300   | Bypass popliteal artery by pop/pop a anast c vein graft NEC  |
| G360.00   | Haemopericardium/current comp folow acut myocard infarct     |
| G63y100   | Cerebral infarction due to embolism of precerebral arteries  |
| 7A48.00   | Other bypass of femoral artery or popliteal artery           |
| 7A4B600   | Arteriography of femoral artery                              |
| 7929      | Other therapeutic transluminal operations on coronary artery |
| G64z000   | Brainstem infarction                                         |
| G33z.00   | Angina pectoris NOS                                          |
| 7A32000   | Percutaneous transluminal angioplasty of renal artery        |
| 7A22.00   | Transluminal operations on carotid artery                    |
| 7A14411   | Tube graft of Abdominal aortic aneurysm                      |
| G64z400   | Infarction of basal ganglia                                  |
| G33z600   | New onset angina                                             |
| 3234      | ECG:posterior/inferior infarct                               |
| 7A48000   | Bypass femoral artery by fem/pop art anast c prosthesis NEC  |
| G641000   | Cerebral infarction due to embolism of cerebral arteries     |
| 7A48200   | Bypass femoral artery by fem/pop art anast c vein graft NEC  |
| G714100   | Inflammatory abdominal aortic aneurysm                       |
| 7A12112   | Dacron aortofemoral Y graft                                  |
| SP01100   | Mechanical complication of aortic graft                      |
| G33zz00   | Angina pectoris NOS                                          |
| G330z00   | Angina decubitus NOS                                         |
| 7A22000   | Percutaneous transluminal angioplasty of carotid artery      |
| 7A1A000   | Percutaneous transluminal balloon angioplasty of aorta       |

| Read code | Description                                                  |
|-----------|--------------------------------------------------------------|
| G309.00   | Acute Q-wave infarct                                         |
| G30..13   | Cardiac rupture following myocardial infarction (MI)         |
| 7A1A100   | Percutaneous transluminal angioplasty of aorta NEC           |
| 7A20700   | Intracranial bypass from carotid artery NEC                  |
| Gyu6600   | [X]Occlusion and stenosis of other cerebral arteries         |
| 7923000   | Prosthetic replacement of one coronary artery                |
| 7A26500   | Endarterectomy of subclavian artery NEC                      |
| 7A11211   | Y graft of abdominal Aortic aneurysm (emergency)             |
| 7929600   | Percutaneous transluminal atherectomy of coronary artery     |
| 792Cy00   | Other specified replacement of coronary artery               |
| 7A1C400   | Endovas insertion of stent graft for aortic bifurcation NEC  |
| G63..11   | Infarction - precerebral                                     |
| 7924z00   | Revision of bypass for coronary artery NOS                   |
| 7A49400   | Profundoplasty femoral artery & patch repair deep fem artery |
| ZR3P.11   | CLASP angina score                                           |
| 388F.00   | Cardiovascular Limitations and Symptoms Profile angina score |
| G363.00   | Ruptur cardiac wall w/out haemopericard/cur comp fol ac MI   |
| ZR37.00   | Canadian Cardiovascular Society classification of angina     |
| 7922y00   | Other specified allograft replacement of coronary artery     |
| 7A42012   | Iliac endarterectomy and patch                               |
| G364.00   | Ruptur chordae tendinae/curr comp fol acute myocard infarct  |
| 7A28C00   | Percutaneous transluminal angioplasty of axillary artery     |
| 7A48500   | Bypass popliteal artery by pop/tib a anast c prosthesis NEC  |
| 7A47300   | Emerg bypass pop art by pop/pop art anast c vein graft NEC   |
| 7A26600   | Endarterectomy of brachial artery NEC                        |
| G311000   | Myocardial infarction aborted                                |
| 7921y00   | Other autograft replacement of coronary artery OS            |
| 7A48.11   | Other bypass of femoral or popliteal artery by anastomosis   |
| G30y100   | Acute papillary muscle infarction                            |
| 7A47B00   | Emerg bypass pop art by pop/peron art anast c vein graft NEC |
| G351.00   | Subsequent myocardial infarction of inferior wall            |
| 7A54500   | Rotary blade angioplasty                                     |
| G676000   | Cereb infarct due cerebral venous thrombosis, nonpyogenic    |
| G683.00   | Sequelae of cerebral infarction                              |
| 7A4B611   | Arteriography of popliteal artery                            |
| G312.00   | Coronary thrombosis not resulting in myocardial infarction   |
| Gyu3000   | [X]Other forms of angina pectoris                            |
| 3889      | Euroscore for angina                                         |
| 7A47.14   | Other emergency bypass of popliteal artery                   |
| 7A48400   | Bypass femoral artery by fem/tib art anast c prosthesis NEC  |
| 3232      | ECG: old myocardial infarction                               |
| G671.00   | Generalised ischaemic cerebrovascular disease NOS            |
| 14A4.00   | H/O: myocardial infarct >60                                  |
| G301000   | Acute anteroapical infarction                                |
| 7A4B500   | Percutaneous transluminal embolisation of popliteal artery   |
| 7A48.16   | Other bypass of superficial femoral artery                   |
| G6W..00   | Cereb infarct due unsp occlus/stenos precerebr arteries      |
| G716000   | Thoracoabdominal aortic aneurysm, without mention of rupture |
| 7929111   | Percut translum coronary thrombolytic therapy- streptokinase |
| 7A35300   | Percutaneous transluminal angioplasty suprarenal artery NEC  |
| G30y200   | Acute septal infarction                                      |
| 7928y00   | Transluminal balloon angioplasty of coronary artery OS       |
| 7A4By00   | Transluminal operation on femoral or popliteal artery OS     |
| 7A22z00   | Transluminal operation on carotid artery NOS                 |
| 7A48600   | Bypass femoral artery by fem/tib art anast c vein graft NEC  |
| G384.00   | Postoperative subendocardial myocardial infarction           |
| 7A48D00   | Bypass popliteal artery by pop/fem artery anastomosis NEC    |
| 7929500   | Insertion of drug-eluting coronary artery stent              |
| L440.00   | Cerebrovascular disorders in the puerperium                  |
| 7928200   | Percut translum balloon angioplasty bypass graft coronary a  |
| 7A12312   | Dacron aortoiliac Y graft                                    |

| Read code | Description                                                  |
|-----------|--------------------------------------------------------------|
| 7A48y00   | Other bypass of femoral artery or popliteal artery OS        |
| 7921300   | Autograft replacement of four or more coronary arteries NEC  |
| 7A19000   | Endarterectomy of aorta and patch repair of aorta            |
| 7A20100   | Intracranial bypass to carotid artery                        |
| 7A47000   | Emerg bypass femoral art by fem/pop art anast c prosth NEC   |
| 7A42111   | Endarterectomy of common iliac artery NEC                    |
| 7921000   | Autograft replacement of one coronary artery NEC             |
| 792Bz00   | Repair of coronary artery NOS                                |
| G653.00   | Carotid artery syndrome hemispheric                          |
| 7922300   | Allograft replacement of four or more coronary arteries      |
| 7A48C00   | Bypass femoral artery by femoral/femoral art anastomosis NEC |
| 7A52011   | Endarterectomy and repair                                    |
| G350.00   | Subsequent myocardial infarction of anterior wall            |
| 7922200   | Allograft replacement of three coronary arteries             |
| 8B27.00   | Antianginal therapy                                          |
| G30yz00   | Other acute myocardial infarction NOS                        |
| G380.00   | Postoperative transmural myocardial infarction anterior wall |
| 7A35000   | Percutaneous transluminal angioplasty of coeliac artery NEC  |
| G35X.00   | Subsequent myocardial infarction of unspecified site         |
| G381.00   | Postoperative transmural myocardial infarction inferior wall |
| 7A4B.00   | Transluminal operations on femoral or popliteal artery       |
| 7A42000   | Endarterectomy and patch repair of iliac artery              |
| 7A47.13   | Other emergency bypass of deep femoral artery                |
| 7A13411   | Tube graft abdominal Aortic aneurysm (emergency)             |
| G306.00   | True posterior myocardial infarction                         |
| 7A4Bz00   | Transluminal operation on femoral or popliteal artery NOS    |
| 7A48700   | Bypass popliteal artery by pop/tib a anast c vein graft NEC  |
| 7A12000   | Emerg bypass bifurc aorta by anast aorta to femoral artery   |
| 7922z00   | Allograft replacement of coronary artery NOS                 |
| 14AH.00   | H/O: Myocardial infarction in last year                      |
| G654.00   | Multiple and bilateral precerebral artery syndromes          |
| 7A11311   | Y graft abdominal Aortic aneurysm                            |
| 7A42100   | Endarterectomy of iliac artery NEC                           |
| G6y.00    | Other specified cerebrovascular disease                      |
| 9Om3.00   | Stroke/transient ischaemic attack monitoring verbal invitati |
| 7920z00   | Saphenous vein graft replacement coronary artery NOS         |
| 7A4B.15   | Transluminal procedure on superficial femoral artery         |
| G666.00   | Pure sensory lacunar syndrome                                |
| 7A4B300   | Percutaneous transluminal embolectomy of popliteal artery    |
| 7A47200   | Emerg bypass femoral art by fem/pop a anast c vein graft NEC |
| 7A4B.13   | Transluminal procedure on femoral artery                     |
| 7A4B.14   | Transluminal procedure on popliteal artery                   |
| 388E.00   | Canadian Cardiovascular Society classification of angina     |
| 7A49100   | Endarterectomy and patch repair of popliteal artery          |
| 3236      | ECG: lateral infarction                                      |
| 7924000   | Revision of bypass for one coronary artery                   |
| 7A48A00   | Bypass femoral artery by fem/peron a anast c vein graft NEC  |
| Gyu6400   | [X]Other cerebral infarction                                 |
| 7A13400   | Emerg replace aneurysm abdom aorta by anast aorta/aorta NEC  |
| G311z00   | Preinfarction syndrome NOS                                   |
| G33z100   | Stenocardia                                                  |
| 7A28200   | Percutaneous transluminal angioplasty of vertebral artery    |
| 792C000   | Replacement of coronary arteries using multiple methods      |
| G311011   | MI - myocardial infarction aborted                           |
| G65z000   | Impending cerebral ischaemia                                 |
| 3235      | ECG: subendocardial infarct                                  |
| 792C.00   | Other replacement of coronary artery                         |
| ZR3P.00   | CLASP angina score                                           |
| 7A12y00   | Other specified other bypass of bifurcation of aorta         |
| 8HHM.00   | Ref to multidisciplinary stroke function improvement service |
| 14AJ.00   | H/O: Angina in last year                                     |

| Read code | Description                                                  |
|-----------|--------------------------------------------------------------|
| 7922100   | Allograft replacement of two coronary arteries               |
| 7A48100   | Bypass popliteal artery by pop/pop a anast c prosthesis NEC  |
| 7A12z00   | Other bypass of bifurcation of aorta NOS                     |
| 7A6H300   | Prosthetic graft patch angioplasty                           |
| 7A47y00   | Other emergency bypass of femoral or popliteal artery OS     |
| 7923200   | Prosthetic replacement of three coronary arteries            |
| G33z000   | Status anginosus                                             |
| 7A26A00   | Endarterectomy and patch repair of vertebral artery          |
| 7929200   | Percut translum inject therap subst to coronary artery NEC   |
| 7A34K00   | Operation on aneurysm visceral branch of abdominal aorta NEC |
| 7923100   | Prosthetic replacement of two coronary arteries              |
| 7A47400   | Emerg bypass femoral art by fem/tib art anast c prosth NEC   |
| 14AK.00   | H/O: Stroke in last year                                     |
| 7A47700   | Emerg bypass pop art by pop/tib art anast c vein graft NEC   |
| 7A26400   | Endarterectomy and patch repair of subclavian artery         |
| 7A33K00   | Endarterectomy & patch rep visceral branch abdomin aorta NEC |
| Gyu6G00   | [X]Cerebr infarct due unsp occlus/stenos precerebr arteries  |
| 7A6H400   | Percutaneous transluminal angioplasty of vascular graft      |
| 7924100   | Revision of bypass for two coronary arteries                 |
| 7A33E00   | Endarterectomy of superior mesenteric artery NEC             |
| 7923300   | Prosthetic replacement of four or more coronary arteries     |
| 7A47100   | Emerg bypass popliteal art by pop/pop art anast c prosth NEC |
| 7A48800   | Bypass femoral artery by fem/peron a anast c prosthesis NEC  |
| 7A22200   | Endovascular repair of carotid artery                        |
| 7A47z00   | Other emergency bypass of femoral or popliteal artery NOS    |
| G31y100   | Microinfarction of heart                                     |
| 7A33C00   | Endarterectomy of coeliac artery NEC                         |
| 7A48B00   | Bypass popliteal art by pop/peron art anast c vein graft NEC |
| G38z.00   | Postoperative myocardial infarction, unspecified             |
| 7A26C00   | Endarterectomy of vertebral artery NEC                       |
| 792By00   | Other specified repair of coronary artery                    |
| G365.00   | Rupture papillary muscle/curr comp fol acute myocard infarct |
| SP00300   | Mechanical complication of coronary bypass                   |
| 7922000   | Allograft replacement of one coronary artery                 |
| 7A26900   | Endarterectomy and patch repair of brachial artery           |
| 7A1B000   | Endovascular stenting infrarenal abdominal aortic aneurysm   |
| 7A4B700   | Arteriography of popliteal artery                            |
| 792Cz00   | Replacement of coronary artery NOS                           |
| 7A47D00   | Emerg bypass popliteal artery by pop/fem art anastomosis NEC |
| 7A4B400   | Percutaneous transluminal embolisation of femoral artery     |
| 7A35200   | Percutaneous transluminal angioplasty inf mesenteric art NEC |
| 7A41200   | Emerg bypass iliac artery by femoral/femoral art anast NEC   |
| 7A47.11   | Other emerg bypass femoral or popliteal art by anastomosis   |
| G353.00   | Subsequent myocardial infarction of other sites              |
| 7A21000   | Repair of carotid artery NEC                                 |
| 7928300   | Percut translum cutting balloon angioplasty coronary artery  |
| 7A0B000   | Pulmonary thromboendarterectomy                              |
| Gyu6500   | [X]Occlusion and stenosis of other precerebral arteries      |
| Gyu6300   | [X]Cerebrl infarctn due/unspcf occlusn or sten/cerebrl artrs |
| 7A10000   | Emerg aortic bypass by anastomosis axillary to femoral art   |
| 7A47600   | Emerg bypass femoral art by fem/tib a anast c vein graft NEC |
| SP01200   | Mechanical complication of carotid artery bypass             |
| Gyu3400   | [X]Acute transmural myocardial infarction of unspcif site    |
| 7A20z00   | Reconstruction of carotid artery NOS                         |
| 7A1B800   | Endovascul insert stent infrarenal abdominal aortic aneurysm |
| 7A47.15   | Other emergency bypass of superficial femoral artery         |
| 7924y00   | Other specified revision of bypass for coronary artery       |
| ZRB1.00   | Euroscore for angina                                         |
| 7A47800   | Emerg bypass femoral art by fem/peron art anast c prosth NEC |
| 7A1BC00   | Endovas insert stent for aortic aneurysm of bifurcation NEC  |
| Gyu3600   | [X]Subsequent myocardial infarction of unspecified site      |

| <b>Read code</b> | <b>Description</b>                                    |
|------------------|-------------------------------------------------------|
| 7A47.12          | Other emergency bypass of common femoral artery       |
| 7924300          | Revision of bypass for four or more coronary arteries |

## Visual

| <b>Read code</b> | <b>Description</b>                                                |
|------------------|-------------------------------------------------------------------|
| 1B75.00          | Loss of vision                                                    |
| 1B77.00          | Deteriorating vision                                              |
| 29J3.00          | O/E - visual suppression                                          |
| 2B69.00          | O/E -R-eye counts fingers only                                    |
| 2B6A.00          | O/E-R-eye perceives light only                                    |
| 2B6A.11          | O/E - blind R-eye                                                 |
| 2B6B.00          | O/E - R-eye completely blind                                      |
| 2B6S.00          | O/E - pinhole R-eye completely blind                              |
| 2B79.00          | O/E -L-eye counts fingers only                                    |
| 2B7A.00          | O/E-L-eye perceives light only                                    |
| 2B7A.11          | O/E - blind L-eye                                                 |
| 2B7B.00          | O/E - L-eye completely blind                                      |
| 2B7S.00          | O/E - pinhole L-eye completely blind                              |
| 2BBa.00          | O/E- non-referable retinopathy                                    |
| 2BBk.00          | O/E - right eye stable treated proliferative diabetic retinopathy |
| 2BBL.00          | O/E - diabetic maculopathy present both eyes                      |
| 2BBl.00          | O/E - left eye stable treated proliferative diabetic retinopathy  |
| 2BBM.00          | O/E - diabetic maculopathy absent both eyes                       |
| 2BBm.00          | O/E - right eye clinically significant macular oedema             |
| 2BBn.00          | O/E - left eye clinically significant macular oedema              |
| 2BBO.00          | O/E - Laser photocoagulation scars                                |
| 2BBo.00          | O/E - sight threatening diabetic retinopathy                      |
| 2BBP.00          | O/E - right eye background diabetic retinopathy                   |
| 2BBQ.00          | O/E - left eye background diabetic retinopathy                    |
| 2BBR.00          | O/E - right eye preproliferative diabetic retinopathy             |
| 2BBS.00          | O/E - left eye preproliferative diabetic retinopathy              |
| 2BBT.00          | O/E - right eye proliferative diabetic retinopathy                |
| 2BBV.00          | O/E - left eye proliferative diabetic retinopathy                 |
| 2BBW.00          | O/E - right eye diabetic maculopathy                              |
| 2BBX.00          | O/E - left eye diabetic maculopathy                               |
| 6688.00          | Registered partially sighted                                      |
| 6688.11          | Registered partially blind                                        |
| 6689.00          | Registered blind                                                  |
| 7272012          | Photocoagulation of lesion of retina NEC                          |
| 7276.00          | Pan retinal photocoagulation for diabetes                         |
| 8HBD.00          | Retinopathy follow up                                             |
| 8HBG.00          | Diabetic retinopathy 12 month review                              |
| 8HBH.00          | Diabetic retinopathy 6 month review                               |
| C108700          | Insulin dependent diabetes mellitus with retinopathy              |
| C108711          | Type I diabetes mellitus with retinopathy                         |
| C108712          | Type 1 diabetes mellitus with retinopathy                         |
| C109600          | Non-insulin-dependent diabetes mellitus with retinopathy          |
| C109611          | Type II diabetes mellitus with retinopathy                        |
| C109612          | Type 2 diabetes mellitus with retinopathy                         |
| C10E700          | Type 1 diabetes mellitus with retinopathy                         |
| C10EP00          | Type 1 diabetes mellitus with exudative maculopathy               |
| C10F600          | Type 2 diabetes mellitus with retinopathy                         |
| C10F611          | Type II diabetes mellitus with retinopathy                        |
| C10FQ00          | Type 2 diabetes mellitus with exudative maculopathy               |
| F404100          | Blind hypotensive eye                                             |
| F404200          | Blind hypertensive eye                                            |
| F420.00          | Diabetic retinopathy                                              |
| F420000          | Background diabetic retinopathy                                   |
| F420100          | Proliferative diabetic retinopathy                                |

|         |                                                         |
|---------|---------------------------------------------------------|
| F420200 | Preproliferative diabetic retinopathy                   |
| F420300 | Advanced diabetic maculopathy                           |
| F420400 | Diabetic maculopathy                                    |
| F420600 | Non proliferative diabetic retinopathy                  |
| F420700 | High risk proliferative diabetic retinopathy            |
| F420800 | High risk non proliferative diabetic retinopathy        |
| F420z00 | Diabetic retinopathy NOS                                |
| F421.00 | Other background retinopathy                            |
| F421000 | Unspecified background retinopathy                      |
| F421200 | Renal retinopathy                                       |
| F421z00 | Other background retinopathy NOS                        |
| F422.00 | Other proliferative retinopathy                         |
| F422y00 | Other specified other proliferative retinopathy         |
| F422z00 | Proliferative retinopathy NOS                           |
| F425.00 | Degeneration of macula and posterior pole               |
| F425.11 | Senile macular degeneration                             |
| F425000 | Unspecified senile macular degeneration                 |
| F425100 | Dry senile macular degeneration                         |
| F425200 | Wet senile macular degeneration                         |
| F425300 | Cystoid macular degeneration                            |
| F425400 | Degeneration of macular due to cyst, hole or pseudohole |
| F425411 | Macular cyst or hole                                    |
| F425412 | Macular hole                                            |
| F425500 | Toxic maculopathy                                       |
| F425600 | Macular puckering                                       |
| F425z00 | Degeneration of macula or posterior pole NOS            |
| F427900 | Stargardt's disease                                     |
| F427B00 | Fundus flavimaculatus                                   |
| F427C00 | Vitelliform dystrophy                                   |
| F427z11 | Hereditary macular degeneration                         |
| F42y900 | Macular oedema                                          |
| F430500 | Focal macular retinochoroiditis                         |
| F433200 | Other macular scars                                     |
| F48y012 | Dull vision NOS                                         |
| F49..00 | Blindness and low vision                                |
| F49..12 | Low vision                                              |
| F49..13 | Partial sight                                           |
| F490.00 | Blindness, both eyes                                    |
| F490000 | Unspecified blindness both eyes                         |
| F490900 | Acquired blindness, both eyes                           |
| F490z00 | Blindness both eyes NOS                                 |
| F491.00 | Better eye: low vision, Lesser eye: profound VI         |
| F491000 | One eye blind, one eye low vision                       |
| F491100 | Better eye: severe VI, Lesser eye: blind, unspecified   |
| F491500 | Better eye: moderate VI, Lesser eye: blind, unspecified |
| F491z00 | One eye blind, one eye low vision NOS                   |
| F492.00 | Low vision, both eyes                                   |
| F492000 | Low vision, both eyes unspecified                       |
| F492200 | Better eye: severe VI, Lesser eye: severe VI            |
| F492z00 | Low vision, both eyes NOS                               |
| F493.00 | Visual loss, both eyes unqualified                      |
| F495.00 | Profound impairment, one eye                            |
| F495000 | Blindness, one eye, unspecified                         |
| F495A00 | Acquired blindness, one eye                             |
| F496.00 | Low vision, one eye                                     |
| F496000 | Low vision, one eye, unspecified                        |
| F496z00 | Low vision, one eye NOS                                 |
| F49y.00 | Visual loss, one eye, unqualified                       |
| F49z.00 | Visual loss NOS                                         |
| F49z.11 | Acquired blindness                                      |
| F4A2400 | Macular keratitis NOS                                   |
| F4B5500 | Macular corneal dystrophy                               |

|         |                                                                       |
|---------|-----------------------------------------------------------------------|
| FyuF700 | <input checked="" type="checkbox"/> Other proliferative retinopathy   |
| FyuL.00 | <input checked="" type="checkbox"/> Visual disturbances and blindness |
| ZV41000 | <input type="checkbox"/> Problems with sight                          |



## Renal codes

| <b>Read code</b> | <b>description</b>                                           |
|------------------|--------------------------------------------------------------|
| 14D1.00          | H/O: nephritis                                               |
| 14V2.00          | H/O: renal dialysis                                          |
| 14V2.11          | H/O: kidney dialysis                                         |
| 1Z10.00          | Chronic kidney disease stage 1                               |
| 1Z11.00          | Chronic kidney disease stage 2                               |
| 1Z12.00          | Chronic kidney disease stage 3                               |
| 1Z13.00          | Chronic kidney disease stage 4                               |
| 1Z14.00          | Chronic kidney disease stage 5                               |
| 1Z15.00          | Chronic kidney disease stage 3A                              |
| 1Z16.00          | Chronic kidney disease stage 3B                              |
| 1Z1B.00          | Chronic kidney disease stage 3 with proteinuria              |
| 1Z1B.11          | CKD stage 3 with proteinuria                                 |
| 1Z1C.00          | Chronic kidney disease stage 3 without proteinuria           |
| 1Z1C.11          | CKD stage 3 without proteinuria                              |
| 1Z1D.00          | Chronic kidney disease stage 3A with proteinuria             |
| 1Z1D.11          | CKD stage 3A with proteinuria                                |
| 1Z1E.00          | Chronic kidney disease stage 3A without proteinuria          |
| 1Z1E.11          | CKD stage 3A without proteinuria                             |
| 1Z1F.00          | Chronic kidney disease stage 3B with proteinuria             |
| 1Z1F.11          | CKD stage 3B with proteinuria                                |
| 1Z1G.00          | Chronic kidney disease stage 3B without proteinuria          |
| 1Z1G.11          | CKD stage 3B without proteinuria                             |
| 1Z1H.00          | Chronic kidney disease stage 4 with proteinuria              |
| 1Z1H.11          | CKD stage 4 with proteinuria                                 |
| 1Z1J.00          | Chronic kidney disease stage 4 without proteinuria           |
| 1Z1J.11          | CKD stage 4 without proteinuria                              |
| 1Z1K.00          | Chronic kidney disease stage 5 with proteinuria              |
| 1Z1K.11          | CKD stage 5 with proteinuria                                 |
| 1Z1L.00          | Chronic kidney disease stage 5 without proteinuria           |
| 1Z1L.11          | CKD stage 5 without proteinuria                              |
| 4I29.00          | Peritoneal dialysis sample                                   |
| 4N2..00          | Dialysis fluid glucose level                                 |
| 7A60600          | Creation of graft fistula for dialysis                       |
| 7A61900          | Ligation of arteriovenous dialysis fistula                   |
| 7B00.00          | Transplantation of kidney                                    |
| 7B00000          | Autotransplant of kidney                                     |
| 7B00100          | Transplantation of kidney from live donor                    |
| 7B00111          | Allotransplantation of kidney from live donor                |
| 7B00200          | Transplantation of kidney from cadaver                       |
| 7B00211          | Allotransplantation of kidney from cadaver                   |
| 7B00300          | Allotransplantation of kidney from cadaver, heart-beating    |
| 7B00400          | Allotransplantation kidney from cadaver, heart non-beating   |
| 7B00y00          | Other specified transplantation of kidney                    |
| 7B00z00          | Transplantation of kidney NOS                                |
| 7B01500          | Transplant nephrectomy                                       |
| 7B01511          | Excision of rejected transplanted kidney                     |
| 7B06300          | Exploration of renal transplant                              |
| 7B0F.00          | Interventions associated with transplantation of kidney      |
| 7B0F100          | Pre-transplantation of kidney work-up, recipient             |
| 7B0F200          | Pre-transplantation of kidney work-up, live donor            |
| 7B0F400          | Post-transplantation of kidney examination, live donor       |
| 7L02000          | Autotransplantation adrenal medulla to caudate nucleus brain |
| 7L1A.00          | Compensation for renal failure                               |
| 7L1A.11          | Dialysis for renal failure                                   |
| 7L1A000          | Renal dialysis                                               |
| 7L1A100          | Peritoneal dialysis                                          |
| 7L1A200          | Haemodialysis NEC                                            |
| 7L1A400          | Automated peritoneal dialysis                                |
| 7L1A500          | Continuous ambulatory peritoneal dialysis                    |

7L1A600 Peritoneal dialysis NEC  
 7L1Ay00 Other specified compensation for renal failure  
 7L1Az00 Compensation for renal failure NOS  
 7L1B.00 Placement ambulatory apparatus compensation renal failure  
 7L1B.11 Placement ambulatory dialysis apparatus - compens renal fail  
 7L1B000 Insertion of ambulatory peritoneal dialysis catheter  
 7L1B100 Removal of ambulatory peritoneal dialysis catheter  
 7L1By00 Placement ambulatory apparatus- compensate renal failure OS  
 7L1C.00 Placement other apparatus for compensation for renal failure  
 7L1C000 Insertion of temporary peritoneal dialysis catheter  
 7L1Cz00 Placement other apparatus- compensate for renal failure NOS  
 8882 Intestinal dialysis  
 8L50.00 Renal transplant planned  
 D215.00 Anaemia secondary to renal failure  
 D215000 Anaemia secondary to chronic renal failure  
 F374A00 Polyneuropathy in uraemia  
 G232.00 Hypertensive heart&renal dis wth (congestive) heart failure  
 G234.00 Hyperten heart&renal dis+both(congestv)heart and renal fail  
 G500400 Acute pericarditis - uraemic  
 K0...00 Nephritis, nephrosis and nephrotic syndrome  
 K001.00 Acute nephritis with lesions of necrotising glomerulitis  
 Nephrotic syndrome+membranoproliferative  
 glomerulonephritis  
 K012.00 Nephrotic syndrome, diffuse membranous glomerulonephritis  
 K016.00 Nephrotic syn difus mesangial proliferativ glomerulonephritis  
 K017.00 Nephrotic syn,difus endocapillary prolif tv glomerulonephritis  
 K018.00 Nephrotic syn,difus mesangiocapillary glomerulonephritis  
 K019.00 Nephrotic syndrome, diffuse crescentic glomerulonephritis  
 K02..00 Chronic glomerulonephritis  
 K02..11 Nephritis - chronic  
 K02..12 Nephropathy - chronic  
 K020.00 Chronic proliferative glomerulonephritis  
 K021.00 Chronic membranous glomerulonephritis  
 K022.00 Chronic membranoproliferative glomerulonephritis  
 K023.00 Chronic rapidly progressive glomerulonephritis  
 K02y.00 Other chronic glomerulonephritis  
 K02y000 Chronic glomerulonephritis + diseases EC  
 K02y200 Chronic focal glomerulonephritis  
 K02y300 Chronic diffuse glomerulonephritis  
 K02yz00 Other chronic glomerulonephritis NOS  
 K02z.00 Chronic glomerulonephritis NOS  
 K03..00 Nephritis and nephropathy unspecified  
 K03..11 Nephritis and nephropathy unspecified  
 K03..12 Nephropathy, unspecified  
 K030.00 Proliferative nephritis unspecified  
 K031.00 Membranous nephritis unspecified  
 K032.00 Membranoproliferative nephritis unspecified  
 K032000 Focal membranoproliferative glomerulonephritis  
 K032100 Recurrent benign haematuria syndrome  
 K032300 Anaphylactoid glomerulonephritis  
 K032400 Familial glomerulonephritis in Alport's syndrome  
 K032500 Other familial glomerulonephritis  
 K032600 Berger's IgA or IgG nephropathy  
 K032y00 Nephritis unsp+OS membranoprolif glomerulonephritis lesion  
 K032y11 Hypocomplementaemic persistent glomerulonephritis NEC  
 K032y13 Mesangioproliferative glomerulonephritis NEC  
 K032y14 Mesangiocapillary glomerulonephritis NEC  
 K032y15 Mixed membranous and proliferative glomerulonephritis NEC  
 Nephritis unsp+membranoprolif glomerulonephritis lesion  
 K032z00 NOS  
 K033.00 Rapidly progressive nephritis unspecified  
 K034.00 Renal cortical necrosis unspecified

K035.00 Renal medullary necrosis unspecified  
 K03U.00 Unspecif nephr synd, diff concentric glomerulonephritis  
 K03V.00 Unspecified nephritic syndrome, dense deposit disease  
 K03W.00 Unsp nephrit synd, diff endocap prolif glomerulonephritis  
 K03X.00 Unsp nephrit synd, diff mesang prolif glomerulonephritis  
 K03y.00 Other nephritis and nephrosis unspecified  
 K03y000 Other nephritis and nephrosis in diseases EC  
 K03y200 Other interstitial nephritis  
 K03yz00 Other nephritis and nephrosis NOS  
 K03z.00 Unspecified glomerulonephritis NOS  
 K041.00 Acute renal cortical necrosis  
 K042.00 Acute renal medullary necrosis  
 K04y.00 Other acute renal failure  
 K04z.00 Acute renal failure NOS  
 K05..00 Chronic renal failure  
 K05..11 Chronic uraemia  
 K05..12 End stage renal failure  
 K050.00 End stage renal failure  
 K06..00 Renal failure unspecified  
 K06..11 Uraemia NOS  
 K060.11 Impaired renal function  
 K08..00 Impaired renal function disorder  
 K080.00 Renal osteodystrophy  
 K080000 Phosphate-losing tubular disorders  
 K080100 Renal dwarfism  
 K080200 Renal infantilism  
 K080300 Renal rickets  
 K080z00 Renal osteodystrophy NOS  
 K081.00 Nephrogenic diabetes insipidus  
 K08y.00 Other impaired renal function disorder  
 K08y000 Hypokalaemic nephropathy  
 K08y100 Secondary hyperparathyroidism  
 K08y300 Renal function impairment with growth failure  
 K08y400 Renal tubular acidosis  
 K08y500 Acute interstitial nephritis  
 K08yz00 Other impaired renal function disorder NOS  
 K08yz11 Renal acidaemia  
 K08z.00 Impaired renal function disorder NOS  
 K0A..00 Glomerular disease  
 K0A0200 Acute nephritic syn, diffuse membranous glomerulonephritis  
 K0A0500 Acute neph syn, diffuse mesangiocapillary glomerulonephritis  
 K0A0700 Acute nephrotic syndrm diffuse crescentic glomerulonephritis  
 K0A1.00 Rapidly progressive nephritic syndrome  
 K0A1100 Rapid progres nephritic syn focal+segmental glomerulr lesion  
 Rapid progres neph syn diffuse membranous  
 K0A1200 glomerulonephritis  
 K0A1300 Rpd prog neph syn df mesangial prolifratv glomerulonephritis  
 K0A1600 Rapid progressive nephritic syndrome, dense deposit disease  
 K0A1700 Rapid progres nephritic syn df crescentic glomerulonephritis  
 Recur+persist haematuria difus membranous  
 K0A2200 glomerulonephritis  
 K0A2300 Recur+persist haemuria df mesangial prolif glomerulnephritis  
 K0A2500 Recur+persist hmuria df mesangiocapillary glomerulonephritis  
 K0A2700 Recur+persist haematuria difus crescentic glomerulonephritis  
 K0A3.00 Chronic nephritic syndrome  
 K0A3000 Chronic nephritic syndrome, minor glomerular abnormality  
 K0A3100 Chronic nephritic syndrm focal+segmental glomerular lesions  
 Chron nephritic syndrom difuse membranous  
 K0A3200 glomerulonephritis  
 K0A3300 Chron neph syn difus mesangial prolifrtiv glomerulonephritis  
 K0A3500 Chronic neph syn difus mesangiocapillary glomerulonephritis  
 K0A3600 Chronic nephritic syndrome, dense deposit disease  
 K0A3700 Chronic nephritic syn diffuse crescentic glomerulonephritis

KOA4200 Isolatd proteinur/specfd morphlgcl les df membrn glomneph  
 KOA4300 Isoltd prteinur/spcfd morph lesn df mesngl prolf glomneph  
 KOA4500 Isoltd prteinur+specfd morph les df mesangiocap glomneph  
 KOA5.00 Hereditary nephropathy not elsewhere classified  
 KOA5000 Hereditary nephropathy NEC, minor glomerular abnormality  
 KOA5100 Hereditary nephropathy NEC,focal+segmnt glomerular lesion  
 KOA5200 Hereditry nephropathy NEC,difus membran glomerulnephritis  
 KOA5300 Heredtry nephprthy NEC difus mesangial prolf glomnephrit  
 KOA5600 Hereditary nephropathy, NEC, dense deposit disease  
 KOA5X00 Hereditary nephropathy, unspecif morphological changes  
 KOB5.00 Renal tubulo-interstitial disorders in transplant rejectn  
 KOC4.00 Toxic nephropathy, not elsewhere classified  
 KOD..00 End-stage renal disease  
 KOE..00 Acute-on-chronic renal failure  
 K100000 Chronic pyelonephritis without medullary necrosis  
 K100100 Chronic pyelonephritis with medullary necrosis  
 K101000 Acute pyelonephritis without medullary necrosis  
 Kyu0900 [X]Unsp nephrit synd, diff mesang prolf glomerulonephritis  
 Kyu1C00 [X]Renal tubulo-interstitial disorders/transplant rejection  
 Kyu2.00 [X]Renal failure  
 Kyu2000 [X]Other acute renal failure  
 Kyu2100 [X]Other chronic renal failure  
 R08z000 [D]Extrarenal uraemia  
 SP01500 Mechanical complication of dialysis catheter  
 SP05613 [X] Peritoneal dialysis associated peritonitis  
 SP06B00 Continuous ambulatory peritoneal dialysis associated perit  
 SP07G00 Stenosis of arteriovenous dialysis fistula  
 SP08300 Kidney transplant failure and rejection  
 SP15400 Renal failure as a complication of care  
 SP15411 Kidney failure as a complication of care  
 TA02000 Accid cut,puncture,perf,h'ge - kidney dialysis  
 TA22000 Failure of sterile precautions during kidney dialysis  
 TB00100 Kidney transplant with complication, without blame  
 TB00111 Renal transplant with complication, without blame  
 TB11.00 Kidney dialysis with complication, without blame  
 TB11.11 Renal dialysis with complication, without blame  
 U612200 [X]Failure sterile precautions dur kidney dialys/other perf  
 ZV42000 [V]Kidney transplanted  
 ZV45100 [V]Renal dialysis status  
 ZV56.00 [V]Aftercare involving intermittent dialysis  
 ZV56000 [V]Aftercare involving extracorporeal dialysis  
 ZV56011 [V]Aftercare involving renal dialysis NOS  
 ZV56100 [V]Preparatory care for dialysis  
 ZV56y00 [V]Other specified aftercare involving intermittent dialysis  
 ZV56y11 [V]Aftercare involving peritoneal dialysis  
 ZV56z00 [V]Unspecified aftercare involving intermittent dialysis  
 ZVu3G00 [X]Other dialysis

## **Neuropathy**

| <b>Read code</b> | <b>Description</b>                                           |
|------------------|--------------------------------------------------------------|
| C106.00          | Diabetes mellitus with neurological manifestation            |
| C106.11          | Diabetic amyotrophy                                          |
| C106.12          | Diabetes mellitus with neuropathy                            |
| C106.13          | Diabetes mellitus with polyneuropathy                        |
| C106000          | Diabetes mellitus, juvenile, + neurological manifestation    |
| C106100          | Diabetes mellitus, adult onset, + neurological manifestation |
| C106y00          | Other specified diabetes mellitus with neurological comps    |
| C106z00          | Diabetes mellitus NOS with neurological manifestation        |
| C108200          | Insulin-dependent diabetes mellitus with neurological comps  |
| C108211          | Type I diabetes mellitus with neurological complications     |
| C108212          | Type 1 diabetes mellitus with neurological complications     |

|         |                                                             |
|---------|-------------------------------------------------------------|
| C108B00 | Insulin dependent diabetes mellitus with mononeuropathy     |
| C108B11 | Type I diabetes mellitus with mononeuropathy                |
| C108C00 | Insulin dependent diabetes mellitus with polyneuropathy     |
| C108J00 | Insulin dependent diab mell with neuropathic arthropathy    |
| C108J11 | Type I diabetes mellitus with neuropathic arthropathy       |
| C108J12 | Type 1 diabetes mellitus with neuropathic arthropathy       |
| C109200 | Non-insulin-dependent diabetes mellitus with neuro comps    |
| C109211 | Type II diabetes mellitus with neurological complications   |
| C109212 | Type 2 diabetes mellitus with neurological complications    |
| C109A00 | Non-insulin dependent diabetes mellitus with mononeuropathy |
| C109A11 | Type II diabetes mellitus with mononeuropathy               |
| C109B00 | Non-insulin dependent diabetes mellitus with polyneuropathy |
| C109B11 | Type II diabetes mellitus with polyneuropathy               |
| C109H00 | Non-insulin dependent d m with neuropathic arthropathy      |
| C109H11 | Type II diabetes mellitus with neuropathic arthropathy      |
| C109H12 | Type 2 diabetes mellitus with neuropathic arthropathy       |
| C10E200 | Type 1 diabetes mellitus with neurological complications    |
| C10EB00 | Type 1 diabetes mellitus with mononeuropathy                |
| C10EC00 | Type 1 diabetes mellitus with polyneuropathy                |
| C10EC11 | Type I diabetes mellitus with polyneuropathy                |
| C10EC12 | Insulin dependent diabetes mellitus with polyneuropathy     |
| C10EJ00 | Type 1 diabetes mellitus with neuropathic arthropathy       |
| C10EQ00 | Type 1 diabetes mellitus with gastroparesis                 |
| C10F200 | Type 2 diabetes mellitus with neurological complications    |
| C10F211 | Type II diabetes mellitus with neurological complications   |
| C10FA00 | Type 2 diabetes mellitus with mononeuropathy                |
| C10FA11 | Type II diabetes mellitus with mononeuropathy               |
| C10FB00 | Type 2 diabetes mellitus with polyneuropathy                |
| C10FB11 | Type II diabetes mellitus with polyneuropathy               |
| C10FH00 | Type 2 diabetes mellitus with neuropathic arthropathy       |
| C10FR00 | Type 2 diabetes mellitus with gastroparesis                 |
| F171.00 | Peripheral autonomic neuropathy disease EC                  |
| F171100 | Autonomic neuropathy due to diabetes                        |
| F171z00 | Peripheral autonomic neuropathy due to disease NOS          |
| F246113 | Neuropathic bladder                                         |
| F34..00 | Mononeuritis of upper limb and mononeuritis multiplex       |
| F342400 | Ulnar neuropathy                                            |
| F345.00 | Mononeuritis multiplex                                      |
| F345000 | Diabetic mononeuritis multiplex                             |
| F35z000 | Diabetic mononeuritis NOS                                   |
| F366.00 | Polyneuropathy                                              |
| F367.00 | Peripheral neuropathy                                       |
| F372.00 | Polyneuropathy in diabetes                                  |
| F372.11 | Diabetic polyneuropathy                                     |
| F372.12 | Diabetic neuropathy                                         |
| F372000 | Acute painful diabetic neuropathy                           |
| F372100 | Chronic painful diabetic neuropathy                         |
| F372200 | Asymptomatic diabetic neuropathy                            |
| F374.00 | Polyneuropathy in disease EC                                |
| F374z00 | Polyneuropathy in disease NOS                               |
| F378.00 | Intercostal neuropathy                                      |
| F37y100 | Axonal sensorimotor neuropathy                              |
| F37z.11 | Polyneuropathy unspecified                                  |
| F381300 | Myasthenic syndrome due to diabetic amyotrophy              |
| F381311 | Diabetic amyotrophy                                         |
| F3y0.00 | Diabetic mononeuropathy                                     |
| F3z..00 | Peripheral nervous system disorder NOS                      |
| Fyu6A00 | [X]Other mononeuropathies of upper limb                     |
| Fyu6B00 | [X]Other mononeuropathies of lower limb                     |
| Fyu6C00 | [X]Other specified mononeuropathies                         |
| Fyu7.00 | [X]Polyneuropathies & other disord of peripheral nerv syst  |
| Fyu7200 | [X]Other specified polyneuropathies                         |

|         |                                                         |
|---------|---------------------------------------------------------|
| Fyu7C00 | [X] Polyneuropathy, unspecified                         |
| FyuAC00 | [X]Autonomic neuropathy/endocrine+metabolic diseases CE |
| K16V000 | Neuropathic bladder                                     |
| K16W.00 | Reflex neuropathic bladder, not elsewhere classified    |
| K16X.00 | Uninhibited neuropathic bladder, NEC                    |
| M271100 | Neuropathic diabetic ulcer - foot                       |
| M271700 | Neuropathic foot ulcer                                  |
| N035.00 | Neuropathic arthropathy                                 |
| N035.12 | Neuropathic arthritis                                   |
| N11y200 | Neuropathic spondylopathy                               |
| N242300 | Neuropathic pain                                        |
| SD72200 | Neuropathic foot blister                                |
| ZL1A700 | Under care of neuropathologist                          |
| ZL59300 | Referral to neuropathologist                            |
| ZL99600 | Seen by neuropathologist                                |
| ZLD2S00 | Discharge by neuropathologist                           |
